# Supplementary material for: Effect of the Silica–Magnetite Nanocomposite Coating Functionalization on the Doxorubicin Sorption/Desorption
Source: MDPI journal article supplement (doi:10.3390/pharmaceutics14112271), 2022-10-24
Supplement: s1 [file s1]

## Supplementary Materials

### Effect of the Silica–Magnetite Nanocomposite Coating Functionalization on the Doxorubicin Sorption / Desorption

**Alexander M. Demin** <sup>1,\*</sup>, **Alexander V. Vakhrushev** <sup>1</sup>, **Marina S. Valova** <sup>1</sup>,  
**Marina A. Korolyova** <sup>1</sup>, **Mikhail A. Uimin** <sup>2</sup>, **Artem S. Minin** <sup>2</sup>, **Varvara A. Pozdina** <sup>3,4</sup>,  
**Iliya V. Byzov** <sup>2</sup>, **Andrey A. Tumashov** <sup>1</sup>, **Konstantin A. Chistyakov** <sup>1</sup>, **Galina L. Levit** <sup>1</sup>,  
**Victor P. Krasnov** <sup>1,\*</sup> and **Valery N. Charushin** <sup>1,5</sup>

<sup>1</sup> Postovsky Institute of Organic Synthesis, Russian Academy of Sciences (Ural Branch), Ekaterinburg 620108, Russia

<sup>2</sup> Mikheev Institute of Metal Physics, Russian Academy of Sciences (Ural Branch), Ekaterinburg 620990, Russia

<sup>3</sup> Institute of Immunology and Physiology, Russian Academy of Sciences (Ural Branch), Ekaterinburg 620049, Russia

<sup>4</sup> Institute of Natural Sciences and Mathematics, Ural Federal University, Ekaterinburg, 620002, Russia

<sup>5</sup> Institute of Chemical Engineering, Ural Federal University, Ekaterinburg 620002, Russia

## Estimation of Inorganic Component Ratio ( $\text{SiO}_2 : \text{Fe}_3\text{O}_4$ ) Based on the UATR-FTIR Data

The estimations of inorganic component ratio ( $\text{SiO}_2 : \text{Fe}_3\text{O}_4$ ) were performed based on the UATR-FTIR data. For this, we used Omnic 7.3 software. Figure S1 shows a scheme for calculating the areas of absorption bands related to vibrations of Si–O and Fe–O bonds in the UATR-FTIR spectra of NC **6** as an example. The original reflectance spectrum (Figures 2 and S1a) was transformed into an absorbance spectrum (Figure S1b). Next, to calculate the area ratio of the absorption bands, we chose the bands of vibrations of Si–O bonds in the range of 1300–755  $\text{cm}^{-1}$  (Figure S1c) and the bands of vibrations of Fe–O bonds in the range of 750–500  $\text{cm}^{-1}$  (Figure S1d).

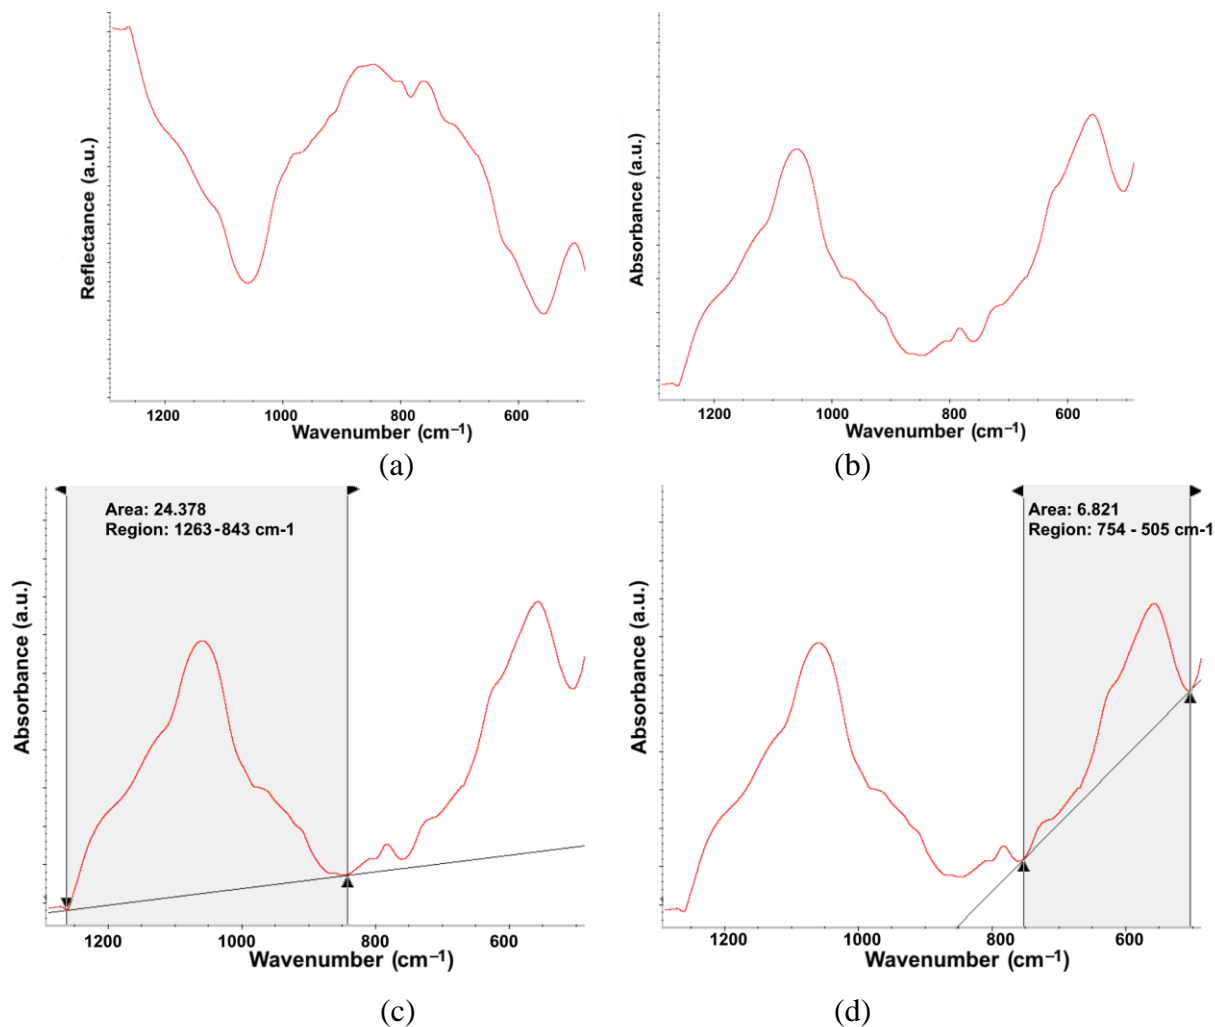

**Figure S1.** Calculation of areas of absorption bands related to vibrations of Si–O and Fe–O bonds in UATR-FTIR spectra of NC **6**: (a) reflectance and (b) absorbance spectra; calculation of areas of absorption bands related to vibrations of (c) Si–O and (d) Fe–O bonds.

## Magnetization Reversal Curves

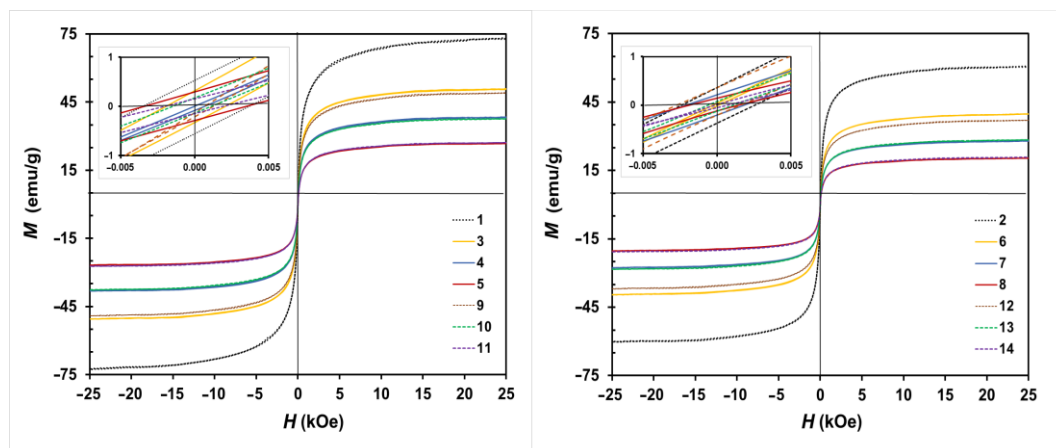

**Figure S2.** Magnetization reversal curves for NCs **1, 3–5, 9–11** (left) and **2, 6–8, 12–14** (right).

## TEM Analysis

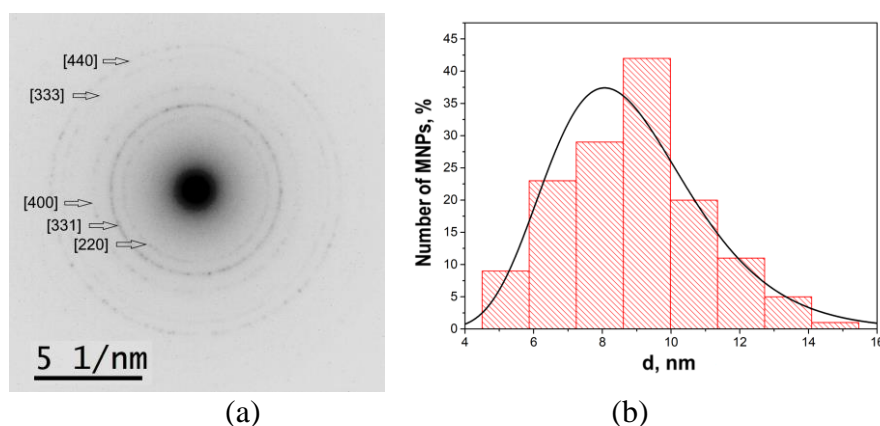

**Figure S3.** (a) Electron diffraction pattern of NC **18** (corresponds to JCPDS Card No. (79 - 0417) Magnetite – synthetic). (b) The size distribution of Fe<sub>3</sub>O<sub>4</sub> MNPs (core) in composition of NC **18** from TEM data.

Core size histogram was constructed using the Sturges' method (Figure S3b). To do this, we used the data for 143 nanoparticles ( $N = 143$ ). The bin-width ( $W$ ) is obtained from the formulas (S1) and (S2):

$$W = (D_{\max} - D_{\min})/k, \quad (\text{S1})$$

$$k = 1 + 3.322 \times \log(N), \quad (\text{S2})$$

where  $D_{\max} = 15.45$  nm,  $D_{\min} = 4.45$  nm,  $k$  is the number of bins in histogram,  $N$  is the number of nanoparticles used in calculations.

A core size histogram obtained in Origin 2022 software can be considered as a log-normal distribution. A mean particle size ( $D_{\text{mean}}$ ) and the dispersity ( $\sigma$ ) were 8.8 and 0.24 nm, respectively.

## UV-Vis and Fluorescence Spectrometry

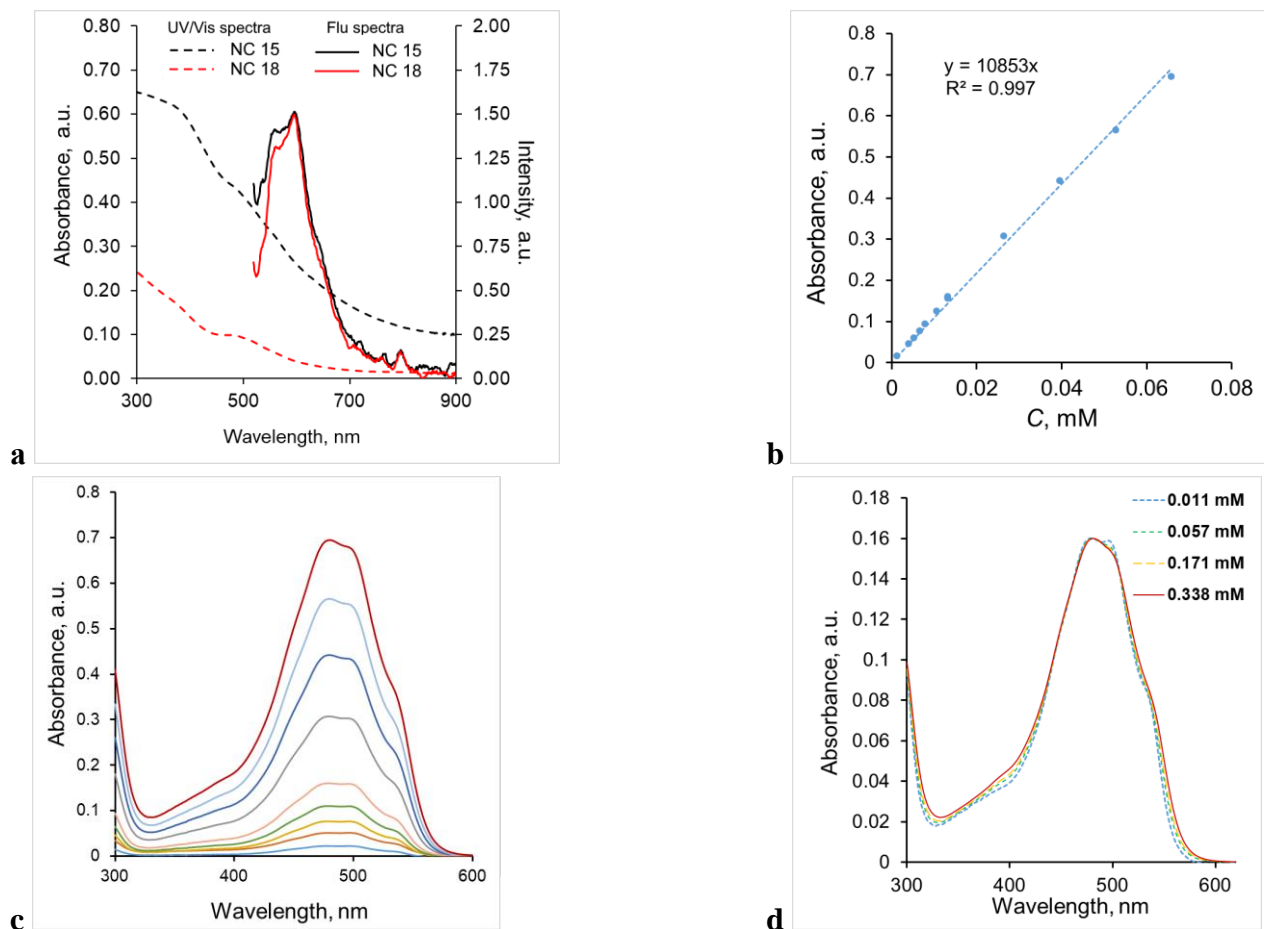

**Figure S4.** (a) Absorption and fluorescence spectra of colloidal solutions of NCs 15 and 18. (b) Determination of the molecular extinction coefficient of Dox at 480 nm, concentration from  $2 \times 10^{-6}$  to  $7 \times 10^{-5}$  M. (c) Fragment of the absorption spectra of analyzed Dox solutions in the range of 300–600 nm. (d) Normalized absorption spectra of Dox at various concentrations.

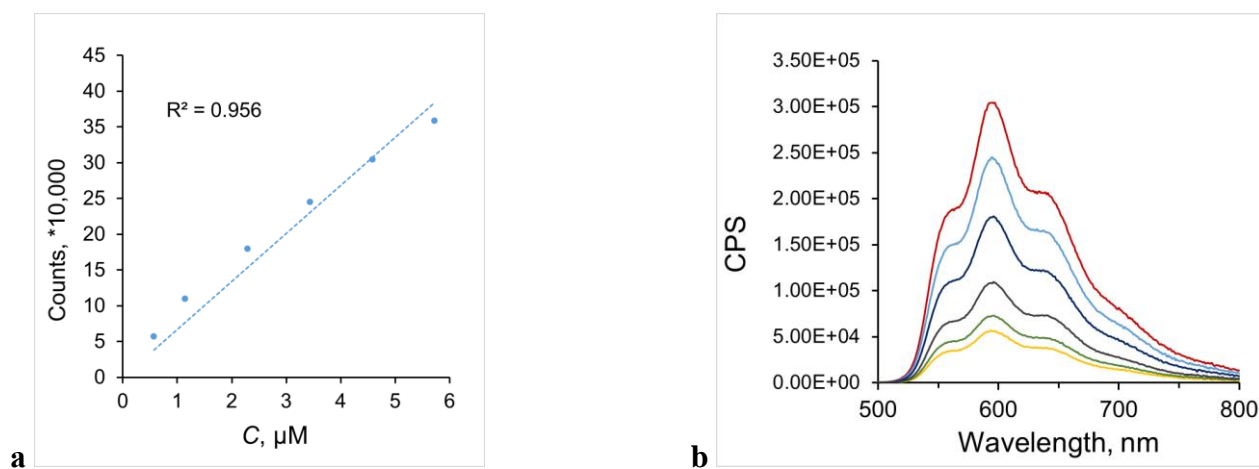

**Figure S5.** (a) Calibration plot of fluorescence intensity at 594 nm vs. Dox concentration. (b) Fragment of the emission spectra of analyzed Dox solutions in the range of 500–800 nm.

## Dox Sorption onto MNPs 1 and 2

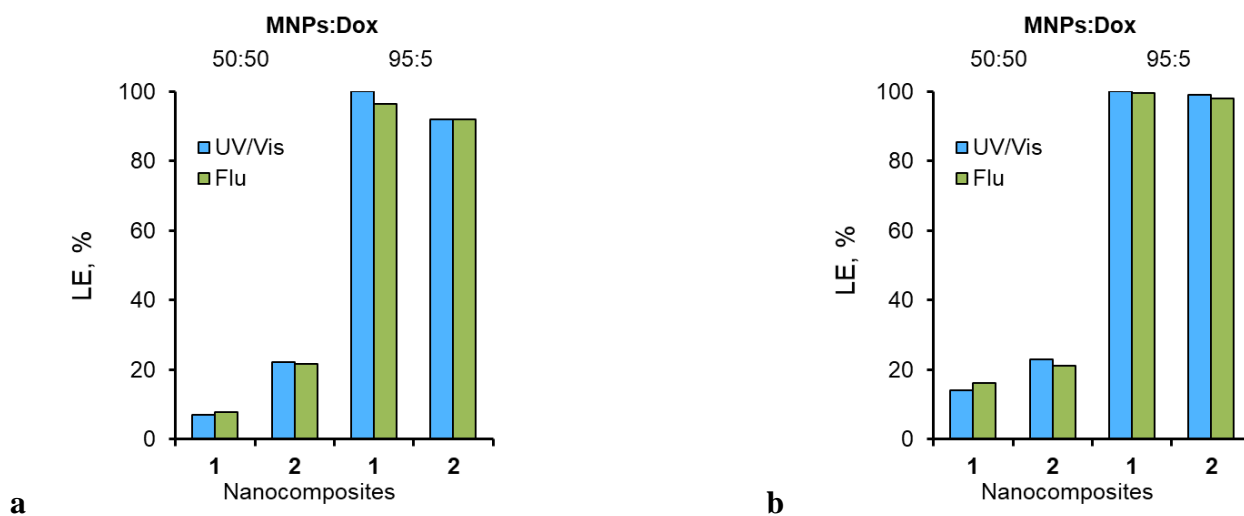

**Figure S6.** The efficiency of Dox sorption onto MNPs **1** and **2** for (a) 1 min and (b) 24 h; MNPs–Dox ratio 50:50 or 95:5. Dox loading efficiency (LE, %) was calculated from the UV-Vis and fluorescence spectrometry data.

Sorption proceeds rather quickly; the LE values of the samples isolated 1 min and 24 h after the beginning of sorption differed insignificantly. At a MNPs–Dox ratio of 95:5, LE for both types of particles reached 100%. The calculated LE values for MNPs **1** and **2** were 7 and 23%, respectively.

# Cartesian Coordinates of Dox, SiO<sub>2</sub> Cluster, Conjugates of SiO<sub>2</sub> Cluster with APS and PMIDA, and Their Dox Complexes with the Lowest Energy at the B3LYP-D3-gCP/def2-SVP Level of Theory.

$E$  is total electronic energy in Hartree's

## Dox

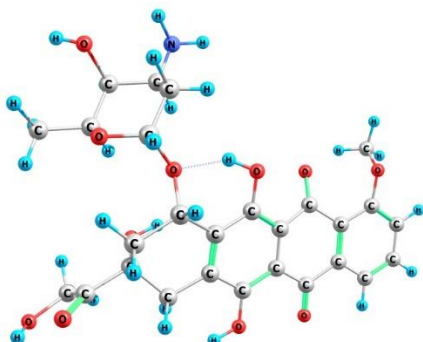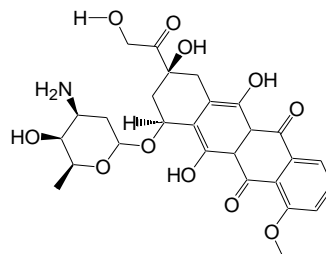

$E = -1925.926799567$

|   |              |              |              |
|---|--------------|--------------|--------------|
| O | 2.083051000  | 0.650286000  | -0.763313000 |
| O | 4.336244000  | 1.197017000  | -1.209375000 |
| O | 2.924900000  | -1.431342000 | 1.573533000  |
| O | 5.171303000  | 4.051447000  | -0.785732000 |
| O | -0.518366000 | 0.947481000  | -1.027788000 |
| O | -1.039242000 | -4.124797000 | 1.096376000  |
| O | 4.587831000  | -3.932369000 | -0.220220000 |
| O | 5.718316000  | -4.394287000 | 2.157725000  |
| O | -2.793151000 | 1.504020000  | 0.226843000  |
| O | -3.613706000 | -3.660533000 | 1.310114000  |
| O | -5.437649000 | 1.840335000  | -0.383846000 |
| N | 2.565119000  | 4.966279000  | -0.243705000 |
| C | 1.781299000  | -0.726311000 | -1.116439000 |
| C | 2.894259000  | -2.367294000 | 0.497604000  |
| C | 2.961217000  | -1.687682000 | -0.881115000 |
| C | 1.601743000  | -3.227795000 | 0.524384000  |
| C | 0.488549000  | -1.136036000 | -0.402751000 |
| C | 0.373641000  | -2.381581000 | 0.227612000  |
| C | 3.001967000  | 1.363266000  | -1.622571000 |
| C | 2.605297000  | 2.845658000  | -1.641105000 |
| C | 2.879444000  | 3.533956000  | -0.282205000 |
| C | 4.351671000  | 3.296010000  | 0.111376000  |
| C | 4.679083000  | 1.782337000  | 0.073358000  |
| C | -0.641841000 | -0.270402000 | -0.462311000 |
| C | 4.108295000  | -3.296241000 | 0.702093000  |
| C | -0.909069000 | -2.863337000 | 0.622240000  |
| C | -1.888630000 | -0.690067000 | 0.044941000  |
| C | -2.049042000 | -2.030172000 | 0.518279000  |
| C | 6.153524000  | 1.474937000  | 0.308627000  |
| C | 4.696165000  | -3.427443000 | 2.102928000  |
| C | -3.008881000 | 0.299411000  | 0.173079000  |
| C | -3.408933000 | -2.527781000 | 0.884174000  |
| C | -4.394903000 | -0.247297000 | 0.303208000  |
| C | -4.576597000 | -1.601021000 | 0.673326000  |

|   |              |              |              |
|---|--------------|--------------|--------------|
| C | -5.541704000 | 0.564788000  | 0.095751000  |
| C | -5.867370000 | -2.117480000 | 0.872457000  |
| C | -6.825045000 | 0.029621000  | 0.298054000  |
| C | -6.987588000 | -1.302448000 | 0.691031000  |
| C | -5.539209000 | 2.909740000  | 0.566299000  |
| H | 1.548473000  | -0.743067000 | -2.203797000 |
| H | 2.936120000  | -2.475032000 | -1.654050000 |
| H | 3.907430000  | -1.138566000 | -1.007849000 |
| H | 1.500344000  | -3.690977000 | 1.525644000  |
| H | 1.706672000  | -4.055572000 | -0.204967000 |
| H | 2.944185000  | 0.927158000  | -2.639512000 |
| H | 1.544647000  | 2.957072000  | -1.937981000 |
| H | 3.207151000  | 3.337244000  | -2.427944000 |
| H | 2.261360000  | 3.035268000  | 0.490286000  |
| H | 4.501282000  | 3.649079000  | 1.153877000  |
| H | 4.071409000  | 1.287221000  | 0.858426000  |
| H | 2.101203000  | -0.913466000 | 1.587339000  |
| H | 6.332946000  | 0.385252000  | 0.279750000  |
| H | 6.779723000  | 1.949030000  | -0.468420000 |
| H | 6.474902000  | 1.852723000  | 1.296850000  |
| H | 1.601949000  | 5.114297000  | -0.564146000 |
| H | 3.157492000  | 5.450495000  | -0.926813000 |
| H | 3.869499000  | -3.670030000 | 2.807013000  |
| H | 5.061938000  | -2.421983000 | 2.408617000  |
| H | 6.019287000  | 4.236547000  | -0.350830000 |
| H | 0.440428000  | 1.178343000  | -1.011562000 |
| H | -0.187771000 | -4.593988000 | 1.057776000  |
| H | -5.979344000 | -3.162550000 | 1.176644000  |
| H | 5.847516000  | -4.717191000 | 1.243584000  |
| H | -7.694966000 | 0.673080000  | 0.119762000  |
| H | -7.994203000 | -1.708918000 | 0.847501000  |
| H | -6.511698000 | 2.889326000  | 1.098234000  |
| H | -5.460989000 | 3.849005000  | -0.007289000 |
| H | -4.716719000 | 2.864674000  | 1.303581000  |

## PMIDA

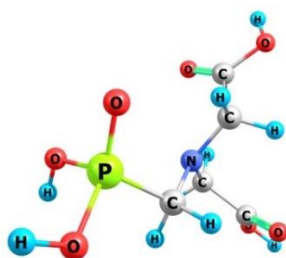

$E = -1118.158188107$

|   |             |              |              |
|---|-------------|--------------|--------------|
| P | 1.203739000 | -4.492116000 | 10.641313000 |
| C | 2.699853000 | -3.639592000 | 11.274591000 |
| H | 3.519238000 | -4.390413000 | 11.316458000 |
| H | 2.998494000 | -2.902083000 | 10.507353000 |
| N | 2.436144000 | -2.959828000 | 12.538658000 |
| C | 2.396917000 | -3.817456000 | 13.713843000 |
| C | 1.537299000 | -3.241106000 | 14.838027000 |
| O | 1.828764000 | -3.829208000 | 16.011528000 |
| H | 1.227895000 | -3.479863000 | 16.701953000 |
| O | 0.687524000 | -2.385123000 | 14.714880000 |
| H | 1.923157000 | -4.780265000 | 13.440843000 |
| H | 3.399282000 | -4.070795000 | 14.124085000 |
| C | 3.121959000 | -1.693870000 | 12.713959000 |
| C | 4.650336000 | -1.780137000 | 12.813999000 |
| O | 5.194421000 | -0.568097000 | 13.010429000 |
| H | 6.168857000 | -0.656665000 | 13.065167000 |
| O | 5.300476000 | -2.800684000 | 12.720282000 |
| H | 2.749110000 | -1.178461000 | 13.618873000 |
| H | 2.881439000 | -1.009589000 | 11.876550000 |
| O | 0.591447000 | -5.525158000 | 11.538813000 |
| O | 0.091147000 | -3.355070000 | 10.286954000 |
| H | 0.391605000 | -2.665112000 | 9.664821000  |
| O | 1.776607000 | -5.050400000 | 9.222418000  |
| H | 1.151968000 | -5.644950000 | 8.761833000  |



# PMIDA-Dox

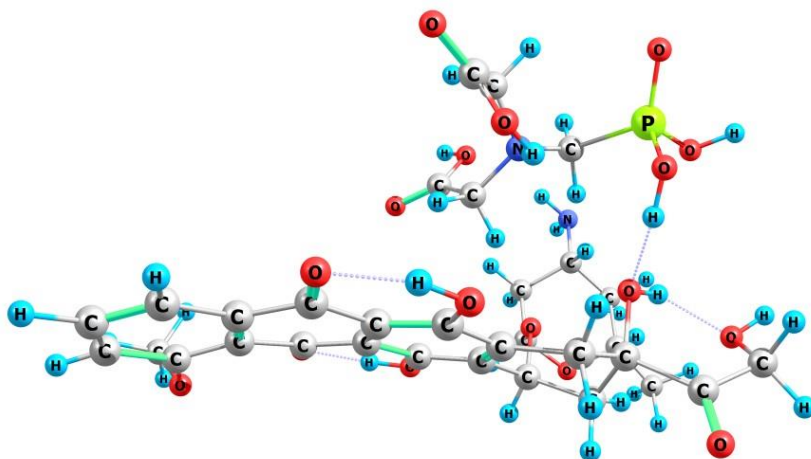

$E=-3044.139790198$

|   |              |              |              |   |              |              |              |
|---|--------------|--------------|--------------|---|--------------|--------------|--------------|
| P | 1.161815000  | -4.524886000 | 11.055868000 | O | 0.917128000  | -1.327181000 | 9.452176000  |
| C | 2.741884000  | -3.661346000 | 11.430340000 | H | 1.155624000  | -1.686648000 | 8.567810000  |
| H | 3.555470000  | -4.415911000 | 11.446184000 | C | 1.150297000  | 0.968153000  | 8.542419000  |
| H | 2.953252000  | -2.983788000 | 10.584161000 | H | 0.583255000  | 1.916077000  | 8.484895000  |
| N | 2.636536000  | -2.874547000 | 12.662380000 | C | -0.154850000 | 0.459015000  | 10.612460000 |
| C | 2.647835000  | -3.622319000 | 13.921403000 | C | 2.234979000  | 1.347780000  | 10.811422000 |
| C | 1.522792000  | -3.178310000 | 14.873060000 | C | 1.025108000  | 0.987156000  | 11.401559000 |
| O | 0.554305000  | -2.452982000 | 14.294946000 | C | 4.495789000  | 0.445917000  | 8.216472000  |
| H | 0.807092000  | -2.354919000 | 13.343229000 | C | 5.476691000  | -0.729582000 | 8.305486000  |
| O | 1.480573000  | -3.480321000 | 16.045197000 | C | 4.909778000  | -1.991221000 | 7.612733000  |
| H | 2.465366000  | -4.694478000 | 13.720739000 | C | 4.553201000  | -1.639031000 | 6.155129000  |
| H | 3.608709000  | -3.557349000 | 14.471745000 | C | 3.576342000  | -0.440648000 | 6.130412000  |
| C | 3.369790000  | -1.612788000 | 12.688992000 | C | 3.316075000  | 1.836785000  | 11.616319000 |
| C | 4.901068000  | -1.651461000 | 12.813542000 | C | 0.854235000  | 1.137814000  | 12.811835000 |
| O | 5.457176000  | -2.723798000 | 12.224421000 | C | 3.170785000  | 1.943734000  | 13.017825000 |
| H | 6.431604000  | -2.679124000 | 12.324352000 | C | 1.918713000  | 1.602599000  | 13.613275000 |
| O | 5.540005000  | -0.769859000 | 13.345615000 | C | 3.257293000  | 0.067438000  | 4.725494000  |
| H | 3.008973000  | -0.987331000 | 13.524001000 | C | 4.318443000  | 2.386358000  | 13.840213000 |
| H | 3.147870000  | -1.051814000 | 11.761234000 | C | 1.724123000  | 1.742352000  | 15.056235000 |
| O | 0.745427000  | -5.604160000 | 12.011135000 | C | 4.146925000  | 2.464163000  | 15.315344000 |
| O | 0.022319000  | -3.373833000 | 10.977851000 | C | 2.875910000  | 2.181192000  | 15.892480000 |
| H | 0.282876000  | -2.583602000 | 10.421137000 | C | 5.215669000  | 2.839774000  | 16.192652000 |
| O | 1.479607000  | -4.989318000 | 9.524496000  | C | 2.658108000  | 2.291525000  | 17.271990000 |
| H | 0.844178000  | -5.644460000 | 9.174006000  | C | 4.969638000  | 2.948391000  | 17.580668000 |
| O | 3.408205000  | 0.154745000  | 9.083791000  | C | 3.705297000  | 2.682999000  | 18.107781000 |
| O | 4.080247000  | 0.688604000  | 6.879279000  | C | 7.541072000  | 3.387040000  | 16.512414000 |
| O | 5.773749000  | -1.371510000 | 5.458317000  | H | 1.386426000  | 0.676979000  | 7.507187000  |
| O | 4.450074000  | 2.178326000  | 10.991064000 | H | -0.671809000 | -0.329723000 | 11.188359000 |
| H | 5.087470000  | 2.473187000  | 11.710137000 | H | -0.901216000 | 1.265181000  | 10.480860000 |
| O | -0.341393000 | 0.813951000  | 13.323533000 | H | 4.973046000  | 1.393667000  | 8.534682000  |
| H | -0.291816000 | 0.984851000  | 14.308340000 | H | 6.420675000  | -0.430842000 | 7.812370000  |
| O | 5.391196000  | 2.692526000  | 13.285590000 | H | 5.707098000  | -0.936136000 | 9.367406000  |
| O | 0.623569000  | 1.494336000  | 15.588836000 | H | 3.958999000  | -2.257467000 | 8.116877000  |
| O | 6.429663000  | 3.076034000  | 15.665885000 | H | 4.032695000  | -2.508425000 | 5.697500000  |
| N | 5.774391000  | -3.174309000 | 7.652897000  | H | 2.635591000  | -0.801512000 | 6.593736000  |
| C | 2.459782000  | 1.212900000  | 9.309931000  | H | 2.524059000  | 0.892868000  | 4.768259000  |
| H | 2.888340000  | 2.165472000  | 8.940498000  | H | 4.167436000  | 0.443213000  | 4.222956000  |
| C | 0.238818000  | -0.074644000 | 9.233891000  | H | 2.822626000  | -0.742566000 | 4.111644000  |
| C | -1.012247000 | -0.310439000 | 8.342363000  | H | 6.049169000  | -3.368628000 | 8.621842000  |
| C | -0.993853000 | -1.478675000 | 7.347308000  | H | 6.649573000  | -2.957638000 | 7.162463000  |
| H | -1.670627000 | -1.214584000 | 6.511507000  | H | 5.621321000  | -1.487232000 | 4.506554000  |
| H | -1.445219000 | -2.344487000 | 7.882991000  | H | 1.668144000  | 2.063151000  | 17.676582000 |
| O | 0.326618000  | -1.771365000 | 6.893882000  | H | 5.770873000  | 3.251111000  | 18.259577000 |
| H | 0.319946000  | -2.609467000 | 6.398795000  | H | 3.538927000  | 2.782658000  | 19.186948000 |
| O | -2.001824000 | 0.387238000  | 8.434141000  | H | 7.388337000  | 4.339227000  | 17.056847000 |
|   |              |              |              | H | 8.409125000  | 3.488293000  | 15.841661000 |
|   |              |              |              | H | 7.737169000  | 2.577814000  | 17.241330000 |

# PMIDA-Dox salt A

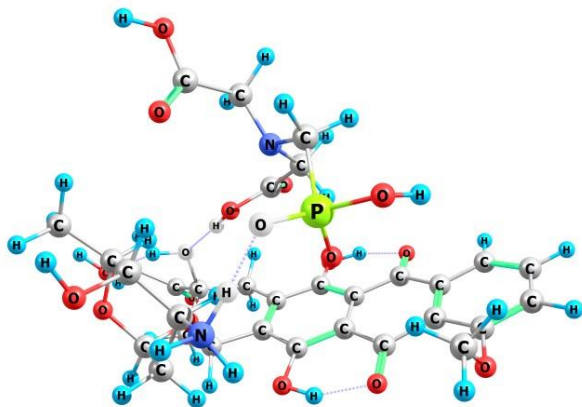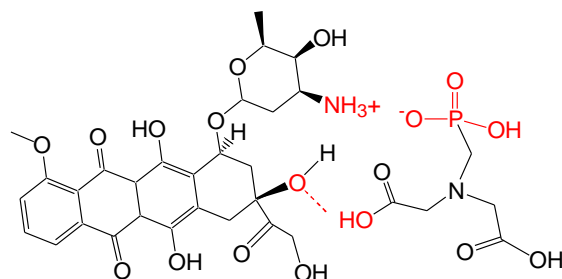

$E=-3044.156612084$

|   |              |              |              |
|---|--------------|--------------|--------------|
| O | -2.440315000 | -0.070689000 | 14.145249000 |
| H | -3.160904000 | -0.681870000 | 14.378400000 |
| O | -0.025539000 | 1.877608000  | 15.819479000 |
| O | 0.081233000  | -0.675542000 | 13.403113000 |
| H | -0.883418000 | -0.800847000 | 13.266728000 |
| C | -0.203467000 | 1.667395000  | 12.605886000 |
| H | -0.022226000 | 2.705814000  | 12.944165000 |
| C | 1.811882000  | 0.894817000  | 13.907969000 |
| C | 2.007790000  | 1.264531000  | 11.394234000 |
| C | 2.594793000  | 0.944866000  | 12.614065000 |
| C | -1.116837000 | 0.421522000  | 9.718098000  |
| C | -0.673753000 | 0.342026000  | 8.246554000  |
| C | -0.054921000 | -1.037095000 | 7.998992000  |
| C | -1.061015000 | -2.150697000 | 8.344685000  |
| C | -1.565901000 | -1.951168000 | 9.795118000  |
| C | 2.805145000  | 1.351553000  | 10.207057000 |
| C | 4.001058000  | 0.674647000  | 12.673014000 |
| C | 4.169618000  | 0.994311000  | 10.239392000 |
| C | 4.767227000  | 0.639997000  | 11.488458000 |
| C | -2.705383000 | -2.894944000 | 10.165699000 |
| C | 4.944670000  | 0.987268000  | 8.987144000  |
| C | 6.171987000  | 0.236520000  | 11.546885000 |
| C | 6.330479000  | 0.437279000  | 9.016340000  |
| C | 6.925556000  | 0.101161000  | 10.266127000 |
| C | 7.112123000  | 0.273870000  | 7.837438000  |
| C | 3.195480000  | -3.271715000 | 7.573051000  |
| C | 3.252323000  | -4.646654000 | 8.824968000  |
| H | 4.315417000  | -4.945733000 | 8.988395000  |
| H | 2.756665000  | -5.508921000 | 8.345366000  |
| N | 2.573153000  | -4.316921000 | 10.086465000 |
| C | 2.015723000  | -5.479648000 | 10.759732000 |
| C | 0.733718000  | -6.011320000 | 10.120481000 |
| O | 0.380482000  | -7.181468000 | 10.680751000 |
| H | -0.463004000 | -7.484065000 | 10.284322000 |
| O | 0.088587000  | -5.472031000 | 9.246561000  |
| H | 2.734523000  | -6.328285000 | 10.854965000 |
| H | 1.736413000  | -5.215863000 | 11.799440000 |
| C | 3.420546000  | -3.517208000 | 10.967506000 |
| C | 2.688574000  | -2.733359000 | 12.054486000 |
| O | 1.484757000  | -2.305159000 | 11.682006000 |
| H | 1.068559000  | -1.710998000 | 12.370160000 |
| O | 3.198209000  | -2.480491000 | 13.131718000 |
| H | 3.926320000  | -2.751123000 | 10.348098000 |
| H | 4.218067000  | -4.112205000 | 11.469735000 |
| O | 1.884040000  | -3.377967000 | 6.772115000  |
| O | 3.558996000  | -1.931671000 | 8.203229000  |

|   |              |              |              |
|---|--------------|--------------|--------------|
| H | 0.965367000  | -0.409307000 | 6.265434000  |
| O | 4.366251000  | -3.765279000 | 6.499139000  |
| H | 5.262183000  | -3.585266000 | 6.839553000  |
| O | 0.020935000  | 0.299313000  | 10.566482000 |
| O | -2.037338000 | -0.601842000 | 10.023502000 |
| O | -2.106421000 | -2.092155000 | 7.368752000  |
| O | 2.208742000  | 1.770061000  | 9.083861000  |
| H | 2.916110000  | 1.769193000  | 8.370323000  |
| O | 4.535409000  | 0.436454000  | 13.876724000 |
| H | 5.499040000  | 0.213138000  | 13.727105000 |
| O | 4.441494000  | 1.431572000  | 7.936882000  |
| O | 6.733300000  | -0.015669000 | 12.632134000 |
| O | 6.657853000  | 0.594953000  | 6.592327000  |
| N | 0.409201000  | -1.213515000 | 6.588301000  |
| H | -0.398495000 | -1.320248000 | 5.955584000  |
| C | 0.504269000  | 1.461047000  | 11.257590000 |
| H | 0.323360000  | 2.360051000  | 10.634838000 |
| C | 0.301715000  | 0.709561000  | 13.715892000 |
| C | -0.456237000 | 1.060624000  | 15.030792000 |
| C | -1.771708000 | 0.333273000  | 15.335289000 |
| H | -2.391426000 | 1.015479000  | 15.951893000 |
| H | -1.501861000 | -0.536740000 | 15.976088000 |
| C | 8.245144000  | -0.370920000 | 10.334053000 |
| C | 8.432241000  | -0.202220000 | 7.930789000  |
| C | 8.998720000  | -0.519999000 | 9.167243000  |
| C | 5.861342000  | -0.399317000 | 5.923834000  |
| H | -1.293691000 | 1.562411000  | 12.465026000 |
| H | 2.196665000  | 0.081526000  | 14.547326000 |
| H | 1.983604000  | 1.832451000  | 14.470571000 |
| H | -1.647552000 | 1.374911000  | 9.912466000  |
| H | -1.556656000 | 0.491871000  | 7.597892000  |
| H | 0.054025000  | 1.143796000  | 8.037081000  |
| H | 0.842184000  | -1.160302000 | 8.628785000  |
| H | -0.539272000 | -3.127314000 | 8.302735000  |
| H | -0.700882000 | -2.148423000 | 10.457431000 |
| H | -3.008266000 | -2.736423000 | 11.216143000 |
| H | -3.585234000 | -2.725407000 | 9.519041000  |
| H | -2.380486000 | -3.945048000 | 10.053407000 |
| H | 1.039814000  | -2.108880000 | 6.544122000  |
| H | -2.492757000 | -2.977836000 | 7.268750000  |
| H | 8.670557000  | -0.617077000 | 11.311589000 |
| H | 9.005227000  | -0.312899000 | 7.002723000  |
| H | 10.030378000 | -0.887762000 | 9.219333000  |
| H | 6.477367000  | -1.287784000 | 5.675752000  |
| H | 5.499133000  | 0.059529000  | 4.988470000  |
| H | 5.001133000  | -0.718331000 | 6.538015000  |

## PMIDA-Dox salt B

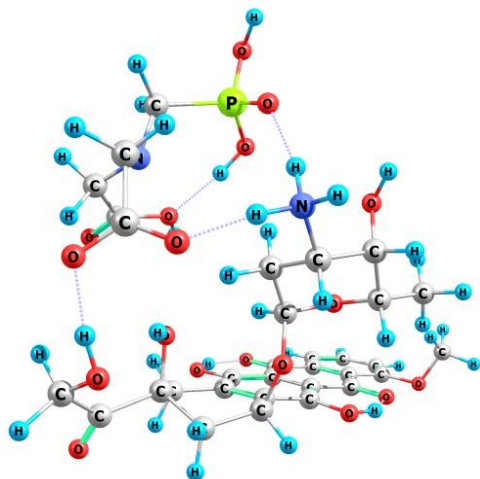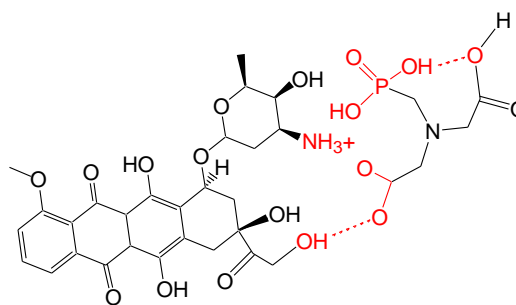

$E = -3044.146658006$

|   |              |              |              |
|---|--------------|--------------|--------------|
| O | -2.440315000 | -0.070689000 | 14.145249000 |
| H | -3.160904000 | -0.681870000 | 14.378400000 |
| O | -0.025539000 | 1.877608000  | 15.819479000 |
| O | 0.081233000  | -0.675542000 | 13.403113000 |
| H | -0.883418000 | -0.800847000 | 13.266728000 |
| C | -0.203467000 | 1.667395000  | 12.605886000 |
| H | -0.022226000 | 2.705814000  | 12.944165000 |
| C | 1.811882000  | 0.894817000  | 13.907969000 |
| C | 2.007790000  | 1.264531000  | 11.394234000 |
| C | 2.594793000  | 0.944866000  | 12.614065000 |
| C | -1.116837000 | 0.421522000  | 9.718098000  |
| C | -0.673753000 | 0.342026000  | 8.246554000  |
| C | -0.054921000 | -1.037095000 | 7.998992000  |
| C | -1.061015000 | -2.150697000 | 8.344685000  |
| C | -1.565901000 | -1.951168000 | 9.795118000  |
| C | 2.805145000  | 1.351553000  | 10.207057000 |
| C | 4.001058000  | 0.674647000  | 12.673014000 |
| C | 4.169618000  | 0.994311000  | 10.239392000 |
| C | 4.767227000  | 0.639997000  | 11.488458000 |
| C | -2.705383000 | -2.894944000 | 10.165699000 |
| C | 4.944670000  | 0.987268000  | 8.987144000  |
| C | 6.171987000  | 0.236520000  | 11.546885000 |
| C | 6.330479000  | 0.437279000  | 9.016340000  |
| C | 6.925556000  | 0.101161000  | 10.266127000 |
| C | 7.112123000  | 0.273870000  | 7.837438000  |
| P | 3.195480000  | -3.271715000 | 7.573051000  |
| C | 3.252323000  | -4.646654000 | 8.824968000  |
| H | 4.315417000  | -4.945733000 | 8.988395000  |
| H | 2.756665000  | -5.508921000 | 8.345366000  |
| N | 2.573153000  | -4.316921000 | 10.086465000 |
| C | 2.015723000  | -5.479648000 | 10.759732000 |
| C | 0.733718000  | -6.011320000 | 10.120481000 |
| O | 0.380482000  | -7.181468000 | 10.680751000 |
| H | -0.463004000 | -7.484065000 | 10.284322000 |
| O | 0.088587000  | -5.472031000 | 9.246561000  |
| H | 2.734523000  | -6.328285000 | 10.854965000 |
| H | 1.736413000  | -5.215863000 | 11.799440000 |
| C | 3.420546000  | -3.517208000 | 10.967506000 |
| C | 2.688574000  | -2.733359000 | 12.054486000 |
| O | 1.484757000  | -2.305159000 | 11.682006000 |
| H | 1.068559000  | -1.710998000 | 12.370160000 |
| O | 3.198209000  | -2.480491000 | 13.131718000 |
| H | 3.926320000  | -2.751123000 | 10.348098000 |
| H | 4.218067000  | -4.112205000 | 11.469735000 |

|   |              |              |              |
|---|--------------|--------------|--------------|
| O | 1.884040000  | -3.377967000 | 6.772115000  |
| O | 3.558996000  | -1.931671000 | 8.203229000  |
| H | 0.965367000  | -0.409307000 | 6.265434000  |
| O | 4.366251000  | -3.765279000 | 6.499139000  |
| H | 5.262183000  | -3.585266000 | 6.839553000  |
| O | 0.020935000  | 0.299313000  | 10.566482000 |
| O | -2.037338000 | -0.601842000 | 10.023502000 |
| O | -2.106421000 | -2.092155000 | 7.368752000  |
| O | 2.208742000  | 1.770061000  | 9.083861000  |
| H | 2.916110000  | 1.769193000  | 8.370323000  |
| O | 4.535409000  | 0.436454000  | 13.876724000 |
| H | 5.499040000  | 0.213138000  | 13.727105000 |
| O | 4.441494000  | 1.431572000  | 7.936882000  |
| O | 6.733300000  | -0.015669000 | 12.632134000 |
| O | 6.657853000  | 0.594953000  | 6.592327000  |
| N | 0.409201000  | -1.213515000 | 6.588301000  |
| H | -0.398495000 | -1.320248000 | 5.955584000  |
| C | 0.504269000  | 1.461047000  | 11.257590000 |
| H | 0.323360000  | 2.360051000  | 10.634838000 |
| C | 0.301715000  | 0.709561000  | 13.715892000 |
| C | -0.456237000 | 1.060624000  | 15.030792000 |
| C | -1.771708000 | 0.333273000  | 15.335289000 |
| H | -2.391426000 | 1.015479000  | 15.951893000 |
| H | -1.501861000 | -0.536740000 | 15.976088000 |
| C | 8.245144000  | -0.370920000 | 10.334053000 |
| C | 8.432241000  | -0.202220000 | 7.930789000  |
| C | 8.998720000  | -0.519999000 | 9.167243000  |
| C | 5.861342000  | -0.399317000 | 5.923834000  |
| H | -1.293691000 | 1.562411000  | 12.465026000 |
| H | 2.196665000  | 0.081526000  | 14.547326000 |
| H | 1.983604000  | 1.832451000  | 14.470571000 |
| H | -1.647552000 | 1.374911000  | 9.912466000  |
| H | -1.556656000 | 0.491871000  | 7.597892000  |
| H | 0.054025000  | 1.143796000  | 8.037081000  |
| H | 0.842184000  | -1.160302000 | 8.628785000  |
| H | -0.539272000 | -3.127314000 | 8.302735000  |
| H | -0.700882000 | -2.148423000 | 10.457431000 |
| H | -3.008266000 | -2.736423000 | 11.216143000 |
| H | -3.585234000 | -2.725407000 | 9.519041000  |
| H | -2.380486000 | -3.945048000 | 10.053407000 |
| H | 1.039814000  | -2.108880000 | 6.544122000  |
| H | -2.492757000 | -2.977836000 | 7.268750000  |
| H | 8.670557000  | -0.617077000 | 11.311589000 |
| H | 9.005227000  | -0.312899000 | 7.002723000  |
| H | 10.030378000 | -0.887762000 | 9.219333000  |
| H | 6.477367000  | -1.287784000 | 5.675752000  |
| H | 5.499133000  | 0.059529000  | 4.988470000  |
| H | 5.001133000  | -0.718331000 | 6.538015000  |

# SiO<sub>2</sub> Cluster (Si<sub>10</sub>H<sub>18</sub>O<sub>29</sub>)

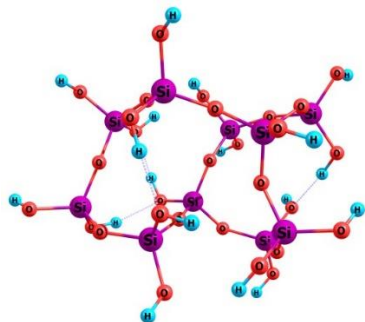

**E = -5085.302029576**

|    |              |               |             |
|----|--------------|---------------|-------------|
| Si | -0.318690000 | -1.001683000  | 3.992670000 |
| O  | -0.639937000 | -1.855862000  | 5.378891000 |
| Si | 0.132554000  | -3.137809000  | 6.082642000 |
| O  | 1.752654000  | -2.940516000  | 5.797000000 |
| Si | 3.080434000  | -2.231326000  | 6.486816000 |
| O  | 4.219703000  | -1.984795000  | 5.313277000 |
| Si | 3.683109000  | -6.255534000  | 6.021667000 |
| Si | 4.490358000  | -1.931237000  | 3.685517000 |
| Si | 3.261806000  | -4.693608000  | 3.195308000 |
| O  | 4.325843000  | -3.442906000  | 3.026002000 |
| O  | 3.444528000  | -5.302998000  | 4.705915000 |
| O  | 3.672737000  | -7.842262000  | 5.581973000 |
| Si | 3.356023000  | -8.655899000  | 4.162151000 |
| O  | 1.879649000  | -8.120618000  | 3.651285000 |
| Si | 0.538923000  | -7.680553000  | 2.816770000 |
| O  | 1.721498000  | -4.167605000  | 2.971493000 |
| Si | 0.676216000  | -3.344723000  | 1.986334000 |
| O  | 0.006324000  | -2.074846000  | 2.775405000 |
| O  | -0.385123000 | -4.524495000  | 5.386623000 |
| Si | -0.790015000 | -6.117031000  | 5.220298000 |
| O  | -0.358918000 | -6.597767000  | 3.690324000 |
| O  | 3.367230000  | -10.243511000 | 4.603172000 |
| H  | 3.309047000  | -10.897122000 | 3.885710000 |
| O  | -0.376520000 | -8.986790000  | 2.387776000 |
| H  | -0.757079000 | -9.518668000  | 3.107533000 |
| O  | 1.433044000  | -2.698589000  | 0.665264000 |
| H  | 1.910126000  | -3.296120000  | 0.064781000 |
| O  | 3.638793000  | -5.833935000  | 2.040588000 |

|   |              |              |             |
|---|--------------|--------------|-------------|
| H | 2.848175000  | -6.249401000 | 1.619002000 |
| O | 3.347582000  | -0.876977000 | 3.074740000 |
| H | 3.308676000  | -0.786879000 | 2.104583000 |
| O | 5.983563000  | -1.344952000 | 3.323765000 |
| H | 6.741370000  | -1.941431000 | 3.453874000 |
| O | -0.206414000 | -3.215041000 | 7.699647000 |
| H | -0.047194000 | -2.414829000 | 8.229190000 |
| O | 3.669986000  | -3.229643000 | 7.672746000 |
| H | 4.511479000  | -3.690537000 | 7.491986000 |
| O | 0.944022000  | 0.041413000  | 4.217355000 |
| H | 1.804565000  | -0.198945000 | 3.799975000 |
| O | -1.721417000 | -0.175260000 | 3.716935000 |
| H | -1.692085000 | 0.499674000  | 3.017213000 |
| O | -0.486578000 | -4.428017000 | 1.477732000 |
| H | -0.955176000 | -4.897018000 | 2.193444000 |
| O | 2.669839000  | -0.817840000 | 7.243279000 |
| H | 2.183539000  | -0.166131000 | 6.706320000 |
| O | -2.431268000 | -6.323924000 | 5.249525000 |
| H | -2.891152000 | -6.025249000 | 6.052442000 |
| O | -0.069239000 | -7.046733000 | 6.371494000 |
| H | 0.800482000  | -6.747882000 | 6.724672000 |
| O | 2.455570000  | -6.075776000 | 7.143536000 |
| H | 2.498040000  | -5.241638000 | 7.652888000 |
| O | 5.134417000  | -5.757864000 | 6.647822000 |
| H | 5.470060000  | -6.243933000 | 7.421805000 |
| O | 1.068542000  | -6.952018000 | 1.410551000 |
| H | 0.477811000  | -6.260222000 | 1.046366000 |
| O | 4.502545000  | -8.392555000 | 3.001457000 |
| H | 4.453636000  | -7.516312000 | 2.560334000 |

# SiO<sub>2</sub>-APS

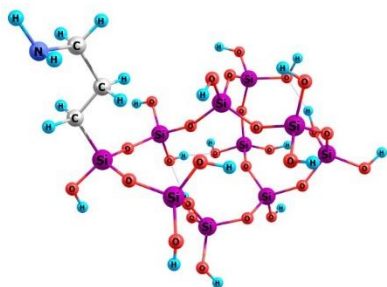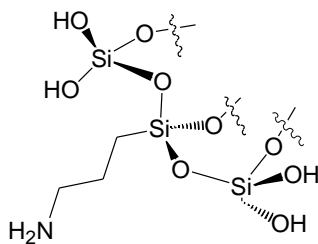

**E** = -5183.158474308

|    |              |              |              |
|----|--------------|--------------|--------------|
| Si | -0.714376000 | 1.507781000  | 5.460559000  |
| O  | -0.073815000 | 0.125515000  | 6.104052000  |
| Si | -0.363793000 | -1.029700000 | 7.252865000  |
| O  | -1.545870000 | -0.514943000 | 8.295565000  |
| Si | -3.186124000 | -0.415245000 | 8.358550000  |
| O  | -3.644405000 | 1.072157000  | 8.905963000  |
| Si | -1.427140000 | 0.190387000  | 12.342931000 |
| Si | -3.614386000 | 2.709126000  | 9.060132000  |
| Si | -0.842003000 | 2.578695000  | 10.269330000 |
| O  | -2.382607000 | 3.155530000  | 10.071592000 |
| O  | -0.872589000 | 1.243925000  | 11.206545000 |
| O  | -0.262016000 | -0.095372000 | 13.462984000 |
| Si | 1.226360000  | 0.190013000  | 14.159286000 |
| C  | 1.188170000  | 1.676325000  | 15.276738000 |
| H  | 0.373784000  | 1.543696000  | 16.018483000 |
| H  | 2.128071000  | 1.709239000  | 15.860238000 |
| C  | 1.015349000  | 3.015189000  | 14.526941000 |
| H  | 1.806948000  | 3.108991000  | 13.754542000 |
| H  | 0.053563000  | 3.032351000  | 13.975695000 |
| C  | 1.072061000  | 4.253481000  | 15.440163000 |
| H  | 0.834426000  | 5.150794000  | 14.821121000 |
| H  | 0.264660000  | 4.179602000  | 16.197415000 |
| N  | 2.356692000  | 4.346967000  | 16.153714000 |
| H  | 3.100395000  | 4.567599000  | 15.480700000 |
| H  | 2.337367000  | 5.142998000  | 16.800902000 |
| O  | 2.384780000  | 0.440056000  | 12.981722000 |
| Si | 2.672122000  | 0.365392000  | 11.361440000 |
| O  | -0.225483000 | 2.218183000  | 8.771160000  |
| Si | 0.643072000  | 3.111211000  | 7.677137000  |
| O  | 0.044515000  | 2.809243000  | 6.168659000  |
| O  | 1.010461000  | -1.303734000 | 8.112819000  |
| Si | 1.307834000  | -1.918392000 | 9.635984000  |
| O  | 1.605572000  | -0.690759000 | 10.690125000 |

|   |              |              |              |
|---|--------------|--------------|--------------|
| O | 1.624045000  | -1.146847000 | 15.062867000 |
| H | 1.570245000  | -2.013182000 | 14.622268000 |
| O | 4.215858000  | -0.140166000 | 11.023563000 |
| H | 4.321112000  | -1.097313000 | 10.887759000 |
| O | 0.015805000  | 3.829045000  | 10.948139000 |
| H | 0.929794000  | 3.564910000  | 11.183571000 |
| O | -3.380647000 | 3.289905000  | 7.513421000  |
| H | -3.340833000 | 4.254219000  | 7.385351000  |
| O | -5.030602000 | 3.318082000  | 9.633329000  |
| H | -5.205249000 | 3.241951000  | 10.586883000 |
| O | -0.773290000 | -2.450566000 | 6.509361000  |
| H | -1.569876000 | -2.440926000 | 5.950606000  |
| O | -3.639818000 | -1.550443000 | 9.494052000  |
| H | -4.578823000 | -1.574164000 | 9.751038000  |
| O | -2.356050000 | 1.541062000  | 5.707193000  |
| H | -2.743151000 | 2.285247000  | 6.231837000  |
| O | -0.356149000 | 1.460838000  | 3.849655000  |
| H | -0.765761000 | 2.146363000  | 3.295035000  |
| O | 2.222111000  | 2.585592000  | 7.855604000  |
| H | 2.896835000  | 3.117258000  | 7.403540000  |
| O | -3.852233000 | -0.756255000 | 6.881547000  |
| H | -3.581874000 | -0.114616000 | 6.190128000  |
| O | 2.682362000  | -2.837494000 | 9.564365000  |
| H | 2.772087000  | -3.414697000 | 8.787499000  |
| O | 0.014261000  | -2.781068000 | 10.174145000 |
| H | -0.657736000 | -2.277376000 | 10.690289000 |
| O | -1.774375000 | -1.293291000 | 11.674529000 |
| H | -2.542068000 | -1.372006000 | 11.061549000 |
| O | -2.761501000 | 0.913565000  | 13.015837000 |
| H | -3.212522000 | 0.400115000  | 13.707509000 |
| O | 2.501246000  | 1.925943000  | 10.807661000 |
| H | 2.633294000  | 2.062039000  | 9.843189000  |
| O | 0.493612000  | 4.745997000  | 7.899885000  |
| H | 0.598740000  | 5.053568000  | 8.817753000  |

## SiO<sub>2</sub>-2APS

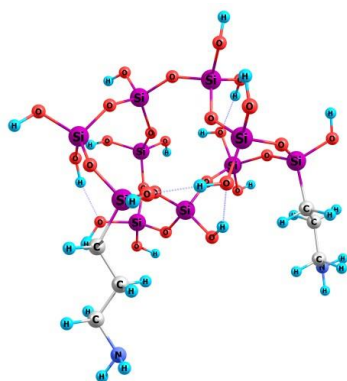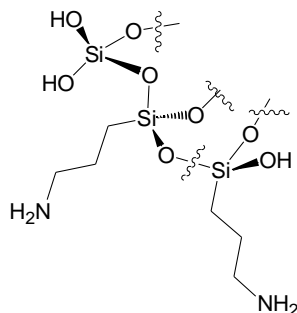

**E=-5281.0163333778**

|    |              |               |              |
|----|--------------|---------------|--------------|
| Si | -0.332740000 | -1.632924000  | 3.848050000  |
| O  | -0.623885000 | -2.750694000  | 5.030770000  |
| Si | 0.162306000  | -3.467481000  | 6.295350000  |
| O  | 1.781107000  | -3.479329000  | 5.953639000  |
| Si | 3.081262000  | -2.536369000  | 6.322213000  |
| O  | 4.127723000  | -2.489364000  | 5.055624000  |
| Si | 3.779471000  | -6.602018000  | 5.459800000  |
| Si | 4.594604000  | -2.269477000  | 3.492963000  |
| Si | 3.238462000  | -4.873325000  | 2.779792000  |
| O  | 4.431370000  | -3.716737000  | 2.696208000  |
| O  | 3.284840000  | -5.642180000  | 4.224109000  |
| O  | 3.224447000  | -8.135987000  | 5.257698000  |
| Si | 2.673031000  | -9.307815000  | 4.207159000  |
| C  | 3.888211000  | -9.506350000  | 2.806949000  |
| H  | 3.548409000  | -10.325897000 | 2.142110000  |
| H  | 3.825385000  | -8.579703000  | 2.200592000  |
| C  | 5.348901000  | -9.726070000  | 3.252162000  |
| H  | 5.664334000  | -8.916096000  | 3.937093000  |
| H  | 5.427251000  | -10.668624000 | 3.832420000  |
| C  | 6.335664000  | -9.770326000  | 2.076266000  |
| H  | 6.034074000  | -10.591777000 | 1.383516000  |
| H  | 6.237129000  | -8.831507000  | 1.493771000  |
| N  | 7.723593000  | -9.872397000  | 2.552954000  |
| H  | 7.858312000  | -10.785460000 | 3.003312000  |
| H  | 8.359732000  | -9.879656000  | 1.748618000  |
| O  | 1.163798000  | -8.894292000  | 3.632917000  |
| Si | 0.189942000  | -7.643298000  | 3.177521000  |
| O  | 1.805869000  | -4.073723000  | 2.606369000  |
| Si | 0.800869000  | -3.356368000  | 1.502335000  |
| C  | 1.659735000  | -2.313483000  | 0.214337000  |
| H  | 0.868544000  | -1.764081000  | -0.337927000 |
| H  | 2.211921000  | -1.538624000  | 0.782529000  |
| C  | 2.613895000  | -3.004293000  | -0.781114000 |
| H  | 3.383032000  | -3.599279000  | -0.251525000 |
| H  | 2.047970000  | -3.725591000  | -1.406135000 |
| C  | 3.326477000  | -1.989153000  | -1.689798000 |
| H  | 2.555948000  | -1.364113000  | -2.201510000 |
| H  | 3.908195000  | -1.290995000  | -1.052635000 |
| N  | 4.259404000  | -2.650677000  | -2.612110000 |
| H  | 3.722888000  | -3.193485000  | -3.299397000 |

|    |              |               |              |
|----|--------------|---------------|--------------|
| H  | 4.752140000  | -1.942186000  | -3.166323000 |
| O  | -0.212809000 | -2.369612000  | 2.376070000  |
| O  | -0.415002000 | -4.986872000  | 6.506354000  |
| Si | -0.373180000 | -6.546820000  | 5.961810000  |
| O  | 0.158513000  | -6.517301000  | 4.395679000  |
| O  | 2.532369000  | -10.740466000 | 5.040220000  |
| H  | 1.858956000  | -10.778277000 | 5.741160000  |
| O  | -1.358085000 | -8.168803000  | 2.887493000  |
| H  | -1.945548000 | -8.121729000  | 3.665337000  |
| O  | 3.500366000  | -5.949247000  | 1.549910000  |
| H  | 2.719562000  | -6.526199000  | 1.399153000  |
| O  | 3.592700000  | -1.065205000  | 2.906381000  |
| H  | 3.930488000  | -0.494434000  | 2.194138000  |
| O  | 6.143955000  | -1.732110000  | 3.356389000  |
| H  | 6.849206000  | -2.402221000  | 3.355778000  |
| O  | -0.152964000 | -2.705301000  | 7.733519000  |
| H  | 0.199463000  | -1.804890000  | 7.840700000  |
| O  | 3.807397000  | -3.313479000  | 7.600488000  |
| H  | 4.729557000  | -3.083463000  | 7.810266000  |
| O  | 1.052329000  | -0.775275000  | 4.207370000  |
| H  | 1.828440000  | -0.791595000  | 3.601579000  |
| O  | -1.680932000 | -0.679167000  | 3.886463000  |
| H  | -1.735715000 | 0.026094000   | 3.218862000  |
| O  | -0.065087000 | -4.647752000  | 0.857328000  |
| H  | -0.651163000 | -4.483279000  | 0.097640000  |
| O  | 2.578199000  | -1.019229000  | 6.765114000  |
| H  | 2.070537000  | -0.567071000  | 6.058035000  |
| O  | -1.898135000 | -7.195331000  | 5.866724000  |
| H  | -2.360327000 | -7.410577000  | 6.694529000  |
| O  | 0.556517000  | -7.474481000  | 6.963758000  |
| H  | 1.446777000  | -7.099288000  | 7.149113000  |
| O  | 3.113439000  | -6.149770000  | 6.916439000  |
| H  | 3.329639000  | -5.259123000  | 7.267809000  |
| O  | 5.435701000  | -6.510667000  | 5.463748000  |
| H  | 5.890215000  | -7.037062000  | 6.143907000  |
| O  | 0.843484000  | -7.034308000  | 1.782923000  |
| H  | 0.392121000  | -6.252671000  | 1.371575000  |



# SiO<sub>2</sub>-PMIDA cluster A

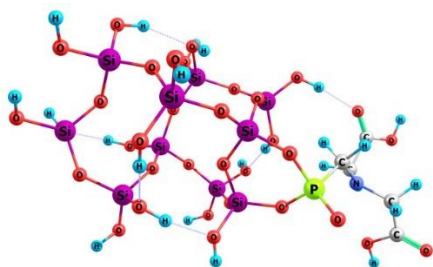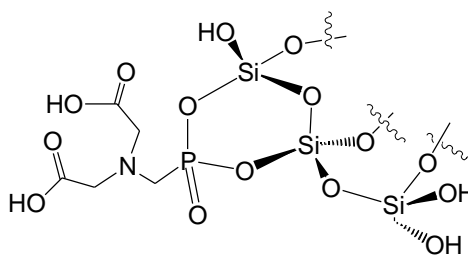

**E** = -6050.813017988

|    |              |               |             |
|----|--------------|---------------|-------------|
| Si | -0.641400000 | -1.609572000  | 4.544066000 |
| O  | -1.315586000 | -2.974117000  | 5.265194000 |
| Si | -0.922365000 | -3.921019000  | 6.556041000 |
| O  | 0.721338000  | -3.986837000  | 6.732034000 |
| Si | 1.705271000  | -3.171367000  | 7.776541000 |
| O  | 2.935506000  | -2.385206000  | 7.048860000 |
| Si | 3.501103000  | -6.574508000  | 6.161987000 |
| Si | 3.784639000  | -1.817550000  | 5.743439000 |
| Si | 3.195038000  | -4.323161000  | 3.911672000 |
| O  | 3.662995000  | -2.830679000  | 4.449397000 |
| O  | 3.036150000  | -5.308227000  | 5.220418000 |
| O  | 3.478442000  | -7.982571000  | 5.286917000 |
| Si | 2.913336000  | -8.349098000  | 3.775219000 |
| O  | 1.474252000  | -7.565634000  | 3.564292000 |
| Si | -0.125034000 | -7.842124000  | 3.255737000 |
| O  | 1.744876000  | -4.201835000  | 3.139635000 |
| Si | 0.498613000  | -3.471733000  | 2.359571000 |
| O  | 0.095249000  | -2.066782000  | 3.141457000 |
| O  | -1.568721000 | -5.402406000  | 6.400976000 |
| Si | -1.374291000 | -7.015929000  | 6.009258000 |
| O  | -1.033595000 | -7.051026000  | 4.391061000 |
| O  | 2.766972000  | -9.982129000  | 3.586852000 |
| H  | 1.845231000  | -10.307489000 | 3.579398000 |
| O  | -0.253828000 | -9.496264000  | 3.334011000 |
| H  | -1.125022000 | -9.903534000  | 3.190423000 |
| O  | 0.985165000  | -3.160739000  | 0.816987000 |
| H  | 0.319191000  | -2.782092000  | 0.217287000 |
| O  | 4.370822000  | -4.862246000  | 2.891789000 |
| H  | 4.360212000  | -5.829001000  | 2.709046000 |
| O  | 3.088642000  | -0.347362000  | 5.380865000 |
| H  | 3.452823000  | 0.134964000   | 4.616586000 |
| O  | 5.353918000  | -1.567703000  | 6.179974000 |
| H  | 5.980277000  | -2.303774000  | 6.073931000 |
| O  | -1.501768000 | -3.226139000  | 7.978166000 |
| P  | -0.878683000 | -2.048100000  | 8.934028000 |
| C  | -1.560763000 | -0.525777000  | 8.168705000 |
| H  | -1.417240000 | -0.627770000  | 7.088331000 |

|   |              |              |              |
|---|--------------|--------------|--------------|
| H | -2.658788000 | -0.576425000 | 8.340714000  |
| N | -0.944754000 | 0.709599000  | 8.628684000  |
| C | -0.585368000 | 1.656092000  | 7.569660000  |
| H | -0.031994000 | 2.503463000  | 8.004332000  |
| H | 0.080486000  | 1.148544000  | 6.850567000  |
| C | -1.794950000 | 2.175978000  | 6.774650000  |
| O | -2.103261000 | 3.445246000  | 7.039046000  |
| H | -2.888011000 | 3.710090000  | 6.511073000  |
| O | -2.447907000 | 1.493007000  | 5.998518000  |
| C | -1.517565000 | 1.270239000  | 9.843706000  |
| H | -2.391979000 | 1.939020000  | 9.670174000  |
| H | -1.898970000 | 0.440574000  | 10.468700000 |
| C | -0.558434000 | 2.046411000  | 10.749984000 |
| O | 0.726808000  | 1.978022000  | 10.379227000 |
| H | 1.263047000  | 2.504495000  | 11.008907000 |
| O | -0.943376000 | 2.654951000  | 11.727529000 |
| O | -1.200303000 | -2.226588000 | 10.380898000 |
| O | 2.292518000  | -4.332841000 | 8.809950000  |
| H | 3.021750000  | -4.088295000 | 9.408532000  |
| O | 0.437968000  | -1.043055000 | 5.656815000  |
| H | 1.275166000  | -0.590657000 | 5.397705000  |
| O | -1.819235000 | -0.535477000 | 4.148693000  |
| H | -2.069653000 | 0.145594000  | 4.814984000  |
| O | -0.838082000 | -4.475819000 | 2.319751000  |
| H | -1.418611000 | -4.488939000 | 3.102187000  |
| O | 0.724079000  | -2.093430000 | 8.620979000  |
| O | -2.810547000 | -7.811010000 | 6.195625000  |
| H | -3.139938000 | -7.907260000 | 7.105662000  |
| O | -0.238894000 | -7.747642000 | 6.942681000  |
| H | 0.668414000  | -7.381351000 | 7.068108000  |
| O | 2.391606000  | -6.802862000 | 7.382863000  |
| H | 2.341208000  | -6.063267000 | 8.033740000  |
| O | 5.023704000  | -6.216646000 | 6.697883000  |
| H | 5.436897000  | -6.857883000 | 7.301836000  |
| O | -0.572434000 | -7.290313000 | 1.770112000  |
| H | -0.749882000 | -6.323525000 | 1.745344000  |
| O | 4.060915000  | -7.735869000 | 2.727458000  |
| H | 3.988980000  | -8.017738000 | 1.797520000  |

# **SiO<sub>2</sub>-PMIDA cluster B (one free P(O)-OH)**

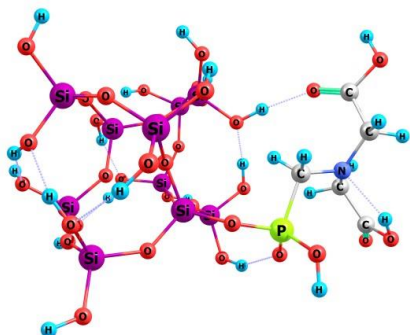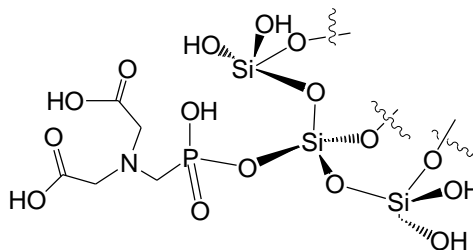

***E* = -6127.157528097**

|    |              |               |             |
|----|--------------|---------------|-------------|
| Si | 0.612961000  | -1.141127000  | 3.973450000 |
| O  | 0.291786000  | -2.203881000  | 5.200200000 |
| Si | 0.911958000  | -3.477400000  | 6.028278000 |
| O  | 2.541983000  | -3.409627000  | 6.102930000 |
| Si | 3.826737000  | -2.456457000  | 6.558945000 |
| O  | 4.837892000  | -2.310652000  | 5.260947000 |
| Si | 4.222971000  | -6.665376000  | 5.935317000 |
| Si | 5.235278000  | -2.464545000  | 3.671159000 |
| Si | 3.679274000  | -5.033259000  | 3.247993000 |
| O  | 5.010720000  | -4.052429000  | 3.217509000 |
| O  | 3.566313000  | -5.838949000  | 4.672793000 |
| O  | 4.541650000  | -8.195403000  | 5.383133000 |
| Si | 3.813969000  | -9.041524000  | 4.135821000 |
| O  | 2.224031000  | -8.571807000  | 4.061415000 |
| Si | 0.843057000  | -8.064868000  | 3.312632000 |
| O  | 2.314706000  | -4.115421000  | 3.081729000 |
| Si | 1.500556000  | -3.300704000  | 1.898489000 |
| O  | 0.786564000  | -1.968238000  | 2.544872000 |
| O  | 0.362847000  | -4.869920000  | 5.383649000 |
| Si | -0.323606000 | -6.349374000  | 5.728906000 |
| O  | -0.137576000 | -7.318639000  | 4.403209000 |
| O  | 3.964531000  | -10.622649000 | 4.581222000 |
| H  | 3.726466000  | -11.288882000 | 3.914615000 |
| O  | 0.037143000  | -9.321886000  | 2.599993000 |
| H  | -0.334499000 | -9.992809000  | 3.197963000 |
| O  | 2.581376000  | -2.736679000  | 0.762161000 |
| H  | 2.892358000  | -3.350214000  | 0.073563000 |
| O  | 3.844063000  | -6.093018000  | 1.978124000 |
| H  | 2.972875000  | -6.516185000  | 1.765522000 |
| O  | 4.248088000  | -1.432614000  | 2.807473000 |
| H  | 3.981168000  | -1.701600000  | 1.902698000 |
| O  | 6.795106000  | -2.013968000  | 3.388766000 |
| H  | 7.488084000  | -2.432948000  | 3.928004000 |
| O  | 4.621306000  | -3.136072000  | 7.834407000 |
| H  | 5.071422000  | -3.982536000  | 7.641234000 |
| O  | 2.010231000  | -0.298202000  | 4.295699000 |
| H  | 2.788793000  | -0.508098000  | 3.729520000 |
| O  | -0.724903000 | -0.182959000  | 3.936901000 |

|   |              |              |              |
|---|--------------|--------------|--------------|
| O | 5.545533000  | -5.908888000 | 6.593324000  |
| H | 6.366711000  | -5.860909000 | 6.072634000  |
| O | 1.275052000  | -7.024215000 | 2.083364000  |
| H | 0.697722000  | -6.261137000 | 1.854563000  |
| O | 4.580888000  | -8.797012000 | 2.691380000  |
| H | 4.556920000  | -7.882391000 | 2.335522000  |
| P | -1.174571000 | -3.233962000 | 8.177730000  |
| C | -1.120679000 | -4.186167000 | 9.744287000  |
| H | -0.851541000 | -5.231992000 | 9.477663000  |
| H | -0.281030000 | -3.779396000 | 10.336826000 |
| N | -2.363289000 | -4.057842000 | 10.511947000 |
| C | -3.580375000 | -4.623173000 | 9.910460000  |
| C | -4.619618000 | -3.545171000 | 9.551646000  |
| O | -4.271326000 | -2.297123000 | 9.880597000  |
| H | -3.354597000 | -2.346435000 | 10.252430000 |
| O | -5.686061000 | -3.796477000 | 9.032935000  |
| H | -3.361611000 | -5.195930000 | 8.992283000  |
| H | -4.086951000 | -5.330123000 | 10.594119000 |
| C | -2.233327000 | -4.267358000 | 11.952533000 |
| C | -2.032816000 | -5.708586000 | 12.456946000 |
| O | -1.855451000 | -6.597768000 | 11.468903000 |
| H | -1.738080000 | -7.491303000 | 11.855029000 |
| O | -2.034368000 | -6.002386000 | 13.633563000 |
| H | -3.131666000 | -3.876668000 | 12.466904000 |
| H | -1.386790000 | -3.669854000 | 12.341144000 |
| O | -2.234077000 | -3.684122000 | 7.204213000  |
| O | -1.400435000 | -1.676800000 | 8.551849000  |
| H | -0.722894000 | -1.281287000 | 9.135760000  |
| O | 0.339062000  | -3.356872000 | 7.622917000  |
| H | -0.247084000 | -4.091815000 | 0.648936000  |
| O | 3.283089000  | -0.982589000 | 7.063182000  |
| H | 2.837387000  | -0.459335000 | 6.366538000  |
| O | -1.947373000 | -6.187064000 | 5.961859000  |
| H | -2.207357000 | -5.323681000 | 6.364563000  |
| O | 0.364603000  | -7.003867000 | 7.077132000  |
| H | 1.347923000  | -6.954436000 | 7.137447000  |
| O | 3.095151000  | -6.700500000 | 7.156434000  |
| H | 3.433177000  | -6.803632000 | 8.063952000  |
| H | -0.711449000 | 0.575743000  | 3.328066000  |
| O | 0.381351000  | -4.387628000 | 1.331570000  |



## SiO<sub>2</sub>-Dox complex 1

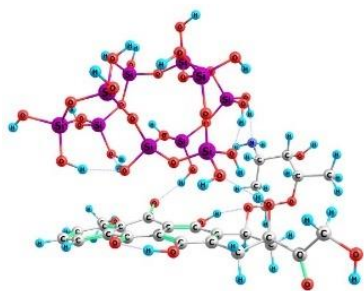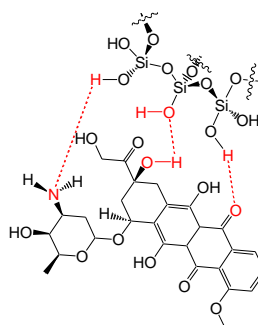

$E = -7011.299828736066$

|   |              |              |              |
|---|--------------|--------------|--------------|
| O | 3.182506000  | 0.329170000  | -0.277129000 |
| O | 2.547297000  | 2.612107000  | -0.261390000 |
| O | 5.552662000  | 0.942106000  | 1.863416000  |
| O | -0.187787000 | 3.294436000  | 0.870983000  |
| O | 2.988905000  | -2.071221000 | -1.627522000 |
| O | 7.758453000  | -3.007402000 | 0.973831000  |
| O | 8.127849000  | 2.467344000  | -0.097497000 |
| O | 8.612867000  | 3.765456000  | 2.187872000  |
| N | -0.959885000 | 0.635320000  | 1.144970000  |
| C | 4.494147000  | 0.180320000  | -0.886542000 |
| C | 6.376879000  | 0.994843000  | 0.699374000  |
| C | 5.496424000  | 1.292853000  | -0.529183000 |
| C | 7.116424000  | -0.344860000 | 0.479640000  |
| C | 4.963371000  | -1.231536000 | -0.541959000 |
| C | 6.180033000  | -1.471277000 | 0.097897000  |
| C | 2.309647000  | 1.338360000  | -0.814752000 |
| C | 0.855981000  | 0.895442000  | -0.588413000 |
| C | 0.451764000  | 0.975863000  | 0.895184000  |
| C | 0.751725000  | 2.384775000  | 1.446392000  |
| C | 2.220691000  | 2.774778000  | 1.140555000  |
| C | 4.125223000  | -2.321905000 | -0.930570000 |
| C | 7.426542000  | 2.125068000  | 0.839268000  |
| C | 6.580859000  | -2.816098000 | 0.357071000  |
| C | 4.499400000  | -3.645983000 | -0.658215000 |
| C | 3.575686000  | -4.792136000 | -0.911922000 |
| O | 2.349089000  | -4.649002000 | -0.923772000 |
| C | 4.190384000  | -6.139647000 | -1.062898000 |
| C | 3.515467000  | -7.215357000 | -1.713946000 |
| O | 2.368745000  | -6.943640000 | -2.366153000 |
| C | 1.690941000  | -7.973400000 | -3.093066000 |
| H | 2.338755000  | -8.417699000 | -3.873170000 |
| H | 1.330476000  | -8.773160000 | -2.418438000 |
| H | 0.827531000  | -7.487113000 | -3.575008000 |
| C | 4.085953000  | -8.506355000 | -1.681136000 |
| H | 3.584148000  | -9.345440000 | -2.170307000 |
| C | 5.760298000  | -3.896133000 | -0.042011000 |
| C | 6.214388000  | -5.277269000 | 0.181105000  |
| O | 7.255759000  | -5.521408000 | 0.817870000  |
| C | 5.441269000  | -6.389931000 | -0.443356000 |
| C | 5.981828000  | -7.682050000 | -0.403117000 |
| H | 6.934108000  | -7.851368000 | 0.107879000  |
| C | 5.294822000  | -8.732457000 | -1.018041000 |
| H | 5.709668000  | -9.747229000 | -0.992576000 |
| C | 2.544162000  | 4.221590000  | 1.498998000  |
| C | 7.570896000  | 2.820721000  | 2.187487000  |
| H | 4.347770000  | 0.222549000  | -1.987469000 |
| H | 6.172734000  | 1.433621000  | -1.390305000 |
| H | 4.951355000  | 2.241866000  | -0.398510000 |
| H | 7.690475000  | -0.617785000 | 1.382522000  |
| H | 7.868567000  | -0.207530000 | -0.322432000 |
| H | 2.518970000  | 1.448451000  | -1.898177000 |
| H | 0.698803000  | -0.129797000 | -0.971408000 |
| H | 0.211681000  | 1.567979000  | -1.184450000 |
| H | 1.075385000  | 0.256304000  | 1.456225000  |
| H | 0.631041000  | 2.362719000  | 2.550182000  |
| H | 2.870630000  | 2.101560000  | 1.736452000  |
| H | 5.983129000  | 0.380716000  | 2.542513000  |
| H | 3.605380000  | 4.446076000  | 1.288744000  |
| H | 1.918206000  | 4.915710000  | 0.911116000  |
| H | 2.357436000  | 4.403936000  | 2.573373000  |
| H | -1.195271000 | -0.257897000 | 0.698565000  |

|    |              |               |              |
|----|--------------|---------------|--------------|
| H  | -1.560582000 | 1.345816000   | 0.712228000  |
| H  | 7.741784000  | 2.042896000   | 2.964486000  |
| H  | 6.586514000  | 3.279372000   | 2.435423000  |
| H  | -0.378008000 | 3.995684000   | 1.515000000  |
| H  | 2.604127000  | -1.243793000  | -1.268155000 |
| H  | 7.868188000  | -3.992582000  | 1.096321000  |
| H  | 8.941181000  | 3.820003000   | 1.267632000  |
| Si | -0.179909000 | -0.974474000  | 4.153241000  |
| O  | -0.666387000 | -1.870135000  | 5.473647000  |
| Si | 0.030657000  | -3.215934000  | 6.151703000  |
| O  | 1.676315000  | -3.078239000  | 6.026782000  |
| Si | 2.956353000  | -2.192920000  | 6.601553000  |
| O  | 4.043649000  | -1.930062000  | 5.378175000  |
| Si | 3.692861000  | -6.129078000  | 6.053719000  |
| Si | 4.489276000  | -1.821682000  | 3.801189000  |
| Si | 3.326162000  | -4.572228000  | 3.219056000  |
| O  | 4.370676000  | -3.299429000  | 3.072414000  |
| O  | 3.481837000  | -5.187997000  | 4.731968000  |
| O  | 3.888720000  | -7.706525000  | 5.623920000  |
| Si | 3.481157000  | -8.575795000  | 4.264277000  |
| O  | 1.951735000  | -8.073647000  | 3.858692000  |
| Si | 0.702762000  | -7.703223000  | 2.861001000  |
| O  | 1.784455000  | -4.072552000  | 2.982816000  |
| Si | 0.674696000  | -3.275588000  | 2.038702000  |
| O  | 0.063747000  | -2.008117000  | 2.888434000  |
| O  | -0.441735000 | -4.567154000  | 5.346006000  |
| Si | -0.826078000 | -6.158491000  | 5.129725000  |
| O  | -0.303160000 | -6.606264000  | 3.604439000  |
| O  | 3.539406000  | -10.149732000 | 4.744606000  |
| H  | 3.445324000  | -10.824201000 | 4.050196000  |
| O  | -0.118557000 | -9.048492000  | 2.375753000  |
| H  | -0.649240000 | -9.518046000  | 3.041995000  |
| O  | 1.320303000  | -2.622703000  | 0.676990000  |
| H  | 1.641916000  | -3.249708000  | -0.015179000 |
| O  | 3.756820000  | -5.726831000  | 2.103031000  |
| H  | 2.977822000  | -6.183548000  | 1.696051000  |
| O  | 3.481278000  | -0.694704000  | 3.100726000  |
| H  | 3.776472000  | -0.262083000  | 2.271971000  |
| O  | 6.037426000  | -1.249802000  | 3.627323000  |
| H  | 6.768270000  | -1.891735000  | 3.670099000  |
| O  | -0.460648000 | -3.392121000  | 7.721039000  |
| H  | -0.333411000 | -2.637002000  | 8.320257000  |
| O  | 3.712764000  | -3.007040000  | 7.825251000  |
| H  | 4.393165000  | -3.663910000  | 7.570465000  |
| O  | 1.233598000  | -0.197359000  | 4.582889000  |
| H  | 2.010934000  | -0.264863000  | 3.977940000  |
| O  | -1.358132000 | 0.102427000   | 3.787547000  |
| H  | -1.303106000 | 0.393546000   | 2.810504000  |
| O  | -0.506219000 | -4.367560000  | 1.623549000  |
| H  | -0.674586000 | -5.073131000  | 2.278395000  |
| O  | 2.399141000  | -0.778632000  | 7.248721000  |
| H  | 1.906638000  | -0.252341000  | 6.583597000  |
| O  | -2.462944000 | -6.390799000  | 5.071685000  |
| H  | -2.962625000 | -6.147286000  | 5.869571000  |
| O  | -0.162967000 | -7.115300000  | 6.293185000  |
| H  | 0.731996000  | -6.864573000  | 6.619604000  |
| O  | 2.347091000  | -6.103993000  | 7.045645000  |
| H  | 2.238275000  | -5.313338000  | 7.605278000  |
| O  | 5.026810000  | -5.491300000  | 6.816551000  |
| H  | 5.372701000  | -5.984099000  | 7.582872000  |
| O  | 1.389038000  | -7.002903000  | 1.505386000  |
| H  | 0.804836000  | -6.617719000  | 0.827627000  |
| O  | 4.559412000  | -8.337178000  | 3.036785000  |
| H  | 4.551212000  | -7.444285000  | 2.629874000  |

## SiO<sub>2</sub>-Dox complex 2

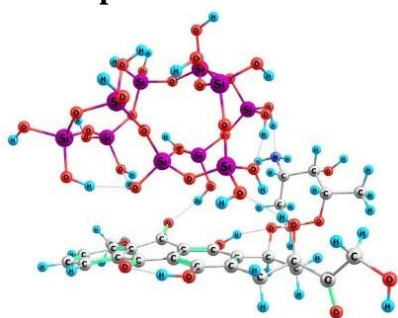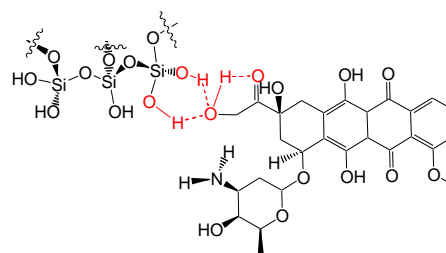

$E = -7011.288183504$

|   |              |              |              |
|---|--------------|--------------|--------------|
| O | 7.581288000  | 7.539678000  | -2.637718000 |
| O | 8.019317000  | 7.905307000  | -4.926177000 |
| O | 7.685969000  | 4.737100000  | -2.147520000 |
| O | 10.883445000 | 8.357603000  | -5.792393000 |
| O | 5.933253000  | 9.833350000  | -1.383412000 |
| O | 5.255335000  | 5.522405000  | 1.966413000  |
| O | 4.572942000  | 3.265003000  | -2.933634000 |
| O | 5.960144000  | 1.062723000  | -2.913450000 |
| O | 5.575559000  | 11.387369000 | 0.576839000  |
| O | 4.896154000  | 7.160948000  | 3.916070000  |
| O | 5.571744000  | 13.005605000 | 2.637456000  |
| N | 11.810044000 | 8.658643000  | -3.247283000 |
| C | 6.154371000  | 7.318043000  | -2.503660000 |
| C | 6.259428000  | 4.801305000  | -2.137958000 |
| C | 5.738358000  | 5.939876000  | -3.034619000 |
| C | 5.705886000  | 4.976581000  | -0.692743000 |
| C | 5.840974000  | 7.496792000  | -1.028267000 |
| C | 5.682024000  | 6.402120000  | -0.188520000 |
| C | 8.006034000  | 8.473888000  | -3.634955000 |
| C | 9.375951000  | 9.032075000  | -3.241762000 |
| C | 10.502585000 | 8.001954000  | -3.412185000 |
| C | 10.445110000 | 7.394141000  | -4.841280000 |
| C | 9.025093000  | 6.892647000  | -5.166016000 |
| C | 5.771216000  | 8.828953000  | -0.513009000 |
| C | 5.737620000  | 3.439091000  | -2.617481000 |
| C | 5.424465000  | 6.611458000  | 1.203315000  |
| C | 5.532235000  | 9.047812000  | 0.860428000  |
| C | 5.357750000  | 7.922214000  | 1.723547000  |
| C | 8.863126000  | 6.431603000  | -6.612232000 |
| C | 6.686613000  | 2.246950000  | -2.598607000 |
| C | 5.475701000  | 10.431604000 | 1.373192000  |
| C | 5.103949000  | 8.123388000  | 3.150530000  |
| C | 5.314466000  | 10.639101000 | 2.834570000  |
| C | 5.122088000  | 9.515188000  | 3.688377000  |
| C | 5.360403000  | 11.940790000 | 3.430129000  |
| C | 4.962863000  | 9.671385000  | 5.071415000  |
| C | 5.193771000  | 12.071569000 | 4.827200000  |
| C | 4.998010000  | 10.950180000 | 5.632225000  |
| C | 5.712600000  | 14.312398000 | 3.207924000  |
| H | 5.615758000  | 8.088758000  | -3.083771000 |
| H | 4.634703000  | 5.892809000  | -3.066826000 |
| H | 6.104197000  | 5.817048000  | -4.069386000 |
| H | 6.298446000  | 4.343735000  | -0.007803000 |
| H | 4.669101000  | 4.587216000  | -0.645898000 |
| H | 7.264923000  | 9.293662000  | -3.684427000 |
| H | 9.578683000  | 9.898580000  | -3.898402000 |
| H | 9.332645000  | 9.407666000  | -2.202511000 |
| H | 10.343468000 | 7.173846000  | -2.687359000 |
| H | 11.108828000 | 6.496843000  | -4.869693000 |
| H | 8.831672000  | 6.033598000  | -4.489533000 |
| H | 8.030640000  | 5.651391000  | -2.181949000 |
| H | 7.843361000  | 6.042667000  | -6.786028000 |
| H | 9.580792000  | 5.622400000  | -6.836592000 |
| H | 9.051753000  | 7.266453000  | -7.309798000 |
| H | 12.532524000 | 7.959422000  | -3.044633000 |
| H | 11.798518000 | 9.291792000  | -2.441686000 |
| H | 7.160416000  | 2.173950000  | -1.598819000 |
| H | 7.499873000  | 2.415222000  | -3.330873000 |
| H | 11.551451000 | 8.882186000  | -5.297117000 |
| H | 5.825584000  | 10.681011000 | -0.853751000 |
| H | 5.221658000  | 13.058352000 | 5.296127000  |

|    |              |              |              |
|----|--------------|--------------|--------------|
| H  | 4.871194000  | 11.081969000 | 6.713289000  |
| H  | 4.779050000  | 14.644172000 | 3.701736000  |
| H  | 5.938251000  | 14.987476000 | 2.367334000  |
| H  | 6.545059000  | 14.351925000 | 3.936169000  |
| Si | 4.077335000  | -7.760528000 | -3.126491000 |
| O  | 4.659275000  | -6.499522000 | -2.210214000 |
| Si | 3.998668000  | -5.119976000 | -1.583739000 |
| O  | 2.373441000  | -5.110169000 | -1.865699000 |
| Si | 0.910957000  | -5.757681000 | -1.441066000 |
| O  | 0.117589000  | -6.165483000 | -2.819271000 |
| Si | 0.181390000  | -2.505249000 | -4.042561000 |
| Si | -0.305165000 | -7.007019000 | -4.163839000 |
| Si | 1.040106000  | -4.836114000 | -5.964147000 |
| O  | 0.077041000  | -6.090648000 | -5.487334000 |
| O  | 1.089188000  | -3.652309000 | -4.824777000 |
| O  | 0.557265000  | -1.038492000 | -4.704295000 |
| Si | 1.217893000  | -0.570712000 | -6.162499000 |
| O  | 2.828296000  | -0.931450000 | -6.197514000 |
| Si | 4.294492000  | -1.161342000 | -5.473385000 |
| O  | 2.560759000  | -5.378183000 | -6.274051000 |
| Si | 3.989246000  | -6.032001000 | -5.777506000 |
| O  | 3.701321000  | -7.185533000 | -4.628911000 |
| O  | 4.658457000  | -3.850409000 | -2.438102000 |
| Si | 4.401748000  | -2.188076000 | -2.390597000 |
| O  | 4.038203000  | -1.684227000 | -3.917878000 |
| O  | 0.937830000  | 1.057721000  | -6.233636000 |
| H  | 1.383867000  | 1.542325000  | -6.948319000 |
| O  | 5.113203000  | 0.275648000  | -5.514010000 |
| H  | 5.653688000  | 0.500877000  | -4.727619000 |
| O  | 4.660511000  | -6.686094000 | -7.132499000 |
| H  | 5.559762000  | -7.042803000 | -7.034625000 |
| O  | 0.403908000  | -4.134173000 | -7.332415000 |
| H  | 0.385868000  | -4.657890000 | -8.153242000 |
| O  | 0.553350000  | -8.437779000 | -4.142432000 |
| H  | 0.555898000  | -8.977197000 | -4.953119000 |
| O  | -1.908187000 | -7.392352000 | -4.161813000 |
| H  | -2.546633000 | -6.663448000 | -4.247236000 |
| O  | 4.389379000  | -5.097974000 | 0.018648000  |
| H  | 4.078559000  | -4.350309000 | 0.557184000  |
| O  | -0.038261000 | -4.568387000 | -0.759738000 |
| H  | 0.129192000  | -4.332508000 | 0.170110000  |
| O  | 2.705360000  | -8.354000000 | -2.397542000 |
| H  | 1.968163000  | -8.581789000 | -3.018111000 |
| O  | 5.246217000  | -8.909498000 | -3.321949000 |
| H  | 5.474379000  | -9.441171000 | -2.540023000 |
| O  | 4.987439000  | -4.829254000 | -5.202435000 |
| H  | 4.955643000  | -4.557016000 | -4.259771000 |
| O  | 1.087054000  | -7.009229000 | -0.382954000 |
| H  | 1.674602000  | -7.713071000 | -0.731771000 |
| O  | 5.787873000  | -1.520990000 | -1.803152000 |
| H  | 5.967334000  | -0.589974000 | -2.066718000 |
| O  | 3.167948000  | -1.867283000 | -1.339715000 |
| H  | 2.254386000  | -2.005413000 | -1.684925000 |
| O  | 0.577030000  | -2.382409000 | -2.433568000 |
| H  | 0.197447000  | -3.059430000 | -1.823494000 |
| O  | -1.394489000 | -2.963471000 | -4.267161000 |
| H  | -2.076770000 | -2.428545000 | -3.826102000 |
| O  | 5.152861000  | -2.251637000 | -6.368209000 |
| H  | 5.113434000  | -3.191906000 | -6.083269000 |
| O  | 0.460907000  | -1.302260000 | -7.434453000 |
| H  | 0.472887000  | -2.283116000 | -7.499914000 |
| H  | 5.070934000  | 5.844781000  | 2.894673000  |
| H  | 4.814823000  | 8.786330000  | 5.696298000  |
| H  | 5.012639000  | 1.335242000  | -2.911332000 |

## SiO<sub>2</sub>-Dox complex 3

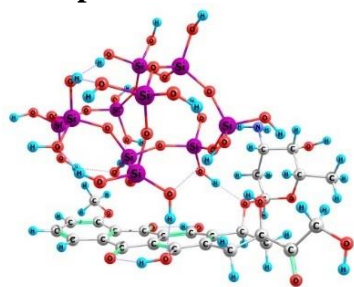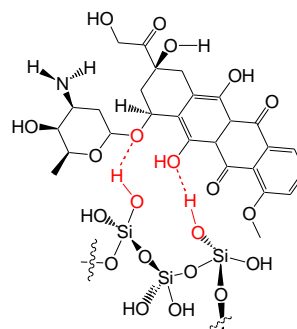

$E = -7011.290569604$

|    |              |              |              |   |              |              |              |
|----|--------------|--------------|--------------|---|--------------|--------------|--------------|
| Si | -2.946915000 | -1.502328000 | 1.711560000  | O | -7.261064000 | 1.379892000  | 6.049133000  |
| O  | -2.010616000 | -0.618110000 | 0.673562000  | O | -2.862152000 | -1.384951000 | 7.857407000  |
| Si | -0.936003000 | 0.530602000  | 0.177835000  | O | -5.926710000 | -5.506602000 | 6.539718000  |
| O  | 0.463825000  | 0.337923000  | 1.045260000  | O | -5.279483000 | -7.165601000 | 4.549551000  |
| Si | 0.867329000  | -0.452706000 | 2.441190000  | O | -6.247242000 | 3.523533000  | 7.016803000  |
| O  | -0.288583000 | -0.088051000 | 3.565893000  | O | -1.963375000 | 0.772161000  | 8.840648000  |
| Si | 0.990808000  | 3.437368000  | 4.024022000  | O | -4.900804000 | 5.782714000  | 7.300598000  |
| Si | -0.628897000 | -0.087636000 | 5.187047000  | N | -7.559524000 | 0.596867000  | -0.103036000 |
| Si | -1.955563000 | 2.467763000  | 4.419572000  | C | -7.147180000 | -1.341013000 | 5.431421000  |
| O  | -1.612505000 | 1.226697000  | 5.465124000  | C | -5.609743000 | -3.415436000 | 5.358465000  |
| O  | -0.541455000 | 2.926398000  | 3.682133000  | C | -7.048577000 | -2.877574000 | 5.514130000  |
| O  | 1.004142000  | 5.076390000  | 4.168128000  | C | -4.743614000 | -2.828024000 | 6.481918000  |
| Si | -0.150012000 | 6.278942000  | 4.242858000  | C | -6.022854000 | -0.634497000 | 6.187059000  |
| O  | -1.110443000 | 6.143884000  | 2.909698000  | C | -4.912269000 | -1.336470000 | 6.659346000  |
| Si | -2.499409000 | 5.784533000  | 2.117401000  | C | -8.420599000 | -0.939172000 | 3.365642000  |
| O  | -3.013366000 | 1.997093000  | 3.275195000  | C | -8.432832000 | 0.084754000  | 2.220813000  |
| Si | -4.247130000 | 1.138777000  | 2.600930000  | C | -7.514698000 | -0.315445000 | 1.041189000  |
| O  | -3.827271000 | -0.473000000 | 2.652092000  | C | -7.810937000 | -1.759920000 | 0.597266000  |
| O  | -1.587132000 | 2.036282000  | 0.423006000  | C | -7.771464000 | -2.700143000 | 1.825591000  |
| Si | -1.182837000 | 3.643378000  | 0.171750000  | C | -6.143193000 | 0.767856000  | 6.455313000  |
| O  | -2.239259000 | 4.562685000  | 1.044213000  | C | -5.627788000 | -4.955303000 | 5.493966000  |
| O  | 0.588258000  | 7.746451000  | 4.125928000  | C | -3.908145000 | -0.652259000 | 7.398403000  |
| H  | 1.281905000  | 7.942621000  | 4.778594000  | C | -5.108209000 | 1.461831000  | 7.131283000  |
| O  | -3.042868000 | 7.140413000  | 1.348005000  | C | -3.985334000 | 0.732913000  | 7.612443000  |
| H  | -3.424663000 | 7.023667000  | 0.461429000  | C | -8.162099000 | -4.139352000 | 1.503249000  |
| O  | -5.637516000 | 1.384925000  | 3.432680000  | C | -5.255155000 | -5.787855000 | 4.273765000  |
| H  | -6.163051000 | 0.591078000  | 3.697165000  | C | -5.201755000 | 2.925161000  | 7.332544000  |
| O  | -2.563864000 | 3.767073000  | 5.251087000  | C | -2.903444000 | 1.416123000  | 8.333950000  |
| H  | -3.129223000 | 4.334796000  | 4.666155000  | C | -4.026163000 | 3.640846000  | 7.899217000  |
| O  | -1.413057000 | -1.530709000 | 5.417270000  | C | -2.928096000 | 2.898899000  | 8.413862000  |
| H  | -1.800204000 | -1.709006000 | 6.303106000  | C | -3.921917000 | 5.066641000  | 7.886144000  |
| O  | 0.742050000  | -0.003632000 | 6.099727000  | C | -1.801024000 | 3.533670000  | 8.955434000  |
| H  | 1.138392000  | 0.896252000  | 6.098124000  | C | -2.782901000 | 5.687143000  | 8.447412000  |
| O  | -0.628849000 | 0.451987000  | -1.439986000 | C | -1.740213000 | 4.928464000  | 8.979722000  |
| H  | -0.178233000 | -0.342574000 | -1.774983000 | C | -4.686557000 | 7.165775000  | 6.994164000  |
| O  | 2.346240000  | 0.200693000  | 2.834138000  | H | -8.104280000 | -1.046710000 | 5.910341000  |
| H  | 2.835956000  | -0.186868000 | 3.581062000  | H | -7.414146000 | -3.192949000 | 6.508423000  |
| O  | -2.050016000 | -2.506206000 | 2.701287000  | H | -7.724200000 | -3.323057000 | 4.768537000  |
| H  | -1.869020000 | -2.209494000 | 3.621529000  | H | -3.683082000 | -3.080021000 | 6.297429000  |
| O  | -3.887477000 | -2.448799000 | 0.726170000  | H | -4.999480000 | -3.332194000 | 7.434303000  |
| H  | -4.383719000 | -3.162652000 | 1.160236000  | H | -9.247241000 | -0.741274000 | 4.077742000  |
| O  | -4.453738000 | 1.658450000  | 1.040417000  | H | -8.155192000 | 1.082163000  | 2.606234000  |
| H  | -3.615108000 | 1.876149000  | 0.588493000  | H | -9.474993000 | 0.149698000  | 1.854036000  |
| O  | 0.987875000  | -2.089741000 | 2.254900000  | H | -6.469541000 | -0.331846000 | 1.398938000  |
| H  | 0.137999000  | -2.572416000 | 2.293006000  | H | -6.995886000 | -2.074134000 | -0.090365000 |
| O  | -1.481036000 | 4.074203000  | -1.401066000 | H | -6.733394000 | -2.684942000 | 2.215220000  |
| H  | -0.992074000 | 3.583373000  | -2.083788000 | H | -4.143015000 | -3.037976000 | 4.100187000  |
| O  | 0.395139000  | 3.939847000  | 0.530108000  | H | -8.090896000 | -4.775623000 | 2.403221000  |
| H  | 0.898000000  | 3.479775000  | 1.235449000  | H | -9.199317000 | -4.195685000 | 1.124164000  |
| O  | 1.989629000  | 3.052710000  | 2.754026000  | H | -7.487341000 | -4.556954000 | 0.733942000  |
| H  | 2.296677000  | 2.115597000  | 2.718691000  | H | -7.207715000 | 1.516277000  | 0.180770000  |
| O  | 1.434103000  | 2.689513000  | 5.446418000  | H | -8.531103000 | 0.734804000  | -0.398805000 |
| H  | 2.254978000  | 3.005596000  | 5.866034000  | H | -4.249651000 | -5.466623000 | 3.923512000  |
| O  | -3.599607000 | 5.312357000  | 3.292441000  | H | -5.954414000 | -5.510553000 | 3.452717000  |
| H  | -4.535416000 | 5.275569000  | 3.024908000  | H | -9.129851000 | -2.605920000 | -0.592032000 |
| O  | -1.012793000 | 6.183234000  | 5.652421000  | H | -7.174983000 | 2.339674000  | 6.322135000  |
| H  | -1.503779000 | 5.348290000  | 5.807694000  | H | -2.292181000 | -0.755604000 | 8.399280000  |
| O  | -7.175639000 | -0.837132000 | 4.073513000  | H | -0.976507000 | 2.925270000  | 9.336996000  |
| O  | -8.659250000 | -2.245590000 | 2.877806000  | H | -5.624379000 | -7.260671000 | 5.460498000  |
| O  | -5.114820000 | -3.042744000 | 4.074492000  | H | -2.698333000 | 6.776932000  | 8.458498000  |
| O  | -9.065437000 | -1.779855000 | -0.085794000 | H | -0.866286000 | 5.438756000  | 9.401640000  |
|    |              |              |              | H | -4.652302000 | 7.790215000  | 7.906977000  |
|    |              |              |              | H | -5.543891000 | 7.477847000  | 6.376760000  |
|    |              |              |              | H | -3.752623000 | 7.305077000  | 6.416904000  |

## SiO<sub>2</sub>-APS-Dox complex 1

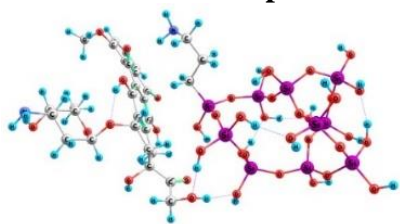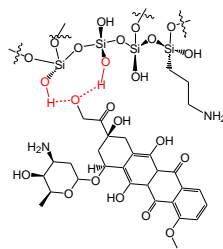

$E = -7109.1114435578$

|    |              |              |              |
|----|--------------|--------------|--------------|
| Si | -2.606782000 | -1.106705000 | 6.719059000  |
| O  | -1.363480000 | -1.983779000 | 7.367046000  |
| Si | -0.838965000 | -2.516270000 | 8.841372000  |
| O  | -1.753077000 | -1.792162000 | 10.013325000 |
| Si | -3.205054000 | -2.067784000 | 10.747267000 |
| O  | -4.051221000 | -0.672309000 | 10.955118000 |
| Si | -0.510817000 | 0.170451000  | 13.183381000 |
| Si | -4.536683000 | 0.865347000  | 10.625722000 |
| Si | -1.706092000 | 1.888772000  | 10.731874000 |
| O  | -3.339045000 | 1.934662000  | 11.045292000 |
| O  | -0.962906000 | 0.844634000  | 11.751307000 |
| O  | 0.980506000  | 0.688403000  | 13.628631000 |
| Si | 2.437618000  | 1.358068000  | 13.175159000 |
| C  | 2.731522000  | 2.875958000  | 14.215222000 |
| H  | 2.996922000  | 2.605616000  | 15.255036000 |
| H  | 3.605515000  | 3.416022000  | 13.799929000 |
| C  | 1.479762000  | 3.792577000  | 14.184531000 |
| H  | 1.074685000  | 3.853210000  | 13.154203000 |
| H  | 0.682028000  | 3.335433000  | 14.801998000 |
| C  | 1.728195000  | 5.228838000  | 14.666148000 |
| H  | 0.782544000  | 5.796221000  | 14.556878000 |
| O  | 2.332297000  | 1.863078000  | 11.598354000 |
| Si | 2.403034000  | 1.749591000  | 9.964474000  |
| O  | -1.496270000 | 1.315883000  | 9.191347000  |
| Si | -1.695558000 | 1.774091000  | 7.621743000  |
| O  | -2.214233000 | 0.500121000  | 6.726957000  |
| O  | 0.728925000  | -2.102413000 | 9.045156000  |
| Si | 1.997783000  | -1.383707000 | 9.807794000  |
| O  | 1.973521000  | -0.262470000 | 9.463882000  |
| O  | 3.630653000  | 0.207664000  | 13.317255000 |
| H  | 3.468982000  | -0.606397000 | 12.800255000 |
| O  | 3.917123000  | 2.119634000  | 9.412717000  |
| H  | 4.525519000  | 1.374695000  | 9.184302000  |
| O  | -1.152255000 | 3.438497000  | 10.873050000 |
| H  | -0.240008000 | 3.531547000  | 10.516005000 |
| O  | -4.853423000 | 0.925017000  | 8.984827000  |
| H  | -4.732123000 | 1.781962000  | 8.531160000  |
| O  | -5.936032000 | 1.209337000  | 11.421110000 |
| H  | -5.915556000 | 1.174937000  | 12.392986000 |
| O  | -0.884608000 | -4.168054000 | 8.926488000  |
| H  | -1.742954000 | -4.597024000 | 8.768550000  |
| O  | -2.788826000 | -2.672007000 | 12.242305000 |
| H  | -3.486852000 | -2.721916000 | 12.919562000 |
| O  | -4.004807000 | -1.352524000 | 7.590976000  |
| H  | -4.424910000 | -0.545035000 | 7.976540000  |
| O  | -2.742858000 | -1.650937000 | 5.167464000  |
| H  | -3.463718000 | -1.274047000 | 4.634659000  |
| O  | -0.184982000 | 2.290463000  | 7.144675000  |
| H  | -0.075617000 | 2.627010000  | 6.237654000  |
| O  | -4.087544000 | -3.177675000 | 9.893633000  |
| H  | -4.334774000 | -2.851070000 | 9.002237000  |
| O  | 3.407328000  | -1.961373000 | 9.126267000  |
| H  | 3.697280000  | -2.847384000 | 9.407728000  |
| O  | 2.020606000  | -1.694553000 | 11.434997000 |
| H  | 1.175682000  | -1.768171000 | 11.942307000 |
| O  | -0.338803000 | -1.481450000 | 13.012354000 |
| H  | -1.154916000 | -1.996865000 | 12.804749000 |
| O  | -1.661391000 | 0.624444000  | 14.283886000 |
| H  | -1.542214000 | 0.297151000  | 15.192104000 |
| O  | 1.312976000  | 2.883976000  | 9.428223000  |
| H  | 0.939031000  | 2.752009000  | 8.524321000  |
| O  | 7.686652000  | 3.808289000  | 12.851336000 |
| O  | 9.396278000  | 3.041173000  | 14.318467000 |
| O  | 8.537605000  | 0.426217000  | 11.783674000 |
| O  | 11.789808000 | 4.822189000  | 14.767528000 |
| O  | 6.071016000  | 4.549080000  | 15.053555000 |
| H  | 2.455453000  | 5.713306000  | 13.970913000 |

|   |              |              |              |
|---|--------------|--------------|--------------|
| O | 6.264074000  | -0.865349000 | 16.187682000 |
| O | 5.677086000  | -1.444752000 | 11.393206000 |
| O | 5.569731000  | -0.104142000 | 8.848852000  |
| O | 5.175792000  | 4.885070000  | 17.545291000 |
| O | 5.280623000  | -0.252905000 | 18.580283000 |
| O | 6.373211000  | 5.507066000  | 20.130191000 |
| N | 10.827717000 | 6.866609000  | 13.039446000 |
| C | 6.608080000  | 2.843548000  | 12.923284000 |
| C | 7.141320000  | 0.381146000  | 12.099211000 |
| C | 6.548724000  | 1.780811000  | 11.813029000 |
| C | 6.867950000  | -0.104428000 | 13.543340000 |
| C | 6.431763000  | 2.290031000  | 14.324200000 |
| C | 6.519659000  | 0.928925000  | 14.594974000 |
| C | 9.059663000  | 3.400103000  | 12.993906000 |
| C | 9.926081000  | 4.557879000  | 12.475537000 |
| C | 9.981960000  | 5.746749000  | 13.464032000 |
| C | 10.421869000 | 5.236174000  | 14.849669000 |
| C | 9.471563000  | 4.101954000  | 15.297808000 |
| C | 6.117131000  | 3.223828000  | 15.350372000 |
| C | 6.464368000  | -0.576477000 | 11.071152000 |
| C | 6.226256000  | 0.460782000  | 15.911489000 |
| C | 5.871378000  | 2.777350000  | 16.660355000 |
| C | 5.906786000  | 1.373661000  | 16.938817000 |
| C | 9.836704000  | 3.451968000  | 16.628572000 |
| C | 6.771247000  | -0.351541000 | 9.577230000  |
| C | 5.615995000  | 3.756698000  | 17.756039000 |
| C | 5.596442000  | 0.903570000  | 18.318982000 |
| C | 5.884302000  | 3.292309000  | 19.150693000 |
| C | 5.724569000  | 1.909463000  | 19.428543000 |
| C | 6.093303000  | 4.184414000  | 20.238205000 |
| C | 5.674775000  | 1.438941000  | 20.746845000 |
| C | 6.020102000  | 3.693291000  | 21.557942000 |
| C | 5.799235000  | 2.339577000  | 21.810510000 |
| C | 7.292167000  | 6.004784000  | 19.146844000 |
| H | 5.736271000  | 3.495837000  | 12.723589000 |
| H | 5.475554000  | 1.654273000  | 11.586899000 |
| H | 7.004769000  | 2.198456000  | 10.898889000 |
| H | 7.760454000  | -0.673106000 | 13.879230000 |
| H | 6.040210000  | -0.835579000 | 13.498299000 |
| H | 9.221467000  | 2.481134000  | 12.404525000 |
| H | 9.543227000  | 4.891681000  | 11.493284000 |
| H | 10.950012000 | 4.168598000  | 12.318409000 |
| H | 8.953924000  | 6.141940000  | 13.590593000 |
| H | 10.313892000 | 6.071131000  | 15.575027000 |
| H | 8.475748000  | 4.572613000  | 15.411018000 |
| H | 8.960909000  | -0.401503000 | 12.073832000 |
| H | 9.096748000  | 2.673961000  | 16.886221000 |
| H | 10.836257000 | 2.981661000  | 16.586822000 |
| H | 9.836125000  | 4.207673000  | 17.435819000 |
| H | 10.541196000 | 7.179594000  | 12.105982000 |
| H | 11.792243000 | 6.532141000  | 12.935559000 |
| H | 7.292069000  | -1.259540000 | 9.203865000  |
| H | 7.446233000  | 0.502822000  | 9.415162000  |
| H | 12.191942000 | 4.902423000  | 15.647516000 |
| H | 6.590917000  | 4.712054000  | 14.238394000 |
| H | 6.557750000  | -1.367112000 | 15.407797000 |
| H | 5.531903000  | 0.368979000  | 20.926329000 |
| H | 4.948082000  | -0.863721000 | 8.950584000  |
| H | 6.170423000  | 4.403952000  | 22.378760000 |
| H | 5.754343000  | 1.977408000  | 22.844798000 |
| H | 7.930580000  | 5.195102000  | 18.746033000 |
| H | 7.933954000  | 6.746563000  | 19.654420000 |
| H | 6.754387000  | 6.484371000  | 18.312112000 |
| O | -2.879490000 | 2.922318000  | 7.429094000  |
| H | -2.683839000 | 3.827910000  | 7.726358000  |
| N | 2.137301000  | 5.285247000  | 16.077150000 |
| H | 2.082534000  | 6.255113000  | 16.404887000 |
| H | 3.129804000  | 5.039306000  | 16.170609000 |



## SiO<sub>2</sub>-APS-Dox complex 2

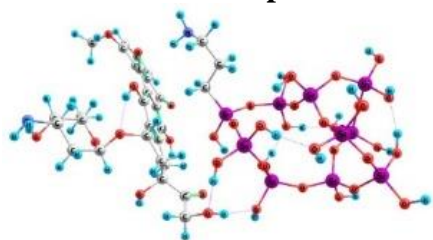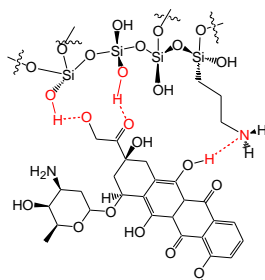

$E = -7109.113112645$

|    |              |              |              |   |              |              |              |
|----|--------------|--------------|--------------|---|--------------|--------------|--------------|
| Si | -1.909516000 | -2.976674000 | 7.788411000  | O | 12.454354000 | 3.413075000  | 15.313894000 |
| O  | -0.831163000 | -3.409119000 | 8.969009000  | O | 5.812171000  | 4.765594000  | 15.396568000 |
| Si | -0.360919000 | -2.957779000 | 10.483147000 | O | 6.944653000  | -0.593657000 | 14.656874000 |
| O  | -1.625943000 | -2.198797000 | 11.232607000 | O | 5.364547000  | 0.749947000  | 11.100056000 |
| Si | -2.992764000 | -2.535869000 | 12.087138000 | O | 4.977185000  | 1.051482000  | 8.392422000  |
| O  | -4.298645000 | -1.800410000 | 11.392092000 | O | 3.868530000  | 3.876467000  | 17.110654000 |
| Si | -0.992512000 | 1.464018000  | 13.449593000 | O | 5.493337000  | -1.057220000 | 16.823323000 |
| Si | -4.873109000 | -0.477636000 | 10.580019000 | O | 3.910506000  | 3.864064000  | 19.942588000 |
| Si | -2.372194000 | 1.339738000  | 10.552485000 | N | 11.944682000 | 6.196762000  | 15.306893000 |
| O  | -3.917401000 | 0.838856000  | 10.880939000 | C | 7.181729000  | 4.012371000  | 12.945365000 |
| O  | -1.432168000 | 1.208211000  | 11.884618000 | C | 7.424155000  | 1.996149000  | 11.233583000 |
| O  | 0.281945000  | 2.489601000  | 13.579389000 | C | 7.053814000  | 3.488871000  | 11.499010000 |
| Si | 1.863463000  | 2.888550000  | 13.163016000 | C | 7.691892000  | 1.196262000  | 12.534457000 |
| C  | 2.360743000  | 4.558827000  | 13.857479000 | C | 6.654683000  | 3.004922000  | 13.955222000 |
| H  | 1.488404000  | 4.996844000  | 14.384138000 | C | 6.912744000  | 1.645698000  | 13.753701000 |
| H  | 3.120497000  | 4.378039000  | 14.642216000 | C | 9.700476000  | 3.924279000  | 13.100251000 |
| C  | 2.882655000  | 5.569778000  | 12.806781000 | C | 10.793366000 | 4.958869000  | 13.404561000 |
| H  | 3.648305000  | 5.102294000  | 12.155420000 | C | 10.915493000 | 5.224019000  | 14.924528000 |
| H  | 2.054097000  | 5.844953000  | 12.127443000 | C | 11.149289000 | 3.891540000  | 15.662415000 |
| C  | 3.472399000  | 6.860713000  | 13.406077000 | C | 10.033493000 | 2.884228000  | 15.297556000 |
| H  | 3.337093000  | 7.694453000  | 12.686891000 | C | 5.959445000  | 3.458537000  | 15.112528000 |
| H  | 2.910679000  | 7.142412000  | 14.316529000 | C | 6.232342000  | 1.347512000  | 10.486797000 |
| N  | 4.905461000  | 6.718633000  | 13.771525000 | C | 6.558990000  | 0.704305000  | 14.755719000 |
| H  | 5.474868000  | 6.846126000  | 12.925950000 | C | 5.509870000  | 2.502823000  | 16.050741000 |
| H  | 5.183554000  | 7.494723000  | 14.383475000 | C | 5.849116000  | 1.126087000  | 15.902376000 |
| O  | 1.905118000  | 2.962488000  | 11.495528000 | C | 10.276104000 | 1.477723000  | 15.845339000 |
| Si | 1.683062000  | 2.299902000  | 10.009237000 | C | 6.203186000  | 1.470825000  | 8.966582000  |
| O  | -1.749735000 | 0.328366000  | 9.397557000  | C | 4.638063000  | 2.926706000  | 17.189714000 |
| Si | -1.757482000 | 0.177572000  | 7.759159000  | C | 5.471768000  | 0.161271000  | 16.971157000 |
| O  | -1.595112000 | -1.401522000 | 7.333648000  | C | 4.719783000  | 2.099029000  | 18.436255000 |
| O  | 0.920418000  | -1.945814000 | 10.358808000 | C | 5.092209000  | 0.739645000  | 18.308767000 |
| Si | 1.920862000  | -0.764942000 | 10.920456000 | C | 4.346380000  | 2.587586000  | 19.716160000 |
| O  | 1.569591000  | 0.654221000  | 10.155736000 | C | 5.087286000  | -0.113681000 | 19.422438000 |
| O  | 2.898154000  | 1.737885000  | 13.757673000 | C | 4.384533000  | 1.727934000  | 20.827354000 |
| H  | 2.742747000  | 0.823190000  | 13.439434000 | C | 4.745227000  | 0.384675000  | 20.682480000 |
| O  | 2.874629000  | 2.725649000  | 8.955036000  | C | 4.876593000  | 4.922750000  | 19.905734000 |
| H  | 3.604861000  | 2.087784000  | 8.765924000  | H | 6.536075000  | 4.900035000  | 12.982031000 |
| O  | -2.487214000 | 2.901251000  | 10.023154000 | H | 5.996141000  | 3.662844000  | 11.223580000 |
| H  | -1.596892000 | 3.287004000  | 9.867425000  | H | 7.646394000  | 4.117184000  | 10.810742000 |
| O  | -4.880000000 | -0.878564000 | 8.958831000  | H | 8.766223000  | 1.300340000  | 12.765640000 |
| H  | -4.622126000 | -0.190169000 | 8.304676000  | H | 7.501050000  | 0.131494000  | 12.309531000 |
| O  | -6.431590000 | -0.164783000 | 11.017811000 | H | 9.757496000  | 3.569462000  | 12.051734000 |
| H  | -6.594409000 | 0.026068000  | 11.957832000 | H | 10.569810000 | 5.896881000  | 12.863372000 |
| O  | 0.152974000  | -4.281290000 | 11.330973000 | H | 11.753079000 | 4.566371000  | 13.017896000 |
| H  | -0.525028000 | -4.941406000 | 11.557881000 | H | 9.940658000  | 5.612102000  | 15.281053000 |
| O  | -2.654328000 | -1.959160000 | 13.612921000 | H | 11.091751000 | 4.083151000  | 16.755239000 |
| H  | -3.385284000 | -1.934606000 | 14.255837000 | H | 9.083517000  | 3.282027000  | 15.714760000 |
| O  | -3.478142000 | -3.166760000 | 8.259612000  | H | 8.942304000  | 1.094476000  | 10.337798000 |
| H  | -4.028830000 | -2.378314000 | 8.480391000  | H | 9.431836000  | 0.809644000  | 15.601415000 |
| O  | -1.540277000 | -4.033492000 | 6.573549000  | H | 11.193552000 | 1.046144000  | 15.406013000 |
| H  | -2.144521000 | -4.043673000 | 5.811703000  | H | 10.390834000 | 1.498079000  | 16.944749000 |
| O  | -0.502704000 | 1.127939000  | 7.228360000  | H | 11.807766000 | 7.063327000  | 14.775641000 |
| H  | -0.347925000 | 1.204215000  | 6.270280000  | H | 12.860441000 | 5.837344000  | 15.014585000 |
| O  | -3.264415000 | -4.167641000 | 12.166425000 | H | 7.063659000  | 0.898767000  | 8.562325000  |
| H  | -3.826917000 | -4.557735000 | 11.475648000 | H | 6.375282000  | 2.525004000  | 8.677516000  |
| O  | 3.456310000  | -1.246407000 | 10.540606000 | H | 12.750370000 | 2.794765000  | 16.001401000 |
| H  | 4.158295000  | -0.593740000 | 10.758616000 | H | 5.470489000  | 5.389570000  | 14.660472000 |
| O  | 1.821781000  | -0.618932000 | 12.576161000 | H | 7.483497000  | -0.726104000 | 13.858268000 |
| H  | 0.960068000  | -0.541414000 | 13.056182000 | H | 5.364951000  | -1.163776000 | 19.287349000 |
| O  | -0.477636000 | -0.010024000 | 14.055200000 | H | 4.816245000  | 0.111810000  | 8.597894000  |
| H  | -1.159115000 | -0.722605000 | 14.016162000 | H | 4.109805000  | 2.138339000  | 21.806100000 |
| O  | -2.325980000 | 2.073606000  | 14.213754000 | H | 4.763019000  | -0.272510000 | 21.559794000 |
| H  | -2.202559000 | 2.380309000  | 15.128577000 | H | 5.714688000  | 4.715940000  | 20.600023000 |
| O  | 0.275275000  | 2.953709000  | 9.385083000  | H | 4.352967000  | 5.836301000  | 20.235360000 |
| H  | 0.050638000  | 2.565762000  | 8.509419000  | H | 5.278881000  | 5.088471000  | 18.888666000 |
| O  | 8.457094000  | 4.568514000  | 13.334485000 | O | -3.237263000 | 0.661848000  | 7.149981000  |
|    |              |              |              | H | -3.391268000 | 1.619745000  | 7.063088000  |

## SiO<sub>2</sub>-2APS-Dox complex 1

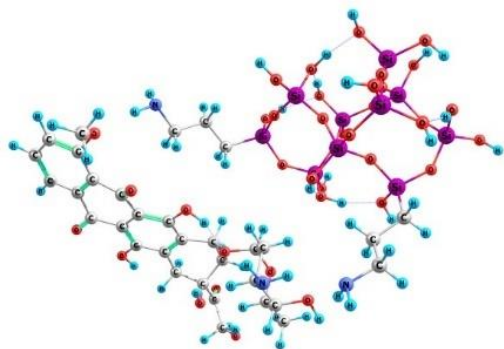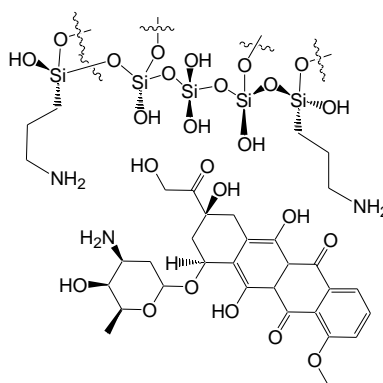

$E = -7206.966864318$

|    |              |              |              |
|----|--------------|--------------|--------------|
| Si | 2.459842000  | 1.814232000  | 4.308821000  |
| O  | 1.657450000  | 0.548213000  | 5.020998000  |
| Si | 0.426614000  | 0.344537000  | 6.107852000  |
| O  | 0.327631000  | 1.699363000  | 7.045591000  |
| Si | -0.553995000 | 3.089081000  | 7.026736000  |
| O  | 0.359770000  | 4.383453000  | 7.459230000  |
| Si | 0.702783000  | 1.886043000  | 10.796460000 |
| Si | 1.694359000  | 5.332650000  | 7.634763000  |
| Si | 3.100784000  | 3.075909000  | 9.044667000  |
| O  | 2.730349000  | 4.669951000  | 8.746172000  |
| O  | 1.767123000  | 2.348283000  | 9.641714000  |
| O  | 1.397912000  | 0.784647000  | 11.783079000 |
| Si | 2.188567000  | -0.548118000 | 12.386232000 |
| C  | 2.725241000  | -0.184960000 | 14.131070000 |
| H  | 3.108042000  | -1.109380000 | 14.609596000 |
| H  | 3.596167000  | 0.499077000  | 14.060953000 |
| C  | 1.615926000  | 0.469180000  | 14.980575000 |
| H  | 1.120635000  | 1.276371000  | 14.405974000 |
| H  | 0.825387000  | -0.277689000 | 15.202212000 |
| C  | 2.120132000  | 1.084266000  | 16.290972000 |
| H  | 2.624247000  | 0.293304000  | 16.897987000 |
| H  | 2.907629000  | 1.824890000  | 16.054588000 |
| N  | 1.034860000  | 1.777746000  | 16.996953000 |
| H  | 0.416632000  | 1.088224000  | 17.439481000 |
| H  | 1.431085000  | 2.329639000  | 17.764594000 |
| O  | 3.546965000  | -0.841104000 | 11.452639000 |
| Si | 3.975978000  | -0.937149000 | 9.863231000  |
| O  | 3.506643000  | 2.355130000  | 7.620311000  |
| Si | 4.691829000  | 2.134091000  | 6.483391000  |
| C  | 5.943156000  | 3.523676000  | 6.439797000  |
| H  | 6.583062000  | 3.379686000  | 5.544430000  |
| H  | 5.365355000  | 4.451348000  | 6.240707000  |
| C  | 6.818632000  | 3.702336000  | 7.702041000  |
| H  | 6.188084000  | 3.776724000  | 8.606940000  |
| H  | 7.456295000  | 2.807453000  | 7.852760000  |
| C  | 7.708309000  | 4.954025000  | 7.634043000  |
| H  | 8.396364000  | 4.860731000  | 6.760412000  |
| H  | 7.067145000  | 5.834196000  | 7.418636000  |
| N  | 8.408612000  | 5.186283000  | 8.905686000  |
| H  | 9.007133000  | 4.386300000  | 9.142417000  |
| H  | 9.035706000  | 5.993216000  | 8.825865000  |
| O  | 3.948596000  | 2.020209000  | 5.000659000  |
| O  | 0.720357000  | -0.968399000 | 7.048014000  |
| Si | 1.284846000  | -1.566414000 | 8.479282000  |
| O  | 2.628640000  | -0.712280000 | 8.916798000  |
| O  | 1.172888000  | -1.867344000 | 12.322145000 |
| H  | 0.672994000  | -1.954686000 | 11.481302000 |
| O  | 4.663197000  | -2.399069000 | 9.483323000  |
| H  | 4.035411000  | -3.061364000 | 9.137283000  |
| O  | 4.358165000  | 3.043816000  | 10.121057000 |
| H  | 4.758440000  | 2.147675000  | 10.188469000 |
| O  | 2.379105000  | 5.373471000  | 6.116179000  |
| H  | 3.106794000  | 5.997688000  | 5.949751000  |
| O  | 1.286952000  | 6.864255000  | 8.081026000  |

|   |              |              |              |
|---|--------------|--------------|--------------|
| H | -1.415987000 | 0.799762000  | 4.882608000  |
| O | -1.749127000 | 2.844070000  | 8.163045000  |
| H | -2.229191000 | 3.623243000  | 8.495484000  |
| O | 1.570305000  | 3.217539000  | 4.441049000  |
| H | 1.977099000  | 3.989893000  | 4.899849000  |
| O | 2.617240000  | 1.342156000  | 2.731719000  |
| H | 3.121976000  | 1.937408000  | 2.151208000  |
| O | 5.366723000  | 0.647633000  | 6.901272000  |
| H | 6.144547000  | 0.350598000  | 6.396327000  |
| O | -1.245143000 | 3.287717000  | 5.530792000  |
| H | -0.577895000 | 3.437691000  | 4.828906000  |
| O | 1.809213000  | -3.131953000 | 8.344080000  |
| H | 1.148342000  | -3.836716000 | 8.233004000  |
| O | 0.089507000  | -1.514035000 | 9.634569000  |
| H | -0.332628000 | -0.626326000 | 9.769259000  |
| O | -0.611418000 | 1.123464000  | 10.100271000 |
| H | -1.130580000 | 1.656065000  | 9.450957000  |
| O | 0.289671000  | 3.272168000  | 11.604653000 |
| H | -0.416370000 | 3.194103000  | 12.268813000 |
| O | 5.094815000  | 0.267478000  | 9.630600000  |
| H | 5.384832000  | 0.352001000  | 8.687103000  |
| O | 7.623464000  | 0.721926000  | 14.064022000 |
| O | 8.612324000  | 0.192662000  | 11.977096000 |
| O | 10.213246000 | -0.412470000 | 15.397383000 |
| O | 9.506844000  | 2.487177000  | 10.279609000 |
| O | 5.691193000  | 1.651788000  | 15.656108000 |
| O | 8.069151000  | -1.484066000 | 19.536065000 |
| O | 10.110085000 | -3.931481000 | 15.136695000 |
| O | 12.530033000 | -3.462445000 | 14.011633000 |
| O | 4.856733000  | 3.190184000  | 17.676512000 |
| O | 6.691066000  | -0.168483000 | 21.324835000 |
| O | 2.496426000  | 3.543922000  | 19.094979000 |
| N | 8.481323000  | 4.478452000  | 12.091796000 |
| C | 7.280587000  | -0.513590000 | 14.751478000 |
| C | 9.472462000  | -1.630850000 | 15.457813000 |
| C | 8.271079000  | -1.660188000 | 14.486047000 |
| C | 8.922179000  | -1.870330000 | 16.878035000 |
| C | 7.124696000  | -0.178707000 | 16.237454000 |
| C | 7.801829000  | -0.907407000 | 17.221262000 |
| C | 7.497953000  | 0.760567000  | 12.620381000 |
| C | 7.298127000  | 2.226316000  | 12.212169000 |
| C | 8.583844000  | 3.058840000  | 12.436346000 |
| C | 9.746119000  | 2.376676000  | 11.688298000 |
| C | 9.868511000  | 0.899995000  | 12.137197000 |
| C | 6.235221000  | 0.869615000  | 16.615881000 |
| C | 10.440939000 | -2.761515000 | 15.057680000 |
| C | 7.465854000  | -0.725608000 | 18.592956000 |
| C | 5.909248000  | 1.069622000  | 17.973151000 |
| C | 6.499692000  | 0.233391000  | 18.972683000 |
| C | 10.925866000 | 0.112424000  | 11.372415000 |
| C | 11.832422000 | -2.376095000 | 14.567206000 |
| C | 5.010866000  | 2.199837000  | 18.379610000 |
| C | 6.106213000  | 0.392214000  | 20.403655000 |
| C | 4.340352000  | 2.086426000  | 19.714500000 |
| C | 4.910037000  | 1.250365000  | 20.702945000 |
| H | 10.976539000 | -0.929735000 | 11.733882000 |

|   |              |              |              |   |              |              |              |
|---|--------------|--------------|--------------|---|--------------|--------------|--------------|
| H | 1.211719000  | 7.046866000  | 9.033246000  | H | 10.703243000 | 0.084446000  | 10.290094000 |
| O | -1.009030000 | 0.041565000  | 5.337739000  | H | 11.919300000 | 0.573958000  | 11.522478000 |
| C | 3.183492000  | 2.838435000  | 20.045470000 | H | 7.751067000  | 4.912230000  | 12.665243000 |
| C | 4.374669000  | 1.206059000  | 22.000209000 | H | 8.183098000  | 4.602863000  | 11.114520000 |
| C | 2.653127000  | 2.777708000  | 21.344058000 | H | 12.353728000 | -1.916741000 | 15.441972000 |
| C | 3.252872000  | 1.975512000  | 22.320291000 | H | 11.752713000 | -1.565410000 | 13.819526000 |
| C | 2.657368000  | 4.967224000  | 19.047844000 | H | 10.335011000 | 2.302852000  | 9.806439000  |
| H | 6.284611000  | -0.839981000 | 14.377687000 | H | 6.268866000  | 1.581086000  | 14.861964000 |
| H | 7.742631000  | -2.618769000 | 14.633236000 | H | 8.649291000  | -2.145169000 | 19.119837000 |
| H | 8.601368000  | -1.626778000 | 13.436225000 | H | 4.842983000  | 0.558637000  | 22.747850000 |
| H | 9.756490000  | -1.730428000 | 17.593761000 | H | 12.214510000 | -4.270598000 | 14.459864000 |
| H | 8.584399000  | -2.922850000 | 16.961930000 | H | 1.749605000  | 3.355976000  | 21.571054000 |
| H | 6.632646000  | 0.135168000  | 12.321055000 | H | 2.825741000  | 1.936740000  | 23.329402000 |
| H | 6.441731000  | 2.667995000  | 12.755616000 | H | 2.399859000  | 5.433761000  | 20.019065000 |
| H | 7.039986000  | 2.240908000  | 11.138066000 | H | 1.960448000  | 5.336043000  | 18.277871000 |
| H | 8.844453000  | 3.004228000  | 13.512699000 | H | 3.690423000  | 5.234368000  | 18.760188000 |
| H | 10.689485000 | 2.895610000  | 11.963254000 | H | 9.609247000  | 0.348946000  | 15.438524000 |
| H | 10.140301000 | 0.896544000  | 13.210579000 |   |              |              |              |

## SiO<sub>2</sub>-2APS-Dox complex 2

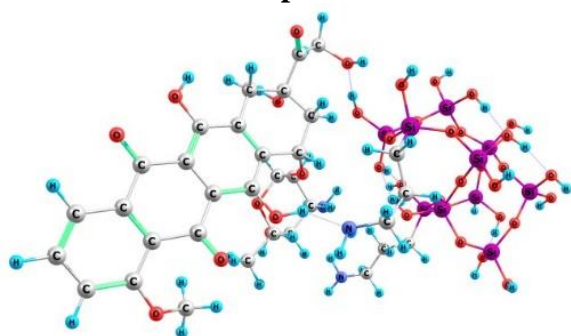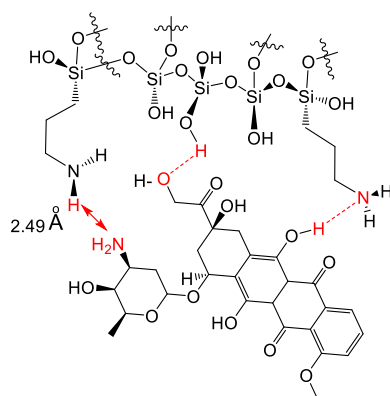

$E = -7206.970503408$

|    |              |              |              |
|----|--------------|--------------|--------------|
| Si | -1.873393000 | 2.325998000  | 5.825989000  |
| O  | -1.620642000 | 0.701087000  | 5.974632000  |
| Si | -1.648254000 | -0.488247000 | 7.124321000  |
| O  | -2.498430000 | 0.034144000  | 8.441431000  |
| Si | -3.894787000 | 0.627359000  | 9.080160000  |
| O  | -3.651920000 | 2.057515000  | 9.867209000  |
| Si | -1.143920000 | -0.511376000 | 12.074387000 |
| Si | -3.090182000 | 3.550261000  | 10.269822000 |
| Si | -0.395842000 | 2.309935000  | 10.671243000 |
| O  | -1.630304000 | 3.362005000  | 11.042952000 |
| O  | -0.792456000 | 0.778205000  | 11.116456000 |
| O  | 0.230944000  | -1.289079000 | 12.543319000 |
| Si | 1.810503000  | -1.029398000 | 13.013383000 |
| C  | 1.842235000  | -0.137823000 | 14.654480000 |
| H  | 1.430163000  | -0.824395000 | 15.422591000 |
| H  | 2.898218000  | 0.016679000  | 14.933517000 |
| C  | 1.068925000  | 1.197325000  | 14.673337000 |
| H  | 1.274309000  | 1.782644000  | 13.754733000 |
| H  | -0.013129000 | 0.976391000  | 14.649226000 |
| C  | 1.337834000  | 2.106451000  | 15.881533000 |
| H  | 0.474177000  | 2.795526000  | 15.992650000 |
| H  | 1.380223000  | 1.504850000  | 16.811545000 |
| N  | 2.600381000  | 2.873875000  | 15.748811000 |
| H  | 2.625074000  | 3.313939000  | 14.820107000 |
| H  | 2.565467000  | 3.663871000  | 16.403111000 |
| O  | 2.588226000  | -0.147994000 | 11.847370000 |
| Si | 3.000917000  | -0.037701000 | 10.246763000 |
| O  | -0.198328000 | 2.338011000  | 9.032467000  |
| Si | 0.396719000  | 3.292542000  | 7.809818000  |
| C  | 0.587471000  | 5.105980000  | 8.209028000  |
| H  | 0.880391000  | 5.585523000  | 7.249921000  |
| H  | -0.409514000 | 5.520141000  | 8.458823000  |
| C  | 1.620131000  | 5.436647000  | 9.301500000  |
| H  | 1.231473000  | 5.148848000  | 10.295520000 |
| H  | 2.535855000  | 4.833539000  | 9.155130000  |
| C  | 2.044122000  | 6.910793000  | 9.347699000  |
| H  | 2.399191000  | 7.212427000  | 8.332389000  |
| H  | 1.164515000  | 7.552138000  | 9.567902000  |
| N  | 3.057338000  | 7.098126000  | 10.396876000 |
| H  | 3.836225000  | 6.456047000  | 10.201100000 |
| H  | 3.449044000  | 8.044472000  | 10.347118000 |
| O  | -0.615271000 | 3.154024000  | 6.503841000  |
| O  | -0.107370000 | -0.848172000 | 7.560935000  |
| Si | 0.863306000  | -1.823586000 | 8.496990000  |
| O  | 1.923493000  | -0.888216000 | 9.333689000  |
| O  | 2.618844000  | -2.500876000 | 13.057039000 |
| H  | 2.305886000  | -3.155815000 | 13.705177000 |
| O  | 4.557743000  | -0.527482000 | 10.014071000 |
| H  | 4.884519000  | -1.254928000 | 10.599420000 |
| O  | 0.943712000  | 2.872183000  | 11.457172000 |
| H  | 1.783552000  | 2.514859000  | 11.084603000 |
| O  | -2.960203000 | 4.363775000  | 8.815186000  |
| H  | -2.893117000 | 5.334435000  | 8.829484000  |
| O  | -4.111098000 | 4.425118000  | 11.223340000 |

|   |              |              |              |
|---|--------------|--------------|--------------|
| H | -3.183749000 | -1.762273000 | 6.043455000  |
| O | -4.349832000 | -0.526437000 | 10.199934000 |
| H | -5.012470000 | -0.269280000 | 10.865348000 |
| O | -3.316032000 | 2.735328000  | 6.555852000  |
| H | -3.264868000 | 3.440296000  | 7.246041000  |
| O | -1.913903000 | 2.588086000  | 4.195129000  |
| H | -2.164235000 | 3.481813000  | 3.905395000  |
| O | 1.878949000  | 2.561091000  | 7.472090000  |
| H | 2.465404000  | 3.013944000  | 6.840910000  |
| O | -5.066072000 | 0.787883000  | 7.922172000  |
| H | -4.811085000 | 1.440003000  | 7.235159000  |
| O | 1.816035000  | -2.778842000 | 7.529094000  |
| H | 1.346599000  | -3.369811000 | 6.916324000  |
| O | -0.059796000 | -2.795854000 | 9.460857000  |
| H | -0.779701000 | -2.418298000 | 10.017476000 |
| O | -1.967703000 | -1.670008000 | 11.212439000 |
| H | -2.851708000 | -1.403108000 | 10.862476000 |
| O | -2.017130000 | 0.087129000  | 13.351314000 |
| H | -2.304535000 | -0.561784000 | 14.016634000 |
| O | 2.904988000  | 1.573998000  | 9.847148000  |
| H | 2.624299000  | 1.815358000  | 8.928917000  |
| O | 5.355499000  | 2.012727000  | 13.740688000 |
| O | 6.857425000  | 3.815948000  | 13.806729000 |
| O | 7.433733000  | -0.321137000 | 12.713631000 |
| O | 6.688919000  | 5.758953000  | 11.505666000 |
| O | 5.143543000  | 3.073562000  | 16.678080000 |
| O | 9.671936000  | -0.059599000 | 17.093103000 |
| O | 6.799421000  | -3.325030000 | 14.504441000 |
| O | 5.248813000  | -2.605740000 | 11.668873000 |
| O | 5.971925000  | 4.317951000  | 18.857745000 |
| O | 10.211257000 | 1.285033000  | 19.298075000 |
| O | 7.499563000  | 6.697102000  | 19.466764000 |
| N | 4.901603000  | 4.212552000  | 10.037616000 |
| C | 5.447169000  | 0.987437000  | 14.740560000 |
| C | 6.930140000  | -0.986184000 | 13.869690000 |
| C | 5.518169000  | -0.433114000 | 14.150404000 |
| C | 7.841323000  | -0.790175000 | 15.099393000 |
| C | 6.485639000  | 1.258424000  | 15.816223000 |
| C | 7.624799000  | 0.459898000  | 15.932371000 |
| C | 6.516232000  | 2.595194000  | 13.165909000 |
| C | 6.235306000  | 2.812570000  | 11.672750000 |
| C | 5.166245000  | 3.903082000  | 11.446446000 |
| C | 5.569154000  | 5.185623000  | 12.197132000 |
| C | 5.893668000  | 4.878153000  | 13.678222000 |
| C | 6.258691000  | 2.337987000  | 16.725503000 |
| C | 6.777306000  | -2.518216000 | 13.594000000 |
| C | 8.584353000  | 0.736631000  | 16.951047000 |
| C | 7.244258000  | 2.654674000  | 17.691526000 |
| C | 8.409657000  | 1.833649000  | 17.817756000 |
| C | 6.457440000  | 6.087445000  | 14.418886000 |
| C | 6.531827000  | -2.994370000 | 12.150648000 |
| C | 7.066746000  | 3.826260000  | 18.599258000 |
| C | 9.389922000  | 2.110539000  | 18.908885000 |
| C | 8.305096000  | 4.378661000  | 19.240245000 |



|   |              |              |              |   |              |              |              |
|---|--------------|--------------|--------------|---|--------------|--------------|--------------|
| H | -4.172143000 | 4.175870000  | 12.161804000 | C | 9.365545000  | 3.481777000  | 19.520067000 |
| O | -2.311038000 | -1.853552000 | 6.462124000  | C | 8.382740000  | 5.703109000  | 19.750707000 |
| C | 10.440334000 | 5.132064000  | 20.932899000 | C | 10.417704000 | 3.850449000  | 20.371957000 |
| C | 7.082306000  | 6.920303000  | 18.112012000 | C | 9.443822000  | 6.054972000  | 20.607411000 |
| H | 4.456751000  | 1.041439000  | 15.223675000 | H | 7.390638000  | 6.439300000  | 13.942943000 |
| H | 5.028363000  | -1.114595000 | 14.870784000 | H | 5.726938000  | 6.917536000  | 14.414132000 |
| H | 4.929152000  | -0.451318000 | 13.220572000 | H | 4.559193000  | 3.371255000  | 9.565133000  |
| H | 8.889658000  | -0.844935000 | 14.738161000 | H | 5.776060000  | 4.480817000  | 9.575469000  |
| H | 7.704230000  | -1.663062000 | 15.766612000 | H | 6.657207000  | -4.095310000 | 12.141105000 |
| H | 7.391283000  | 1.941321000  | 13.307726000 | H | 7.277017000  | -2.547336000 | 11.470947000 |
| H | 5.914528000  | 1.856719000  | 11.220837000 | H | 6.727371000  | 6.706912000  | 11.709949000 |
| H | 7.178285000  | 3.124555000  | 11.182573000 | H | 4.359126000  | 2.701118000  | 16.173108000 |
| H | 4.217546000  | 3.548094000  | 11.894573000 | H | 9.703442000  | -0.719478000 | 16.379773000 |
| H | 4.706674000  | 5.883639000  | 12.174703000 | H | 11.209175000 | 3.125769000  | 20.586678000 |
| H | 4.946236000  | 4.563832000  | 14.164624000 | H | 4.519546000  | -2.867708000 | 12.271500000 |
| H | 8.384244000  | -0.509806000 | 12.620359000 | H | 9.475674000  | 7.078875000  | 20.997768000 |
| H | 6.682671000  | 5.824396000  | 15.466035000 | H | 11.256728000 | 5.429897000  | 21.601628000 |
|   |              |              |              | H | 7.770624000  | 6.430468000  | 17.398376000 |
|   |              |              |              | H | 7.109130000  | 8.010621000  | 17.935515000 |
|   |              |              |              | H | 6.059567000  | 6.540271000  | 17.945740000 |

## SiO<sub>2</sub>-PMIDA-Dox complex 1

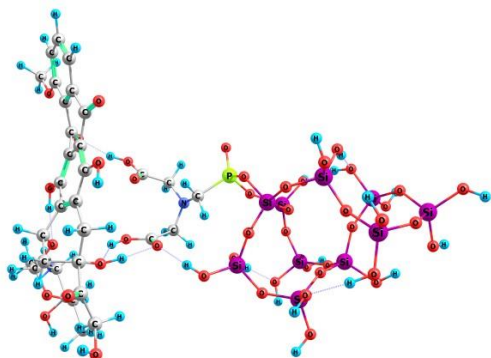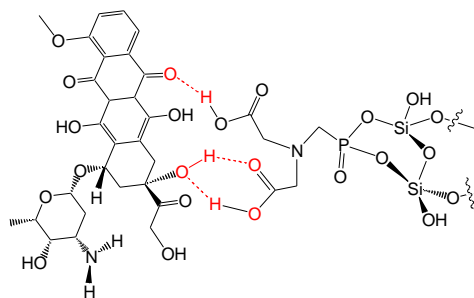

$E = -7976.763179977$

|   |              |              |              |    |               |              |              |
|---|--------------|--------------|--------------|----|---------------|--------------|--------------|
| O | -0.528165000 | 2.539002000  | 2.391857000  | H  | 0.667671000   | 4.976693000  | 3.504562000  |
| O | 1.728466000  | 2.462405000  | 1.710140000  | H  | 3.094985000   | 4.908535000  | 3.628791000  |
| O | 0.360498000  | 0.168893000  | 4.029166000  | H  | 1.829799000   | 2.807822000  | 3.771549000  |
| O | 3.376516000  | 4.846023000  | 1.551803000  | H  | 0.275536000   | -0.220307000 | 4.925682000  |
| O | -3.091767000 | 3.356447000  | 2.837695000  | H  | 3.581160000   | 1.180751000  | 3.215730000  |
| O | -4.115507000 | -1.867822000 | 4.360587000  | H  | 4.321880000   | 2.304911000  | 2.030555000  |
| O | 0.576238000  | -2.857510000 | 2.167748000  | H  | 4.364788000   | 2.679229000  | 3.784780000  |
| O | 3.175099000  | -2.648702000 | 2.787629000  | H  | 0.488038000   | 7.084618000  | 2.271387000  |
| O | -5.163177000 | 3.888241000  | 4.668528000  | H  | 1.980174000   | 6.846501000  | 1.650916000  |
| O | -6.577481000 | -1.066366000 | 4.973242000  | H  | 2.407475000   | -1.312970000 | 4.184468000  |
| O | -7.626327000 | 4.692827000  | 3.776151000  | H  | 2.644665000   | -0.633618000 | 2.569880000  |
| N | 1.392668000  | 6.642923000  | 2.467250000  | H  | 4.319226000   | 4.799249000  | 1.778159000  |
| C | -1.237810000 | 1.342005000  | 1.974438000  | H  | -2.130828000  | 3.440076000  | 2.640685000  |
| C | -0.142938000 | -0.707322000 | 3.023884000  | H  | -3.389061000  | -2.453574000 | 4.085331000  |
| C | -0.331629000 | 0.119819000  | 1.736706000  | H  | -8.918782000  | -0.357814000 | 4.553204000  |
| C | -1.513443000 | -1.294156000 | 3.401402000  | H  | 2.634909000   | -3.275128000 | 2.265443000  |
| C | -2.391538000 | 1.053256000  | 2.931061000  | H  | -10.158137000 | 3.731272000  | 3.908394000  |
| C | -2.605138000 | -0.240553000 | 3.425744000  | H  | -10.726203000 | 1.357255000  | 4.263201000  |
| C | 0.456537000  | 3.004343000  | 1.437923000  | H  | -9.259544000  | 5.559791000  | 2.764796000  |
| C | 0.474527000  | 4.538072000  | 1.385109000  | H  | -8.048698000  | 6.661554000  | 3.515690000  |
| C | 1.225531000  | 5.189878000  | 2.569846000  | H  | -9.240688000  | 5.798020000  | 4.553637000  |
| C | 2.603627000  | 4.518700000  | 2.712590000  | Si | 1.477822000   | -1.712567000 | 9.661525000  |
| C | 2.428732000  | 2.993736000  | 2.857892000  | O  | 0.022545000   | -2.373746000 | 10.161591000 |
| C | -3.339919000 | 2.077187000  | 3.208097000  | Si | -1.096677000  | -2.244126000 | 11.353438000 |
| C | 0.885091000  | -1.824267000 | 2.735168000  | O  | -0.413616000  | -1.594727000 | 12.718888000 |
| C | -3.867095000 | -0.590254000 | 3.983724000  | Si | -0.413914000  | -0.037853000 | 13.262836000 |
| C | -4.565532000 | 1.746334000  | 3.812270000  | O  | 1.103059000   | 0.497055000  | 13.545141000 |
| C | -4.876047000 | 0.387548000  | 4.116747000  | Si | -0.360152000  | -3.250216000 | 16.219972000 |
| C | 3.751598000  | 2.243496000  | 2.975150000  | Si | 2.675542000   | 0.040818000  | 13.836409000 |
| C | 2.341873000  | -1.562601000 | 3.104734000  | Si | 2.251526000   | -3.043745000 | 14.404147000 |
| C | -5.536418000 | 2.801865000  | 4.220197000  | O  | 2.750103000   | -1.462806000 | 14.506448000 |
| C | -6.262431000 | 0.034054000  | 4.532631000  | O  | 0.720596000   | -3.171539000 | 14.983721000 |
| C | -6.975552000 | 2.442241000  | 4.144769000  | O  | -0.769636000  | -4.825794000 | 16.521011000 |
| C | -7.324396000 | 1.085262000  | 4.331706000  | Si | 0.075499000   | -6.246843000 | 16.628421000 |
| C | -8.003475000 | 3.417282000  | 3.991532000  | O  | 0.118366000   | -7.073176000 | 15.206668000 |
| C | -8.669925000 | 0.694220000  | 4.384689000  | Si | 0.152628000   | -6.831932000 | 13.564509000 |
| C | -9.350860000 | 3.004365000  | 4.034405000  | O  | 2.275025000   | -3.457642000 | 12.810397000 |
| C | -9.671359000 | 1.656543000  | 4.231143000  | Si | 3.030291000   | -3.780229000 | 11.392063000 |
| C | -8.610133000 | 5.722347000  | 3.646871000  | O  | 2.721369000   | -2.618450000 | 10.253465000 |
| H | -1.713338000 | 1.583778000  | 0.997315000  | O  | -1.826476000  | -3.678219000 | 11.592438000 |
| H | -0.806222000 | -0.527364000 | 0.977915000  | Si | -2.100200000  | -4.866248000 | 12.734646000 |
| H | 0.638448000  | 0.441047000  | 1.328783000  | O  | -0.624330000  | -5.410654000 | 13.216814000 |
| H | -1.447096000 | -1.772611000 | 4.400329000  | O  | -0.733427000  | -7.109335000 | 17.779216000 |
| H | -1.746711000 | -2.106980000 | 2.685686000  | H  | -0.447797000  | -8.027752000 | 17.923173000 |
| H | 0.178886000  | 2.611600000  | 0.440582000  | O  | -0.623705000  | -8.095198000 | 12.817498000 |
| H | -0.561037000 | 4.919575000  | 1.307200000  | H  | -1.521859000  | -7.880462000 | 12.498111000 |
| H | 0.989809000  | 4.820817000  | 0.447773000  | O  | 4.659199000   | -3.845333000 | 11.658801000 |
| P | -2.277056000 | 0.501653000  | 10.935722000 | H  | 5.236113000   | -3.777466000 | 10.878515000 |
| C | -1.585582000 | 0.810373000  | 9.265184000  | O  | 3.268844000   | -3.980990000 | 15.305423000 |
| H | -0.710348000 | 0.154221000  | 9.186214000  | O  | -2.879369000  | 1.936024000  | 6.632818000  |
| H | -2.348687000 | 0.390004000  | 8.575484000  | O  | -3.611034000  | 1.101721000  | 11.235392000 |
| N | -1.188271000 | 2.169627000  | 8.957764000  | O  | -1.324667000  | -0.012598000 | 14.649945000 |
| C | 0.070501000  | 2.308845000  | 8.222277000  | H  | -1.290309000  | 0.782419000  | 15.212482000 |
|   |              |              |              | O  | 1.555543000   | -0.163339000 | 10.227685000 |
|   |              |              |              | H  | 2.261887000   | 0.042231000  | 10.885118000 |

|   |              |              |              |   |              |              |              |
|---|--------------|--------------|--------------|---|--------------|--------------|--------------|
| H | 0.287888000  | 3.381342000  | 8.081612000  | O | 1.546777000  | -1.759119000 | 8.019785000  |
| H | 0.885503000  | 1.862632000  | 8.821463000  | H | 1.078705000  | -1.025320000 | 7.561592000  |
| C | 0.098570000  | 1.596247000  | 6.859163000  | O | 2.361725000  | -5.230285000 | 10.906710000 |
| O | -0.011180000 | 2.397297000  | 5.807576000  | H | 2.708846000  | -5.638129000 | 10.094154000 |
| H | -0.031061000 | 1.870934000  | 4.965930000  | O | -1.129013000 | 0.879556000  | 12.044940000 |
| O | 0.213760000  | 0.375113000  | 6.755676000  | O | -2.841413000 | -6.169714000 | 12.023261000 |
| C | -2.244026000 | 3.120899000  | 8.663725000  | H | -3.793639000 | -6.117913000 | 11.832805000 |
| H | -3.033823000 | 3.040597000  | 9.437588000  | O | -3.031235000 | -4.297654000 | 13.960673000 |
| H | -1.850082000 | 4.152279000  | 8.735237000  | H | -2.672190000 | -3.625380000 | 14.588189000 |
| C | -2.938661000 | 2.949312000  | 7.301933000  | O | -1.805935000 | -2.558214000 | 15.778597000 |
| O | -3.630734000 | 4.039082000  | 6.961942000  | H | -1.761061000 | -1.622576000 | 15.468246000 |
| H | 2.843679000  | -4.691069000 | 15.833212000 | O | 0.356742000  | -2.511966000 | 17.516331000 |
| O | 3.367818000  | 0.131069000  | 12.324770000 | H | -0.195151000 | -2.399571000 | 18.309926000 |
| H | 4.306405000  | -0.105911000 | 12.221302000 | O | 1.743157000  | -6.784376000 | 13.151686000 |
| O | 3.433997000  | 1.120291000  | 14.817330000 | H | 1.964802000  | -6.343840000 | 12.297360000 |
| H | 3.270499000  | 1.049920000  | 15.773517000 | O | 1.676995000  | -5.911201000 | 16.993573000 |
| O | -2.296254000 | -1.132833000 | 10.932801000 | H | 1.858604000  | -5.602681000 | 17.899441000 |
| H | -4.067295000 | 3.925727000  | 6.073555000  |   |              |              |              |

## SiO<sub>2</sub>-PMIDA-Dox complex 2

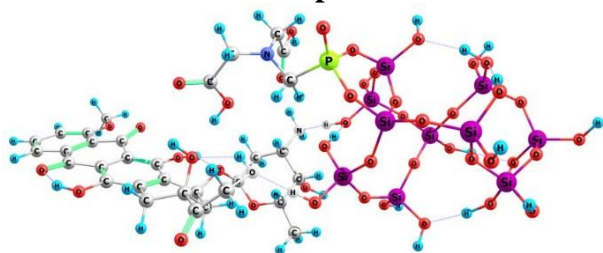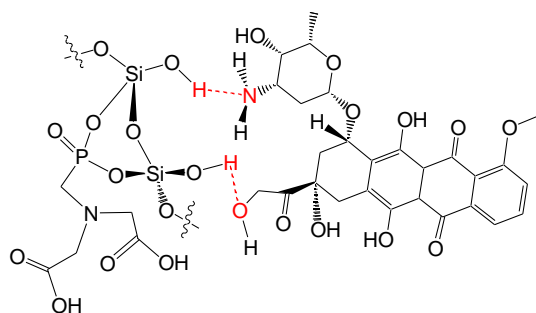

$E = -7976.794151513$

|    |              |              |              |
|----|--------------|--------------|--------------|
| Si | 0.372805000  | -1.230571000 | 4.335369000  |
| O  | -0.348825000 | -2.744390000 | 4.348537000  |
| Si | -0.050837000 | -4.150340000 | 5.129321000  |
| O  | 1.534536000  | -4.615996000 | 5.013388000  |
| Si | 2.636541000  | -5.094975000 | 6.144917000  |
| O  | 4.066554000  | -4.340459000 | 5.938831000  |
| Si | 3.315274000  | -7.371895000 | 2.679071000  |
| Si | 4.842836000  | -3.229964000 | 4.951029000  |
| Si | 3.696924000  | -4.270524000 | 2.216333000  |
| O  | 4.751903000  | -3.780416000 | 3.387190000  |
| O  | 3.066436000  | -5.744287000 | 2.610786000  |
| O  | 3.068192000  | -8.042998000 | 1.185305000  |
| Si | 2.302992000  | -7.585836000 | -0.210822000 |
| O  | 0.708586000  | -7.277504000 | 0.137810000  |
| Si | -0.186725000 | -5.895808000 | 0.375805000  |
| O  | 2.452658000  | -3.185783000 | 2.111371000  |
| Si | 1.826149000  | -1.748957000 | 1.612972000  |
| O  | 0.991746000  | -0.998320000 | 2.819387000  |
| O  | -1.032047000 | -5.336917000 | 4.572502000  |
| Si | -1.142165000 | -6.306217000 | 3.221555000  |
| O  | -0.288959000 | -5.571842000 | 2.002267000  |
| O  | 2.471997000  | -8.764966000 | -1.351841000 |
| H  | 2.250906000  | -9.673481000 | -1.082851000 |
| O  | -1.714628000 | -6.089869000 | -0.228706000 |
| H  | -2.405810000 | -6.242404000 | 0.444446000  |
| O  | 2.988622000  | -0.656099000 | 1.163904000  |
| H  | 3.554827000  | -0.896869000 | 0.410640000  |
| O  | 4.546744000  | -4.368257000 | 0.803382000  |
| H  | 4.192015000  | -5.014200000 | 0.151766000  |
| O  | 4.106133000  | -1.779783000 | 5.086126000  |
| H  | 4.540333000  | -0.885029000 | 5.506468000  |
| O  | 6.425455000  | -3.134644000 | 5.417530000  |
| H  | 6.960641000  | -3.942186000 | 5.334886000  |
| O  | -0.338066000 | -3.949051000 | 6.772776000  |
| P  | 0.552713000  | -4.060957000 | 8.138321000  |
| C  | 0.973894000  | -2.322470000 | 8.583371000  |
| H  | 1.581011000  | -1.889011000 | 7.765676000  |
| H  | 0.011706000  | -1.779946000 | 8.558532000  |
| N  | 1.570011000  | -2.209177000 | 9.896665000  |
| C  | 2.893431000  | -2.719914000 | 10.151980000 |
| H  | 3.111479000  | -2.630609000 | 11.232782000 |
| H  | 2.971587000  | -3.806740000 | 9.932658000  |
| C  | 4.064276000  | -2.053825000 | 9.415794000  |
| O  | 3.994330000  | -1.139877000 | 8.625138000  |
| H  | 5.958877000  | -2.219136000 | 9.275962000  |
| O  | 5.224442000  | -2.651223000 | 9.758618000  |
| C  | 0.909949000  | -1.399938000 | 10.888292000 |
| H  | -0.174531000 | -1.636716000 | 10.929478000 |
| H  | 1.293852000  | -1.640421000 | 11.897574000 |
| C  | 0.985084000  | 0.128586000  | 10.736507000 |
| O  | 1.585218000  | 0.527421000  | 9.609791000  |
| H  | 1.475262000  | 1.498076000  | 9.502202000  |
| O  | 0.493025000  | 0.889859000  | 11.549155000 |
| C  | 4.145419000  | 2.757528000  | 6.670602000  |
| C  | 3.795039000  | 1.373789000  | 6.094795000  |
| C  | 3.245916000  | 1.561854000  | 4.668684000  |
| C  | 1.995047000  | 2.463035000  | 4.731749000  |
| C  | 2.072426000  | 5.514679000  | 9.892395000  |

|   |              |              |              |
|---|--------------|--------------|--------------|
| O | -0.101634000 | -4.872982000 | 9.203242000  |
| O | 2.807641000  | -6.743800000 | 6.057947000  |
| H | 3.569638000  | -7.139617000 | 6.519583000  |
| O | 1.523950000  | -1.173037000 | 5.507773000  |
| H | 2.461667000  | -1.464902000 | 5.329702000  |
| O | -0.768659000 | -0.075551000 | 4.583924000  |
| H | -0.932853000 | 0.182138000  | 5.524013000  |
| O | 0.764297000  | -2.154642000 | 0.382554000  |
| H | 0.220130000  | -1.441210000 | 0.004490000  |
| O | 1.972957000  | -4.706472000 | 7.635421000  |
| O | -2.711004000 | -6.356449000 | 2.683076000  |
| H | -3.350613000 | -6.900426000 | 3.174520000  |
| O | -0.619500000 | -7.830922000 | 3.547962000  |
| H | 0.354902000  | -7.987975000 | 3.570226000  |
| O | 2.198110000  | -8.077662000 | 3.697268000  |
| H | 2.320916000  | -7.782024000 | 4.631642000  |
| O | 4.872290000  | -7.602853000 | 3.184498000  |
| H | 5.165653000  | -8.525498000 | 3.281789000  |
| O | 0.639471000  | -4.745419000 | -0.475843000 |
| H | 0.595032000  | -3.791727000 | -0.208644000 |
| O | 3.017803000  | -6.201940000 | -0.817982000 |
| H | 2.344288000  | -5.503602000 | -0.994195000 |
| O | 2.101454000  | 3.517425000  | 7.710440000  |
| O | 2.300370000  | 3.734488000  | 5.352490000  |
| O | 4.276376000  | 2.123064000  | 3.849458000  |
| O | 3.292961000  | 5.245936000  | 9.369158000  |
| H | 3.191205000  | 4.443487000  | 8.813845000  |
| O | -1.724108000 | 6.349354000  | 11.387327000 |
| H | -1.627917000 | 6.941181000  | 12.186374000 |
| O | 4.250084000  | 6.064768000  | 11.708596000 |
| O | -0.597546000 | 7.790594000  | 13.183431000 |
| O | 5.396189000  | 8.055244000  | 12.982403000 |
| N | 4.936860000  | 0.435580000  | 6.102036000  |
| C | 1.000533000  | 4.457012000  | 7.815050000  |
| H | 1.238011000  | 5.323329000  | 7.164334000  |
| C | -1.243956000 | 3.359303000  | 8.403383000  |
| C | -2.511585000 | 2.701322000  | 7.796374000  |
| C | -2.515902000 | 1.173983000  | 7.596901000  |
| H | -3.245415000 | 0.943126000  | 6.801555000  |
| H | -2.914098000 | 0.733661000  | 8.538428000  |
| O | -1.271382000 | 0.581533000  | 7.234569000  |
| H | -0.612034000 | 0.830744000  | 7.912714000  |
| O | -3.499133000 | 3.354112000  | 7.525880000  |
| O | -0.522629000 | 2.373025000  | 9.159874000  |
| H | -0.889773000 | 2.287725000  | 10.060238000 |
| C | -0.312309000 | 3.839539000  | 7.276032000  |
| H | -0.859013000 | 4.587885000  | 6.676152000  |
| C | -1.606152000 | 4.572165000  | 9.271363000  |
| C | 0.895736000  | 5.041213000  | 9.227429000  |
| C | -0.361039000 | 5.246475000  | 9.804523000  |
| C | 2.980089000  | 3.751804000  | 6.577001000  |
| H | -2.225892000 | 5.267391000  | 8.674420000  |
| H | 3.360302000  | 4.790082000  | 6.666161000  |
| H | 4.481752000  | 2.674610000  | 7.720403000  |
| C | 2.700584000  | 9.757366000  | 14.832725000 |
| C | 6.573728000  | 8.649612000  | 13.532610000 |
| H | -0.058426000 | 3.009625000  | 6.600046000  |
| H | -2.245272000 | 4.261586000  | 10.119412000 |
| H | 4.986612000  | 3.181793000  | 6.092183000  |

|   |              |             |              |   |             |              |              |
|---|--------------|-------------|--------------|---|-------------|--------------|--------------|
| C | -0.483038000 | 6.087639000 | 10.944782000 | H | 2.999343000 | 0.904734000  | 6.701291000  |
| C | 1.968832000  | 6.278290000 | 11.068590000 | H | 2.929890000 | 0.583989000  | 4.266243000  |
| C | 0.673764000  | 6.623605000 | 11.560678000 | H | 1.240140000 | 1.924487000  | 5.342903000  |
| C | 1.395629000  | 2.773860000 | 3.363281000  | H | 0.495643000 | 3.405356000  | 3.466847000  |
| C | 3.188359000  | 6.657578000 | 11.854232000 | H | 2.128126000 | 3.309234000  | 2.733164000  |
| C | 0.525044000  | 7.524579000 | 12.710780000 | H | 1.103061000 | 1.838747000  | 2.854536000  |
| C | 3.037163000  | 7.762166000 | 12.856338000 | H | 5.221621000 | 0.226137000  | 7.065727000  |
| C | 1.745548000  | 8.155278000 | 13.290715000 | H | 5.743464000 | 0.844238000  | 5.615611000  |
| C | 4.175692000  | 8.409098000 | 13.428656000 | H | 4.222878000 | 1.717909000  | 2.968567000  |
| C | 1.577394000  | 9.141768000 | 14.275479000 | H | 0.568863000 | 9.420093000  | 14.595712000 |
| C | 3.986060000  | 9.401947000 | 14.415036000 | H | 4.845824000 | 9.907039000  | 14.863388000 |
|   |              |             |              | H | 2.578838000 | 10.529350000 | 15.601877000 |
|   |              |             |              | H | 6.608994000 | 9.740750000  | 13.346456000 |
|   |              |             |              | H | 7.421718000 | 8.168675000  | 13.018771000 |
|   |              |             |              | H | 6.655091000 | 8.459351000  | 14.620460000 |

### SiO<sub>2</sub>-PMIDA-Dox complex 3

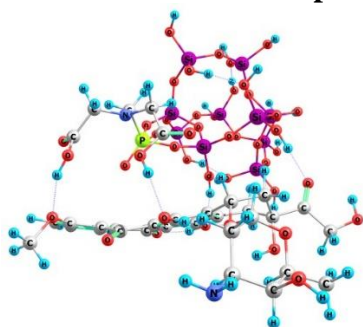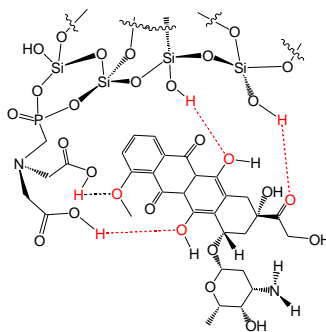

$E = -7976.782308837$

|   |              |              |               |
|---|--------------|--------------|---------------|
| O | 3.732037000  | -0.529200000 | -2.081363000  |
| O | 4.545322000  | -1.208484000 | 0.003611000   |
| O | 2.085751000  | 1.448315000  | -0.035878000  |
| O | 7.434422000  | -1.533537000 | 0.436358000   |
| O | 3.468634000  | -0.174291000 | -4.708273000  |
| O | -0.834121000 | 2.957803000  | -3.241366000  |
| O | -0.712159000 | -0.407822000 | 1.076746000   |
| O | 0.200455000  | 0.471644000  | 3.439778000   |
| O | 3.598759000  | 1.324739000  | -6.943478000  |
| O | -0.847735000 | 3.927680000  | -5.566365000  |
| O | 2.801763000  | 1.288797000  | -9.583621000  |
| N | 8.175661000  | -0.936614000 | -2.222884000  |
| C | 2.290312000  | -0.703808000 | -2.203223000  |
| C | 1.033480000  | 0.530287000  | -0.316533000  |
| C | 1.546466000  | -0.823639000 | -0.858885000  |
| C | 0.055229000  | 1.122619000  | -1.355254000  |
| C | 1.782484000  | 0.421909000  | -3.101668000  |
| C | 0.705916000  | 1.230870000  | -2.719771000  |
| C | 4.434969000  | -1.562723000 | -1.352416000  |
| C | 5.804532000  | -1.820777000 | -1.995906000  |
| C | 6.819751000  | -0.684128000 | -1.726776000  |
| C | 6.857667000  | -0.396494000 | -0.213727000  |
| C | 5.428993000  | -0.098579000 | 0.293092000   |
| C | 2.396416000  | 0.598123000  | -4.378332000  |
| C | 0.306521000  | 0.269445000  | 1.014386000   |
| C | 0.198527000  | 2.171655000  | -3.648080000  |
| C | 1.848646000  | 1.479324000  | -5.327887000  |
| C | 0.716810000  | 2.258123000  | -4.956545000  |
| C | 5.347327000  | 0.166900000  | 1.791630000   |
| C | 0.889917000  | 0.860267000  | 2.281253000   |
| C | 2.447179000  | 1.651509000  | -6.694930000  |
| C | 0.066008000  | 3.162966000  | -5.926050000  |
| C | 1.581135000  | 2.297475000  | -7.737679000  |
| C | 0.486795000  | 3.107983000  | -7.345455000  |
| C | 1.851141000  | 2.168344000  | -9.120796000  |
| C | -0.255173000 | 3.831935000  | -8.290315000  |
| C | 1.077015000  | 2.864326000  | -10.061347000 |
| C | 0.047557000  | 3.715849000  | -9.648562000  |
| C | 4.021463000  | 1.846092000  | -10.109329000 |
| H | 2.117902000  | -1.651257000 | -2.754125000  |
| H | 0.675937000  | -1.480239000 | -1.022064000  |
| H | 2.189764000  | -1.315857000 | -0.113374000  |
| H | -0.297440000 | 2.114618000  | -1.022986000  |
| H | -0.840017000 | 0.475983000  | -1.423449000  |
| H | 3.827427000  | -2.488026000 | -1.380315000  |
| H | 5.685764000  | -2.001532000 | -3.081195000  |
| H | 6.195025000  | -2.758007000 | -1.556138000  |
| H | 6.448734000  | 0.239255000  | -2.215865000  |
| P | -2.461001000 | -0.225366000 | -6.924249000  |
| C | -2.074471000 | -1.909380000 | -7.572336000  |
| H | -2.773684000 | -2.606425000 | -7.067754000  |
| H | -2.371413000 | -1.862850000 | -8.636790000  |
| N | -0.692810000 | -2.325768000 | -7.447907000  |
| C | -0.347947000 | -3.055034000 | -6.240895000  |
| H | -1.183043000 | -3.015212000 | -5.520919000  |

|    |               |              |               |
|----|---------------|--------------|---------------|
| H  | 7.481177000   | 0.506035000  | -0.041310000  |
| H  | 5.071891000   | 0.800045000  | -0.251417000  |
| H  | 2.737120000   | 1.438298000  | -0.757356000  |
| H  | 4.323830000   | 0.466980000  | 2.076644000   |
| H  | 5.624485000   | -0.734090000 | 2.368270000   |
| H  | 6.032775000   | 0.987090000  | 2.070641000   |
| H  | 8.142302000   | -1.189240000 | -3.216261000  |
| H  | 8.553971000   | -1.758997000 | -1.740562000  |
| H  | 0.898262000   | 1.966136000  | 2.145423000   |
| H  | 1.957553000   | 0.557017000  | 2.333416000   |
| H  | 7.807774000   | -1.251154000 | 1.287046000   |
| H  | 3.901703000   | -0.462891000 | -3.866848000  |
| H  | -1.027974000  | 3.589065000  | -4.006271000  |
| H  | -1.083437000  | 4.460410000  | -7.950208000  |
| H  | -0.602396000  | -0.007985000 | 3.155409000   |
| H  | 1.288063000   | 2.716902000  | -11.127005000 |
| H  | -0.539057000  | 4.264627000  | -10.393973000 |
| H  | 3.813236000   | 2.585672000  | -10.905365000 |
| H  | 4.596182000   | 1.008588000  | -10.537713000 |
| H  | 4.602819000   | 2.323995000  | -9.299792000  |
| Si | -5.531838000  | -3.511784000 | -5.472314000  |
| O  | -5.917160000  | -2.032551000 | -6.139694000  |
| Si | -5.380464000  | -0.484394000 | -6.024279000  |
| O  | -4.788810000  | -0.238098000 | -4.494260000  |
| Si | -3.234206000  | 0.002736000  | -3.991267000  |
| O  | -2.783136000  | -1.028484000 | -2.810526000  |
| Si | -5.586110000  | 2.134470000  | -1.169100000  |
| Si | -2.962203000  | -2.199619000 | -1.654687000  |
| Si | -5.718636000  | -1.051390000 | -0.945541000  |
| O  | -4.279645000  | -1.847846000 | -0.715178000  |
| O  | -5.383508000  | 0.509998000  | -1.345115000  |
| O  | -7.122918000  | 2.484145000  | -0.661192000  |
| Si | -8.673385000  | 2.000737000  | -0.940202000  |
| O  | -9.026640000  | 2.130604000  | -2.553654000  |
| Si | -9.777787000  | 1.239324000  | -3.736622000  |
| O  | -6.503636000  | -1.731178000 | -2.231701000  |
| Si | -7.253322000  | -3.054741000 | -2.855569000  |
| O  | -6.335458000  | -3.738865000 | -4.041650000  |
| O  | -6.564909000  | 0.556478000  | -6.424676000  |
| Si | -7.573028000  | 1.784876000  | -5.913433000  |
| O  | -8.758521000  | 1.056981000  | -5.023374000  |
| O  | -9.593996000  | 3.012755000  | -0.015744000  |
| H  | -10.554525000 | 2.862466000  | -0.013648000  |
| O  | -11.132269000 | 2.102605000  | -4.127016000  |
| H  | -11.685335000 | 1.737367000  | -4.839092000  |
| O  | -7.628079000  | -4.181673000 | -1.704858000  |
| H  | -6.919160000  | -4.761896000 | -1.379708000  |
| O  | -6.576141000  | -1.174570000 | 0.456331000   |
| H  | -7.440752000  | -0.708546000 | 0.408020000   |
| O  | -3.169820000  | -3.614333000 | -2.507765000  |
| H  | -3.212424000  | -4.449125000 | -2.007933000  |
| O  | -1.614861000  | -2.338668000 | -0.730942000  |
| H  | -1.392137000  | -1.633873000 | -0.078549000  |
| O  | -4.100690000  | -0.206313000 | -7.074882000  |
| O  | -3.906228000  | -3.589713000 | -5.190980000  |
| H  | -3.610817000  | -3.679455000 | -4.252986000  |
| O  | -6.028100000  | -4.588884000 | -6.622321000  |

|   |              |              |               |   |               |              |              |
|---|--------------|--------------|---------------|---|---------------|--------------|--------------|
| H | -0.171680000 | -4.138971000 | -6.437208000  | H | -5.871967000  | -5.529591000 | -6.430867000 |
| C | 0.886897000  | -2.567630000 | -5.483851000  | O | -8.671075000  | -2.477445000 | -3.512760000 |
| O | 1.701715000  | -1.810082000 | -6.215423000  | H | -9.174561000  | -3.103751000 | -4.063888000 |
| H | 2.488118000  | -1.529159000 | -5.688405000  | O | -2.227086000  | -0.302838000 | -5.300423000 |
| O | 1.103775000  | -2.893398000 | -4.329671000  | O | -8.293127000  | 2.481284000  | -7.229047000 |
| C | -0.012556000 | -2.720790000 | -8.681985000  | H | -7.700637000  | 2.882318000  | -7.887861000 |
| H | 0.831871000  | -3.383084000 | -8.434026000  | O | -6.754609000  | 2.932774000  | -5.081200000 |
| H | -0.689081000 | -3.274047000 | -9.369329000  | H | -6.428614000  | 2.827302000  | -4.157656000 |
| C | 0.514449000  | -1.488016000 | -9.427131000  | O | -5.399883000  | 2.878503000  | -2.649573000 |
| O | 1.822855000  | -1.301696000 | -9.240587000  | H | -4.558799000  | 2.593720000  | -3.086962000 |
| H | 2.125063000  | -0.432424000 | -9.607487000  | O | -4.476252000  | 2.622093000  | -0.046867000 |
| O | -0.189030000 | -0.757322000 | -10.097824000 | H | -4.370909000  | 3.580691000  | 0.078885000  |
| O | -1.797422000 | 0.950795000  | -7.555015000  | O | -10.183895000 | -0.240515000 | -3.127228000 |
| O | -3.147219000 | 1.580935000  | -3.523655000  | H | -9.610282000  | -1.022871000 | -3.324557000 |
|   |              |              |               | O | -8.806081000  | 0.395995000  | -0.475096000 |
|   |              |              |               | H | -9.437306000  | -0.126359000 | -1.010922000 |
|   |              |              |               | H | -2.292456000  | 2.027933000  | -3.305562000 |

## SiO<sub>2</sub>-PMIDA-Dox complex 4

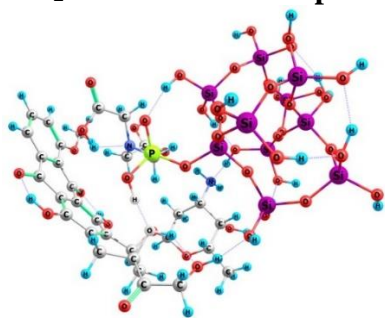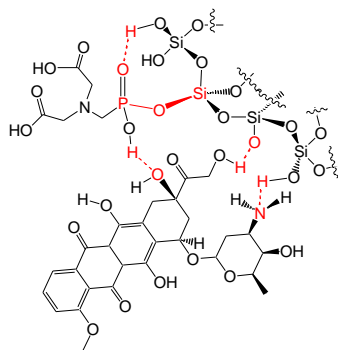

$E=-8053.168681839$

|    |              |               |              |
|----|--------------|---------------|--------------|
| Si | 0.669603000  | -0.889006000  | 3.669005000  |
| O  | 0.376470000  | -1.482802000  | 5.193781000  |
| Si | 0.885427000  | -2.661250000  | 6.220611000  |
| O  | 2.517683000  | -2.723652000  | 6.212965000  |
| Si | 4.072529000  | -2.281077000  | 6.553133000  |
| O  | 4.905057000  | -2.206341000  | 5.128452000  |
| Si | 3.294296000  | -6.619150000  | 6.739000000  |
| Si | 5.070484000  | -2.863688000  | 3.623654000  |
| Si | 3.150604000  | -5.276637000  | 3.851385000  |
| O  | 4.568160000  | -4.445354000  | 3.662967000  |
| O  | 2.921094000  | -5.687723000  | 5.421553000  |
| O  | 3.453543000  | -8.183722000  | 6.205508000  |
| Si | 2.578969000  | -9.099883000  | 5.125101000  |
| O  | 1.146837000  | -8.302433000  | 4.857741000  |
| Si | -0.083779000 | -7.689268000  | 3.947907000  |
| O  | 1.885545000  | -4.319455000  | 3.394662000  |
| Si | 1.149227000  | -3.587694000  | 2.114665000  |
| O  | 0.518314000  | -2.150039000  | 2.588866000  |
| O  | 0.213463000  | -4.105360000  | 5.888116000  |
| Si | -0.833661000 | -5.388219000  | 5.997370000  |
| O  | -0.717910000 | -6.338334000  | 4.651559000  |
| O  | 2.333581000  | -10.556238000 | 5.865632000  |
| H  | 1.893417000  | -11.245938000 | 5.340091000  |
| O  | -1.247775000 | -8.831944000  | 3.674546000  |
| H  | -1.680574000 | -9.222430000  | 4.452824000  |
| O  | 2.282267000  | -3.242653000  | 0.935171000  |
| H  | 2.511863000  | -3.939405000  | 0.294914000  |
| O  | 3.235140000  | -6.607504000  | 2.860141000  |
| H  | 2.345186000  | -6.918773000  | 2.553650000  |
| O  | 4.130190000  | -1.938274000  | 2.607589000  |
| H  | 3.748774000  | -2.364344000  | 1.804638000  |
| O  | 6.628333000  | -2.758849000  | 3.101246000  |
| H  | 7.303342000  | -3.241256000  | 3.609693000  |
| O  | 4.759688000  | -3.277630000  | 7.653920000  |
| H  | 4.810502000  | -4.251258000  | 7.504068000  |
| O  | 2.153896000  | -0.189405000  | 3.534508000  |
| H  | 2.906788000  | -0.735520000  | 3.206075000  |
| O  | -0.512890000 | 0.240025000   | 3.448387000  |
| H  | -0.452187000 | 0.775151000   | 2.638633000  |
| O  | -0.028259000 | -4.645770000  | 1.605884000  |
| H  | -0.591662000 | -4.382783000  | 0.855716000  |
| O  | 4.149624000  | -0.775076000  | 7.264892000  |
| H  | 4.087067000  | -0.004605000  | 6.672877000  |
| O  | -2.388043000 | -4.829149000  | 6.036467000  |
| H  | -2.482580000 | -3.965481000  | 6.506053000  |
| O  | -0.514109000 | -6.267703000  | 7.356937000  |
| H  | 0.443599000  | -6.409460000  | 7.582033000  |
| O  | 3.660489000  | -0.181911000  | 9.923077000  |
| H  | 3.979764000  | -0.375661000  | 9.009949000  |
| O  | 2.115726000  | 2.609328000   | 11.510469000 |
| O  | 1.159172000  | -0.636720000  | 10.575818000 |
| H  | 2.021461000  | -0.853873000  | 10.145840000 |
| C  | 2.208349000  | -0.388660000  | 12.795110000 |
| H  | 2.345826000  | 0.361192000   | 13.597287000 |
| C  | 0.076535000  | 0.772535000   | 12.159282000 |
| C  | -0.040310000 | -1.407443000  | 13.463994000 |

|   |              |              |              |
|---|--------------|--------------|--------------|
| O | 2.150177000  | -6.440473000 | 7.893770000  |
| H | 2.402384000  | -6.514234000 | 8.927165000  |
| O | 4.738656000  | -6.074921000 | 7.385378000  |
| H | 5.563527000  | -6.419747000 | 6.998133000  |
| O | 0.547837000  | -7.258937000 | 2.466480000  |
| H | 0.176139000  | -6.437376000 | 2.063202000  |
| O | 3.428886000  | -9.335642000 | 3.723600000  |
| H | 3.675113000  | -8.503490000 | 3.268358000  |
| P | -1.032896000 | -2.326173000 | 8.514020000  |
| C | -0.804276000 | -3.748311000 | 9.670586000  |
| H | -0.391988000 | -4.593125000 | 9.081711000  |
| H | -0.031934000 | -3.434463000 | 10.397656000 |
| N | -2.033737000 | -4.097460000 | 10.401250000 |
| C | -3.171181000 | -4.579613000 | 9.594800000  |
| C | -4.282347000 | -3.526244000 | 9.469040000  |
| O | -4.106058000 | -2.445899000 | 10.242089000 |
| H | -3.218764000 | -2.562601000 | 10.670270000 |
| O | -5.262628000 | -3.671745000 | 8.775443000  |
| H | -2.878023000 | -4.911028000 | 8.583939000  |
| H | -3.642155000 | -5.461077000 | 10.067047000 |
| C | -1.812450000 | -4.850290000 | 11.648428000 |
| C | -1.478938000 | -6.335885000 | 11.435341000 |
| O | -2.559251000 | -7.118757000 | 11.560532000 |
| H | -2.314724000 | -8.052423000 | 11.382580000 |
| O | -0.376318000 | -6.760080000 | 11.155741000 |
| H | -2.720054000 | -4.775266000 | 12.268241000 |
| H | -0.977089000 | -4.386933000 | 12.197729000 |
| O | -2.188144000 | -2.485059000 | 7.560374000  |
| O | -1.149884000 | -0.990822000 | 9.382808000  |
| H | -0.279880000 | -0.757197000 | 9.844085000  |
| O | 0.412958000  | -2.220175000 | 7.782958000  |
| O | 1.704990000  | -2.812622000 | 12.617957000 |
| O | 4.015169000  | -3.276351000 | 12.845230000 |
| O | 5.102209000  | -5.729432000 | 11.448896000 |
| O | -0.127310000 | -3.295434000 | 14.902082000 |
| H | -0.810017000 | -3.875072000 | 15.345412000 |
| O | -2.697709000 | 0.829697000  | 12.340154000 |
| H | -3.682876000 | 0.716155000  | 12.441922000 |
| O | -2.429720000 | -4.300698000 | 15.455614000 |
| O | -4.955926000 | -0.332548000 | 12.890072000 |
| O | -4.363428000 | -5.989574000 | 14.835556000 |
| N | 2.579849000  | -6.543009000 | 10.485193000 |
| C | 1.469991000  | -1.607663000 | 13.378059000 |
| H | 1.854576000  | -1.767917000 | 14.404906000 |
| C | 1.432037000  | 0.289228000  | 11.641518000 |
| C | 2.271284000  | 1.476194000  | 11.100654000 |
| C | 3.320566000  | 1.196126000  | 10.018970000 |
| H | 4.204167000  | 1.824803000  | 10.253056000 |
| H | 2.887884000  | 1.583310000  | 9.069357000  |
| C | -6.308746000 | -2.792707000 | 12.980192000 |
| C | -6.296491000 | -5.121360000 | 13.672224000 |
| C | -6.934283000 | -4.040862000 | 13.060062000 |
| C | -4.860298000 | -7.326023000 | 14.710326000 |
| H | 3.214465000  | -0.702395000 | 12.475126000 |
| H | -0.518127000 | 1.193075000  | 11.329625000 |
| H | 0.240715000  | 1.610082000  | 12.863642000 |
| H | 2.631795000  | -3.718144000 | 14.232855000 |



|   |              |              |              |   |              |              |              |
|---|--------------|--------------|--------------|---|--------------|--------------|--------------|
| C | -0.688255000 | -0.334131000 | 12.850813000 | H | 3.049111000  | -5.822787000 | 13.132811000 |
| C | 2.691169000  | -3.704701000 | 13.126537000 | H | 1.371155000  | -5.383231000 | 12.738219000 |
| C | 2.425404000  | -5.108205000 | 12.564322000 | H | 2.145142000  | -4.497182000 | 10.503879000 |
| C | 2.784555000  | -5.202079000 | 11.068489000 | H | 4.436525000  | -4.677670000 | 9.773361000  |
| C | 4.240421000  | -4.749521000 | 10.859195000 | H | 3.791320000  | -2.651643000 | 10.866534000 |
| C | 4.428620000  | -3.337354000 | 11.460616000 | H | 5.958004000  | -1.823257000 | 11.789817000 |
| C | -0.798610000 | -2.380206000 | 14.187794000 | H | 6.534865000  | -3.511036000 | 11.977103000 |
| C | -2.116484000 | -0.250835000 | 12.882154000 | H | 6.213675000  | -2.843114000 | 10.341086000 |
| C | -2.205323000 | -2.381409000 | 14.097892000 | H | 1.684279000  | -6.925179000 | 10.809363000 |
| C | -2.867415000 | -1.313358000 | 13.424131000 | H | 3.316485000  | -7.174464000 | 10.821963000 |
| C | 5.870935000  | -2.849895000 | 11.391862000 | H | 5.910464000  | -5.795784000 | 10.915690000 |
| C | -2.970594000 | -3.510360000 | 14.661882000 | H | -6.793839000 | -1.948456000 | 12.481687000 |
| C | -4.327004000 | -1.332140000 | 13.278286000 | H | -6.805502000 | -6.088169000 | 13.708474000 |
| C | -4.354448000 | -3.707133000 | 14.159066000 | H | -7.930069000 | -4.183918000 | 12.624099000 |
| C | -5.020416000 | -2.633778000 | 13.505478000 | H | -5.828710000 | -7.453383000 | 15.230288000 |
| C | -5.013681000 | -4.971666000 | 14.244376000 | H | -4.108977000 | -7.975397000 | 15.186254000 |
|   |              |              |              | H | -4.967585000 | -7.613843000 | 13.64715100  |

# SiO<sub>2</sub>-PMIDA-Dox salt 1

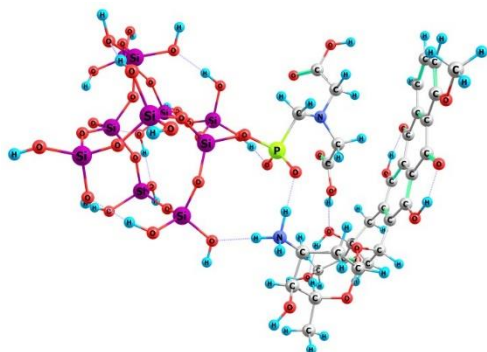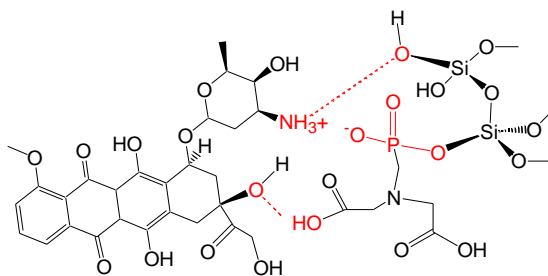

*E*=-8053.153077257

|    |              |               |              |
|----|--------------|---------------|--------------|
| Si | -1.542743000 | -4.664332000  | 4.313348000  |
| O  | 0.079993000  | -4.429684000  | 4.193595000  |
| Si | 1.624034000  | -4.998484000  | 4.299371000  |
| O  | 2.219562000  | -5.250661000  | 2.786703000  |
| Si | 1.899997000  | -5.026438000  | 1.180879000  |
| O  | 0.412881000  | -5.675764000  | 0.836354000  |
| Si | 3.668993000  | -8.832204000  | 2.250726000  |
| Si | -0.573198000 | -6.913950000  | 0.413410000  |
| Si | 0.512621000  | -8.869164000  | 2.472404000  |
| O  | 0.010192000  | -8.367049000  | 0.980872000  |
| O  | 2.112732000  | -8.523600000  | 2.670543000  |
| O  | 4.044579000  | -10.423133000 | 2.471948000  |
| Si | 3.526141000  | -11.581875000 | 3.550450000  |
| O  | 2.976714000  | -10.796354000 | 4.899565000  |
| Si | 1.853461000  | -10.358942000 | 6.026241000  |
| O  | -0.323439000 | -8.030284000  | 3.611944000  |
| Si | -1.728865000 | -7.784083000  | 4.427151000  |
| O  | -1.849523000 | -6.205909000  | 4.857986000  |
| O  | 1.658232000  | -6.375440000  | 5.183374000  |
| Si | 2.527060000  | -7.223909000  | 6.321672000  |
| O  | 1.922014000  | -8.763397000  | 6.374786000  |
| O  | 4.857239000  | -12.493459000 | 3.887656000  |
| H  | 4.760780000  | -13.211988000 | 4.535286000  |
| O  | 2.131823000  | -11.142836000 | 7.455545000  |
| H  | 2.100743000  | -12.114536000 | 7.443314000  |
| O  | -3.034883000 | -8.112586000  | 3.444540000  |
| H  | -3.289101000 | -9.045477000  | 3.325680000  |
| O  | 0.229128000  | -10.498241000 | 2.606252000  |
| H  | 0.134681000  | -10.769537000 | 3.556167000  |
| O  | -2.058251000 | -6.579599000  | 1.103442000  |
| H  | -2.543846000 | -7.281669000  | 1.586203000  |
| O  | -0.634572000 | -6.935464000  | -1.232912000 |
| H  | -1.249136000 | -7.556377000  | -1.660222000 |
| O  | 3.087072000  | -5.690310000  | 0.255937000  |
| H  | 3.285373000  | -6.651569000  | 0.302055000  |
| O  | -2.321980000 | -4.360559000  | 2.896984000  |
| H  | -2.276356000 | -5.047052000  | 2.191974000  |
| O  | -2.060425000 | -3.565221000  | 5.450126000  |
| H  | -3.021313000 | -3.465611000  | 5.573141000  |
| O  | -1.654102000 | -8.787955000  | 5.750165000  |
| H  | -2.389949000 | -8.798005000  | 6.387875000  |
| O  | 1.865688000  | -3.393845000  | 0.925446000  |
| H  | 1.579862000  | -3.086692000  | 0.048525000  |
| O  | 2.329351000  | -6.566623000  | 7.812073000  |
| H  | 2.121081000  | -5.585618000  | 7.773070000  |
| O  | 4.130543000  | -7.236442000  | 5.918584000  |
| H  | 4.346623000  | -7.475658000  | 4.989438000  |
| O  | -2.989147000 | -2.307903000  | 12.280937000 |
| H  | -3.578117000 | -2.986286000  | 11.906465000 |
| O  | -1.463240000 | -1.589429000  | 15.379995000 |
| O  | -0.299115000 | -2.216970000  | 12.105350000 |
| H  | -1.175667000 | -2.309874000  | 11.673296000 |
| C  | -0.846338000 | 0.132590000   | 12.752406000 |
| H  | -0.896387000 | 0.764142000   | 13.659993000 |

|   |              |               |              |
|---|--------------|---------------|--------------|
| H | 5.567832000  | -7.814077000  | 3.011396000  |
| O | 3.804713000  | -8.429864000  | 0.640872000  |
| H | 4.605887000  | -8.690937000  | 0.151438000  |
| O | 0.356151000  | -10.727976000 | 5.375756000  |
| H | -0.396417000 | -10.171688000 | 5.690406000  |
| O | 2.357806000  | -12.528026000 | 2.865094000  |
| H | 1.579933000  | -12.046970000 | 2.515881000  |
| P | 2.524579000  | -3.113254000  | 6.471416000  |
| C | 4.332965000  | -3.153428000  | 6.881871000  |
| H | 4.820313000  | -2.359745000  | 6.263708000  |
| H | 4.711009000  | -4.124947000  | 6.513252000  |
| N | 4.638622000  | -3.028379000  | 8.305982000  |
| C | 6.052667000  | -3.078708000  | 8.607651000  |
| C | 6.648264000  | -4.492293000  | 8.617796000  |
| O | 7.977085000  | -4.543807000  | 8.854593000  |
| H | 8.359734000  | -3.654350000  | 8.987979000  |
| O | 6.031270000  | -5.516577000  | 8.442567000  |
| H | 6.672194000  | -2.458852000  | 7.912009000  |
| H | 6.236891000  | -2.663723000  | 9.617624000  |
| C | 3.852891000  | -2.064197000  | 9.063197000  |
| C | 2.859130000  | -2.710665000  | 10.039164000 |
| O | 1.753818000  | -1.971518000  | 10.135813000 |
| H | 1.138618000  | -2.250400000  | 10.862853000 |
| O | 3.074466000  | -3.717103000  | 10.684384000 |
| H | 3.309190000  | -1.362803000  | 8.406211000  |
| H | 4.510855000  | -1.430402000  | 9.685606000  |
| O | 1.713727000  | -4.008983000  | 7.412355000  |
| O | 2.051354000  | -1.667114000  | 6.285290000  |
| H | 0.450244000  | -1.313339000  | 6.279426000  |
| O | 2.585740000  | -3.815983000  | 4.966584000  |
| O | -0.069448000 | 0.280127000   | 10.427929000 |
| O | -2.076788000 | 1.205655000   | 9.627435000  |
| O | -2.936604000 | 0.332248000   | 6.889238000  |
| O | 2.252730000  | 2.059978000   | 10.493295000 |
| H | 3.090539000  | 2.388708000   | 10.048622000 |
| O | 3.614165000  | -1.703350000  | 14.261452000 |
| H | 4.603526000  | -1.850733000  | 14.238535000 |
| O | 4.697193000  | 2.220199000   | 9.818948000  |
| O | 6.051640000  | -1.539153000  | 13.475474000 |
| O | 6.980846000  | 1.821443000   | 8.569902000  |
| N | -0.605620000 | -1.132114000  | 6.376141000  |
| H | -0.903142000 | -0.433862000  | 5.678336000  |
| C | 0.154738000  | 0.756476000   | 11.765277000 |
| H | 0.012446000  | 1.855910000   | 11.784527000 |
| C | -0.445200000 | -1.298141000  | 13.199600000 |
| C | -1.531253000 | -1.812078000  | 14.187493000 |
| C | -2.705060000 | -2.631604000  | 13.637769000 |
| H | -3.575065000 | -2.451387000  | 14.301249000 |
| H | -2.415648000 | -3.700368000  | 13.755937000 |
| C | 7.939318000  | -0.958041000  | 11.531909000 |
| C | 8.556966000  | 0.273150000   | 9.536450000  |
| C | 8.867163000  | -0.652494000  | 10.533201000 |
| C | 7.886317000  | 2.098201000   | 7.497050000  |
| H | -1.850347000 | 0.146770000   | 12.296732000 |
| H | 1.267725000  | -2.253877000  | 14.113459000 |
| H | 0.795776000  | -0.732664000  | 14.878589000 |

|   |              |              |              |   |              |              |              |
|---|--------------|--------------|--------------|---|--------------|--------------|--------------|
| C | 0.917377000  | -1.229631000 | 13.897537000 | H | -0.317775000 | 2.184148000  | 9.646283000  |
| C | 1.610308000  | 0.447549000  | 12.111665000 | H | -0.561653000 | 1.423140000  | 7.350800000  |
| C | 1.953263000  | -0.497815000 | 13.073235000 | H | 0.840893000  | 0.555743000  | 8.039824000  |
| C | -0.664980000 | 1.144603000  | 9.487723000  | H | -0.585957000 | -1.464837000 | 8.440479000  |
| C | -0.257044000 | 0.655862000  | 8.086582000  | H | -2.937932000 | -1.544330000 | 7.822942000  |
| C | -0.949622000 | -0.675192000 | 7.760347000  | H | -2.456980000 | -0.804829000 | 10.053888000 |
| C | -2.474577000 | -0.539175000 | 7.921314000  | H | -4.444173000 | 0.589106000  | 10.611846000 |
| C | -2.786847000 | -0.017389000 | 9.345691000  | H | -4.633790000 | 1.045577000  | 8.889261000  |
| C | 2.631741000  | 1.100424000  | 11.347694000 | H | -4.861707000 | -0.660605000 | 9.400981000  |
| C | 3.329519000  | -0.827389000 | 13.287951000 | H | -1.094701000 | -2.020021000 | 6.129243000  |
| C | 3.979818000  | 0.701265000  | 11.475296000 | H | -3.864946000 | 0.125337000  | 6.691774000  |
| C | 4.327023000  | -0.277999000 | 12.455764000 | H | 8.169514000  | -1.691210000 | 12.310071000 |
| C | -4.269891000 | 0.257152000  | 9.572949000  | H | 9.298825000  | 0.486720000  | 8.762725000  |
| C | 4.995424000  | 1.266601000  | 10.565271000 | H | 9.847046000  | -1.144647000 | 10.523139000 |
| C | 5.704982000  | -0.753468000 | 12.570763000 | H | 8.832454000  | 2.538850000  | 7.866430000  |
| C | 6.341300000  | 0.631480000  | 10.537091000 | H | 7.374969000  | 2.829584000  | 6.850995000  |
| C | 6.685388000  | -0.332114000 | 11.528003000 | H | 8.109946000  | 1.186723000  | 6.909859000  |
| C | 7.305641000  | 0.930240000  | 9.521484000  |   |              |              |              |
| O | 4.616267000  | -7.861644000 | 3.216716000  |   |              |              |              |

## SiO<sub>2</sub>-PMIDA-Dox salt 2

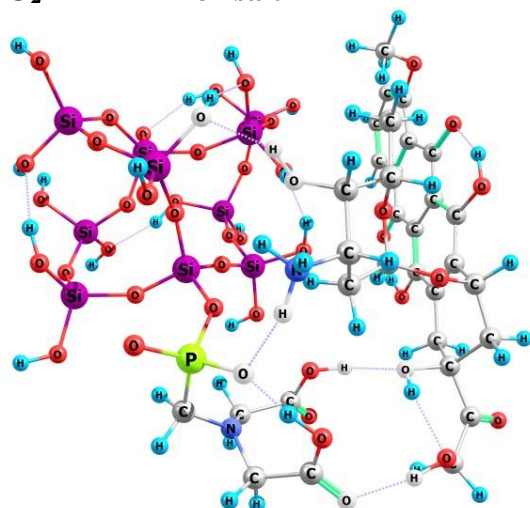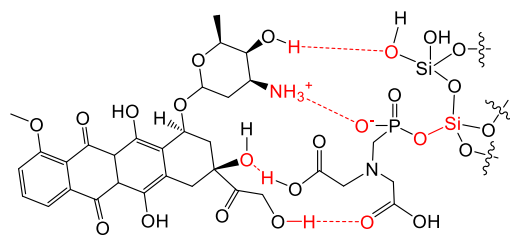

**E=-8053.169980512**

|    |              |               |              |
|----|--------------|---------------|--------------|
| Si | 0.383497000  | -7.245139000  | 4.852072000  |
| O  | 0.605149000  | -6.503038000  | 6.304523000  |
| Si | 1.350628000  | -5.332394000  | 7.184649000  |
| O  | 2.589620000  | -4.650102000  | 6.339695000  |
| Si | 3.280539000  | -3.645252000  | 5.234858000  |
| O  | 3.827357000  | -4.552881000  | 3.964880000  |
| Si | 5.732348000  | -5.030827000  | 8.442490000  |
| Si | 4.681156000  | -5.877216000  | 3.495532000  |
| Si | 5.069345000  | -7.287126000  | 6.219051000  |
| O  | 5.467130000  | -6.582523000  | 4.779539000  |
| O  | 5.132044000  | -6.182707000  | 7.424920000  |
| O  | 6.713400000  | -5.767026000  | 9.538764000  |
| Si | 7.308206000  | -7.299837000  | 9.796785000  |
| O  | 6.059956000  | -8.321779000  | 10.159448000 |
| Si | 4.580320000  | -8.991166000  | 9.880460000  |
| O  | 3.532711000  | -7.890200000  | 6.131722000  |
| Si | 2.741584000  | -9.148997000  | 5.405476000  |
| O  | 1.256909000  | -8.669261000  | 4.900459000  |
| O  | 1.901061000  | -5.981620000  | 8.572271000  |
| Si | 2.293701000  | -6.699786000  | 9.999332000  |
| O  | 3.429226000  | -7.851192000  | 9.654246000  |
| O  | 8.317830000  | -7.123436000  | 11.086081000 |
| H  | 8.632090000  | -7.921300000  | 11.542614000 |
| O  | 4.104253000  | -9.904747000  | 11.172124000 |
| H  | 4.682631000  | -10.638785000 | 11.440738000 |
| O  | 3.536243000  | -9.622263000  | 4.018219000  |
| H  | 4.349581000  | -10.151038000 | 4.105470000  |
| O  | 6.162192000  | -8.511463000  | 6.492596000  |
| H  | 5.817310000  | -9.185606000  | 7.132220000  |
| O  | 3.569066000  | -6.943055000  | 2.850417000  |
| H  | 3.729296000  | -7.908083000  | 2.941354000  |
| O  | 5.777925000  | -5.328318000  | 2.395442000  |
| H  | 6.319443000  | -5.983629000  | 1.923234000  |
| O  | 4.534805000  | -2.767126000  | 5.877789000  |
| H  | 5.345569000  | -3.194102000  | 6.237543000  |
| O  | 0.857995000  | -6.337212000  | 3.560166000  |
| H  | 1.756207000  | -6.510093000  | 3.197088000  |
| O  | -1.233443000 | -7.570214000  | 4.778757000  |
| H  | -1.590970000 | -7.854094000  | 3.920318000  |
| O  | 2.681036000  | -10.329260000 | 6.575127000  |
| H  | 2.236856000  | -11.173535000 | 6.378660000  |
| O  | 2.133583000  | -2.564640000  | 4.744486000  |
| H  | 2.417127000  | -1.832658000  | 4.170029000  |
| O  | 0.986034000  | -7.407274000  | 10.730168000 |
| H  | 0.630195000  | -8.211270000  | 10.315497000 |
| O  | 2.850601000  | -5.594169000  | 11.092451000 |
| H  | 3.506512000  | -4.977987000  | 10.695121000 |
| O  | -2.922605000 | -1.414072000  | 13.328648000 |

|   |              |               |              |
|---|--------------|---------------|--------------|
| C | 2.851425000  | -4.609511000  | 14.826468000 |
| C | 4.838735000  | -3.306292000  | 14.191343000 |
| C | 4.239331000  | -4.542130000  | 14.589123000 |
| C | 5.270140000  | -0.840102000  | 10.244652000 |
| C | 6.282785000  | -3.204155000  | 13.935982000 |
| C | 5.064300000  | -5.734677000  | 14.791639000 |
| C | 7.106124000  | -4.445232000  | 14.005073000 |
| C | 6.523026000  | -5.646384000  | 14.502110000 |
| C | 8.490646000  | -4.464528000  | 13.673627000 |
| O | 4.555931000  | -4.261856000  | 9.293840000  |
| H | 4.078327000  | -3.466811000  | 8.939348000  |
| O | 6.538158000  | -3.881964000  | 7.536164000  |
| H | 7.376740000  | -4.140393000  | 7.111838000  |
| O | 4.769477000  | -9.888667000  | 8.482114000  |
| H | 3.960238000  | -10.192467000 | 8.008982000  |
| O | 8.167289000  | -7.829280000  | 8.488977000  |
| H | 7.660336000  | -8.081061000  | 7.687500000  |
| P | -1.228270000 | -3.705419000  | 6.917731000  |
| C | -2.433388000 | -4.986491000  | 7.504507000  |
| H | -2.040327000 | -5.974144000  | 7.198682000  |
| H | -3.353785000 | -4.827523000  | 6.904169000  |
| N | -2.715351000 | -4.947784000  | 8.930571000  |
| C | -3.898651000 | -4.242766000  | 9.386687000  |
| C | -3.624859000 | -3.021944000  | 10.293536000 |
| O | -2.778929000 | -2.109017000  | 9.871944000  |
| H | -2.317279000 | -2.307373000  | 8.967433000  |
| O | -4.210532000 | -2.889939000  | 11.367139000 |
| H | -4.468630000 | -3.863673000  | 8.514643000  |
| H | -4.581104000 | -4.909724000  | 9.953371000  |
| C | -2.259227000 | -6.039563000  | 9.770874000  |
| C | -1.723670000 | -5.584318000  | 11.136114000 |
| O | -0.885051000 | -4.555245000  | 11.026495000 |
| H | -0.683059000 | -4.148292000  | 11.913847000 |
| O | -2.036065000 | -6.099652000  | 12.193264000 |
| H | -1.422424000 | -6.562543000  | 9.271897000  |
| H | -3.052722000 | -6.793887000  | 9.973295000  |
| O | -1.151992000 | -3.691628000  | 5.409217000  |
| O | -1.533580000 | -2.368337000  | 7.658478000  |
| H | -0.160879000 | -1.348922000  | 7.927641000  |
| O | 0.225885000  | -4.179659000  | 7.583109000  |
| O | 1.575901000  | -0.935935000  | 12.320810000 |
| O | 3.323784000  | -1.945721000  | 11.123253000 |
| O | 3.347463000  | -1.982054000  | 8.251383000  |
| O | 4.529832000  | -0.956717000  | 13.763888000 |
| H | 5.524368000  | -1.075344000  | 13.698030000 |
| O | 2.249424000  | -5.725956000  | 15.256796000 |
| H | 2.961367000  | -6.424149000  | 15.343803000 |
| O | 6.797180000  | -2.095425000  | 13.678471000 |
| O | 4.568917000  | -6.808668000  | 15.188038000 |
| O | 9.146631000  | -3.397572000  | 13.132001000 |

|   |              |              |              |   |              |              |              |
|---|--------------|--------------|--------------|---|--------------|--------------|--------------|
| H | -3.486011000 | -1.784360000 | 12.602450000 | N | 0.803728000  | -0.894988000 | 7.898599000  |
| O | -1.640371000 | -2.479387000 | 16.403147000 | H | 1.358643000  | -1.496693000 | 7.265116000  |
| O | -0.633480000 | -2.794537000 | 12.994983000 | C | 1.736692000  | -1.084696000 | 13.763242000 |
| H | -1.297375000 | -2.141904000 | 12.676174000 | H | 2.252815000  | -0.162642000 | 14.084460000 |
| C | 0.367418000  | -1.110167000 | 14.459020000 | C | -0.346975000 | -2.479833000 | 14.359334000 |
| H | 0.516888000  | -0.866663000 | 15.528206000 | C | -1.665655000 | -2.414338000 | 15.189783000 |
| C | 0.549508000  | -3.600812000 | 14.907042000 | C | -2.999800000 | -2.294988000 | 14.441874000 |
| C | 2.599133000  | -2.275414000 | 14.155116000 | H | -3.761413000 | -1.967697000 | 15.179131000 |
| C | 2.023079000  | -3.463788000 | 14.594336000 | H | -3.266999000 | -3.329581000 | 14.129302000 |
| C | 1.937639000  | -1.983453000 | 11.442648000 | C | 7.302809000  | -6.791397000 | 14.722347000 |
| C | 1.075376000  | -1.920542000 | 10.167602000 | C | 9.256292000  | -5.617009000 | 13.921817000 |
| C | 1.503531000  | -0.783069000 | 9.231106000  | C | 8.673581000  | -6.768230000 | 14.454531000 |
| C | 3.030889000  | -0.800827000 | 8.999499000  | C | 8.913616000  | -3.153559000 | 11.734628000 |
| C | 3.749026000  | -0.801828000 | 10.364677000 | H | -0.270704000 | -0.315804000 | 14.030291000 |
| C | 4.022378000  | -2.164050000 | 14.029994000 | H | 0.167497000  | -4.571268000 | 14.541749000 |
| H | 5.725747000  | -0.867202000 | 11.247915000 | H | 0.444797000  | -3.629004000 | 16.009043000 |
| H | 5.613026000  | -1.726909000 | 9.685939000  | H | 1.791504000  | -2.968407000 | 11.913691000 |
| H | 5.631241000  | 0.063567000  | 9.720956000  | H | 1.186871000  | -2.888055000 | 9.648838000  |
| H | 0.711355000  | 0.022452000  | 7.438143000  | H | 0.013178000  | -1.819939000 | 10.441692000 |
| H | 3.886448000  | -1.796107000 | 7.453243000  | H | 1.217021000  | 0.192935000  | 9.659161000  |
| H | 6.821125000  | -7.694382000 | 15.109405000 | H | 3.333137000  | 0.100059000  | 8.430020000  |
| H | 10.322676000 | -5.588578000 | 13.670079000 | H | 3.453687000  | 0.126420000  | 10.897273000 |
| H | 9.287300000  | -7.657935000 | 14.639263000 | H | 9.525115000  | -2.278708000 | 11.458062000 |
| H | 9.227202000  | -4.027087000 | 11.130119000 | H | 7.851143000  | -2.931474000 | 11.524417000 |

# SiO<sub>2</sub>-PMIDA-Dox salt 3

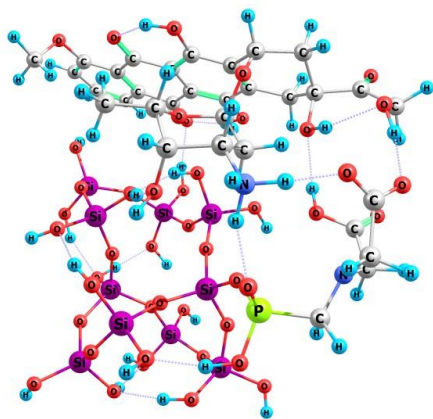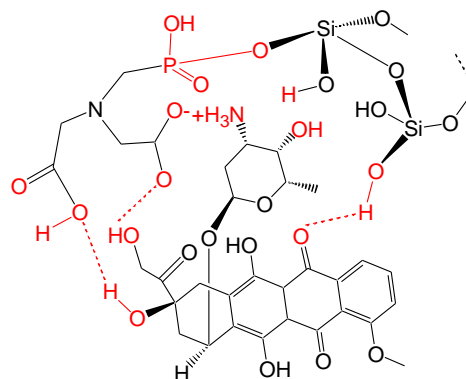

$E = -8053.168327294$

|    |              |              |              |
|----|--------------|--------------|--------------|
| Si | 4.070740000  | -5.156226000 | 6.316634000  |
| O  | 4.137348000  | -4.139568000 | 7.618322000  |
| Si | 4.891449000  | -2.865781000 | 8.320246000  |
| O  | 6.075858000  | -2.277269000 | 7.342952000  |
| Si | 6.732878000  | -1.367856000 | 6.137756000  |
| O  | 7.663275000  | -2.334523000 | 5.181772000  |
| Si | 9.199391000  | -1.994977000 | 9.421734000  |
| Si | 8.458098000  | -3.734429000 | 4.855762000  |
| Si | 8.754397000  | -4.714288000 | 7.741468000  |
| O  | 9.226945000  | -4.288813000 | 6.219474000  |
| O  | 8.681769000  | -3.384092000 | 8.693669000  |
| O  | 10.341121000 | -2.434750000 | 10.526999000 |
| Si | 10.762656000 | -3.891995000 | 11.218115000 |
| O  | 9.368625000  | -4.684237000 | 11.626306000 |
| Si | 8.171966000  | -5.817779000 | 11.620225000 |
| O  | 7.243351000  | -5.389323000 | 7.703965000  |
| Si | 6.544432000  | -6.792495000 | 7.172098000  |
| O  | 5.007106000  | -6.487499000 | 6.688687000  |
| O  | 5.446181000  | -3.264878000 | 9.790540000  |
| Si | 5.791887000  | -3.751908000 | 11.334667000 |
| O  | 6.721592000  | -5.121924000 | 11.243616000 |
| O  | 11.649453000 | -3.459758000 | 12.537883000 |
| H  | 11.987783000 | -4.170036000 | 13.108338000 |
| O  | 8.129924000  | -6.625230000 | 13.055071000 |
| H  | 8.088885000  | -6.091613000 | 13.878668000 |
| O  | 7.335848000  | -7.361817000 | 5.819926000  |
| H  | 8.165062000  | -7.859335000 | 5.937421000  |
| O  | 9.865929000  | -5.813265000 | 8.302482000  |
| H  | 9.515666000  | -6.373838000 | 9.044153000  |
| O  | 7.328488000  | -4.856969000 | 4.349704000  |
| H  | 7.492987000  | -5.802866000 | 4.564576000  |
| O  | 9.561878000  | -3.360537000 | 3.693949000  |
| H  | 10.037075000 | -4.090772000 | 3.261895000  |
| O  | 7.589660000  | -0.081467000 | 6.702893000  |
| H  | 8.445317000  | -0.256714000 | 7.159052000  |
| O  | 4.577713000  | -4.461615000 | 4.912365000  |
| H  | 5.512564000  | -4.579010000 | 4.625296000  |
| O  | 2.480116000  | -5.578119000 | 6.213563000  |
| H  | 2.202770000  | -6.080781000 | 5.428873000  |
| O  | 6.618141000  | -7.829027000 | 8.467613000  |
| H  | 6.220244000  | -8.715467000 | 8.393893000  |
| O  | 5.452147000  | -0.764888000 | 5.253227000  |
| H  | 5.621093000  | -0.043389000 | 4.620268000  |
| O  | 4.411498000  | -4.078685000 | 12.187490000 |
| H  | 3.907604000  | -4.874343000 | 11.947255000 |
| O  | 6.556568000  | -2.563088000 | 12.171571000 |
| H  | 7.093038000  | -1.941367000 | 11.625904000 |
| O  | 0.729841000  | 0.764336000  | 14.236244000 |
| H  | 0.269653000  | 0.728590000  | 13.338534000 |
| O  | 1.303321000  | -1.431451000 | 16.952668000 |
| O  | 2.846066000  | -0.854157000 | 13.849425000 |
| H  | 2.260934000  | -0.105132000 | 13.591518000 |

|   |              |              |              |
|---|--------------|--------------|--------------|
| N | 0.694037000  | -0.948694000 | 9.284107000  |
| C | 0.177161000  | 0.420782000  | 9.422539000  |
| C | 0.433118000  | 1.017830000  | 10.832619000 |
| O | 1.297280000  | 1.928238000  | 10.957661000 |
| O | -0.261911000 | 0.537553000  | 11.774967000 |
| H | 0.678821000  | 1.055068000  | 8.675267000  |
| H | -0.921691000 | 0.457383000  | 9.222403000  |
| C | 0.030634000  | -1.972467000 | 10.076480000 |
| C | 0.633310000  | -2.237554000 | 11.460178000 |
| O | 1.938227000  | -1.965694000 | 11.526158000 |
| H | 2.264274000  | -2.027081000 | 12.457867000 |
| O | -0.008434000 | -2.714679000 | 12.378435000 |
| H | 0.077555000  | -2.943397000 | 9.544018000  |
| H | -1.046469000 | -1.758288000 | 10.238896000 |
| O | 2.964569000  | -1.414743000 | 6.048415000  |
| H | 3.817581000  | -1.145339000 | 5.604141000  |
| H | 2.758595000  | 2.261467000  | 10.129144000 |
| O | 3.748444000  | -1.654963000 | 8.525893000  |
| O | 5.007401000  | 1.305938000  | 13.885908000 |
| O | 6.678235000  | 0.633728000  | 12.383735000 |
| O | 6.462508000  | 1.012537000  | 9.550685000  |
| O | 7.767073000  | 0.956694000  | 15.357459000 |
| H | 8.768535000  | 0.883169000  | 15.340557000 |
| O | 5.579826000  | -4.075977000 | 15.638581000 |
| H | 6.302143000  | -4.764291000 | 15.579958000 |
| O | 10.082078000 | -0.073183000 | 15.325731000 |
| O | 7.931869000  | -5.061781000 | 15.428488000 |
| O | 12.552963000 | -1.136933000 | 15.653297000 |
| N | 3.760821000  | 2.324667000  | 9.770285000  |
| H | 3.809991000  | 1.613814000  | 8.998593000  |
| C | 4.998848000  | 0.772641000  | 15.236588000 |
| H | 5.435700000  | 1.583012000  | 15.847622000 |
| C | 2.941022000  | -0.792370000 | 15.275304000 |
| C | 1.509201000  | -0.901084000 | 15.878191000 |
| C | 0.342544000  | -0.325257000 | 15.055111000 |
| H | -0.451503000 | -0.044192000 | 15.779140000 |
| H | -0.051704000 | -1.178014000 | 14.457650000 |
| C | 10.692366000 | -4.877678000 | 15.603461000 |
| C | 12.672983000 | -3.497953000 | 15.729934000 |
| C | 12.080478000 | -4.763337000 | 15.719876000 |
| C | 12.978456000 | -0.601220000 | 14.389577000 |
| H | 2.936657000  | 1.396868000  | 15.427424000 |
| H | 3.523695000  | -2.869260000 | 15.157830000 |
| H | 3.625195000  | -2.183336000 | 16.781252000 |
| H | 5.232198000  | -0.586317000 | 13.039429000 |
| H | 4.409350000  | -0.054878000 | 10.897118000 |
| H | 3.330654000  | 0.838255000  | 11.992429000 |
| H | 4.572827000  | 2.941248000  | 11.590598000 |
| H | 6.469570000  | 3.053531000  | 10.020769000 |
| H | 6.739033000  | 2.717776000  | 12.458140000 |
| H | 9.039765000  | 1.746117000  | 12.537059000 |
| H | 8.870994000  | 1.161707000  | 10.854774000 |
| H | 8.840630000  | 2.919810000  | 11.197426000 |

|   |              |              |              |   |              |              |              |
|---|--------------|--------------|--------------|---|--------------|--------------|--------------|
| C | 3.565002000  | 0.546478000  | 15.743262000 | H | 3.896309000  | 3.252659000  | 9.343084000  |
| H | 3.585330000  | 0.549045000  | 16.850483000 | H | 6.618774000  | 1.357802000  | 8.654122000  |
| C | 3.824399000  | -1.964052000 | 15.714027000 | H | 10.212219000 | -5.860456000 | 15.596512000 |
| C | 5.871095000  | -0.462613000 | 15.405067000 | H | 13.759209000 | -3.386315000 | 15.827588000 |
| C | 5.311512000  | -1.728164000 | 15.549166000 | H | 12.702829000 | -5.661801000 | 15.805980000 |
| C | 5.320298000  | 0.476911000  | 12.777606000 | H | 13.665102000 | -1.301303000 | 13.874188000 |
| C | 4.360480000  | 0.782854000  | 11.615864000 | H | 13.511397000 | 0.339368000  | 14.606422000 |
| C | 4.714702000  | 2.088862000  | 10.901522000 | H | 12.115732000 | -0.388336000 | 13.731661000 |
| C | 6.196820000  | 2.081421000  | 10.476560000 | C | 9.896167000  | -3.725118000 | 15.512750000 |
| C | 7.020992000  | 1.889441000  | 11.774495000 | C | 11.895665000 | -2.331066000 | 15.611256000 |
| C | 7.296571000  | -0.292546000 | 15.389588000 | O | 7.971297000  | -1.238611000 | 10.206603000 |
| C | 6.168457000  | -2.878103000 | 15.564837000 | H | 7.471284000  | -0.444551000 | 9.883331000  |
| C | 8.147943000  | -1.417937000 | 15.434431000 | O | 9.789756000  | -0.923203000 | 8.288137000  |
| C | 7.570424000  | -2.726444000 | 15.494586000 | H | 10.581327000 | -1.173398000 | 7.777566000  |
| C | 8.533200000  | 1.926889000  | 11.572337000 | O | 8.518276000  | -6.934887000 | 10.426064000 |
| C | 9.604855000  | -1.223504000 | 15.411630000 | H | 7.762824000  | -7.360920000 | 9.958798000  |
| C | 8.422999000  | -3.904562000 | 15.467738000 | O | 11.714953000 | -4.800952000 | 10.221467000 |
| C | 10.481456000 | -2.426512000 | 15.502540000 | H | 11.286182000 | -5.184515000 | 9.426225000  |
|   |              |              |              | P | 2.788347000  | -0.796993000 | 7.529907000  |
|   |              |              |              | O | 3.106201000  | 0.673823000  | 7.636547000  |
|   |              |              |              | C | 1.075286000  | -1.315255000 | 7.932040000  |
|   |              |              |              | H | 1.061176000  | -2.412919000 | 7.804020000  |
|   |              |              |              | H | 0.412902000  | -0.893411000 | 7.141046000  |

## Energy Parameters in Water

**Table S1.** Total energies  $E$  of the optimized complexes of Dox and corresponding sums of Dox and SiO<sub>2</sub> conjugates energies

| Structure                                                   | Energy Type                      | Energy/Hartree         |
|-------------------------------------------------------------|----------------------------------|------------------------|
|                                                             | $E_{\text{Dox}} + E_{\text{cl}}$ |                        |
| Dox + SiO <sub>2</sub> cluster                              |                                  | -7011.228829143        |
| Dox + APS-SiO <sub>2</sub> cluster                          |                                  | -7109.085273875        |
| Dox + 2APS-SiO <sub>2</sub> cluster                         |                                  | -7206.943132945        |
| Dox + SiO <sub>2</sub> -PMIDA cluster A                     |                                  | -7976.739817550        |
| Dox + SiO <sub>2</sub> -PMIDA cluster B                     |                                  | -8053.084328530        |
| Dox + PMIDA-SiO <sub>2</sub> cluster (A) + H <sub>2</sub> O |                                  | -8053.060162210        |
| PMIDA-Dox (with one free P(O)-OH)                           |                                  | -3044.139790198        |
| PMIDA-Dox salt A                                            |                                  | -3044.156612084        |
| PMIDA-Dox salt B                                            |                                  | -3044.146658006        |
|                                                             |                                  |                        |
|                                                             | $E_{\text{c}}$                   |                        |
| SiO <sub>2</sub> -Dox complex 1                             |                                  | -7011.299827736        |
| SiO <sub>2</sub> -Dox complex 2                             |                                  | -7011.288183504        |
| SiO <sub>2</sub> -Dox complex 3                             |                                  | -7011.290569604        |
| SiO <sub>2</sub> -APS-Dox complex 1                         |                                  | -7109.111443578        |
| SiO <sub>2</sub> -APS-Dox complex 2                         |                                  | -7109.113112645        |
| SiO <sub>2</sub> -2APS-Dox complex 1                        |                                  | -7206.966864318        |
| SiO <sub>2</sub> -2APS-Dox complex 2                        |                                  | -7206.970503408        |
| SiO <sub>2</sub> -PMIDA-Dox complex 1                       |                                  | -7976.76317997         |
| SiO <sub>2</sub> -PMIDA-Dox complex 2                       |                                  | -7976.794151513        |
| SiO <sub>2</sub> -PMIDA-Dox complex 3                       |                                  | -7976.782308837        |
| SiO <sub>2</sub> -PMIDA-Dox complex 4                       |                                  | -8053.168681839        |
| SiO <sub>2</sub> -PMIDA-Dox complex 3 + H <sub>2</sub> O    |                                  | -8053.102653490        |
| SiO <sub>2</sub> -PMIDA-Dox salt 1                          |                                  | -8053.153077257        |
| <b>SiO<sub>2</sub>-PMIDA-Dox salt 2</b>                     |                                  | <b>-8053.169980512</b> |
| SiO <sub>2</sub> -PMIDA-Dox salt 3                          |                                  | -8053.168327294        |



**Table S2.** Binding energies  $E_b$  for the optimized complexes of Dox

| Structure                                                               | $E_b$ (kJ/mol) <sup>1</sup> |
|-------------------------------------------------------------------------|-----------------------------|
| SiO <sub>2</sub> -Dox complex 1                                         | -186.41                     |
| SiO <sub>2</sub> -Dox complex 2                                         | -155.84                     |
| SiO <sub>2</sub> -Dox complex 3                                         | -162.09                     |
| SiO <sub>2</sub> -APS-Dox complex 1                                     | -68.71                      |
| SiO <sub>2</sub> -APS-Dox complex 2                                     | -73.09                      |
| SiO <sub>2</sub> -2APS-Dox complex 1                                    | -62.31                      |
| SiO <sub>2</sub> -2APS-Dox complex 2                                    | -71.86                      |
| SiO <sub>2</sub> -PMIDA-Dox complex 1                                   | -61.34                      |
| SiO <sub>2</sub> -PMIDA-Dox complex 2                                   | -142.65                     |
| SiO <sub>2</sub> -PMIDA-Dox complex 3                                   | -111.56                     |
| SiO <sub>2</sub> -PMIDA-Dox complex 4                                   | -221.46                     |
| (from SiO <sub>2</sub> -PMIDA with one free P(O)-OH, cluster <b>B</b> ) |                             |
| PMIDA-Dox (with one free P(O)-OH)                                       | -143.88                     |
| SiO <sub>2</sub> -PMIDA-Dox salt 1                                      | -180.50                     |
| <b>SiO<sub>2</sub>-PMIDA-Dox salt 2</b>                                 | <b>-224.88</b>              |
| SiO <sub>2</sub> -PMIDA-Dox salt 3                                      | -220.54                     |
| PMIDA-Dox salt A                                                        | -188.49                     |
| PMIDA-Dox salt B                                                        | -161.92                     |

Assessment of Cytotoxicity of NCs and Microscopic Examination *In Vitro*

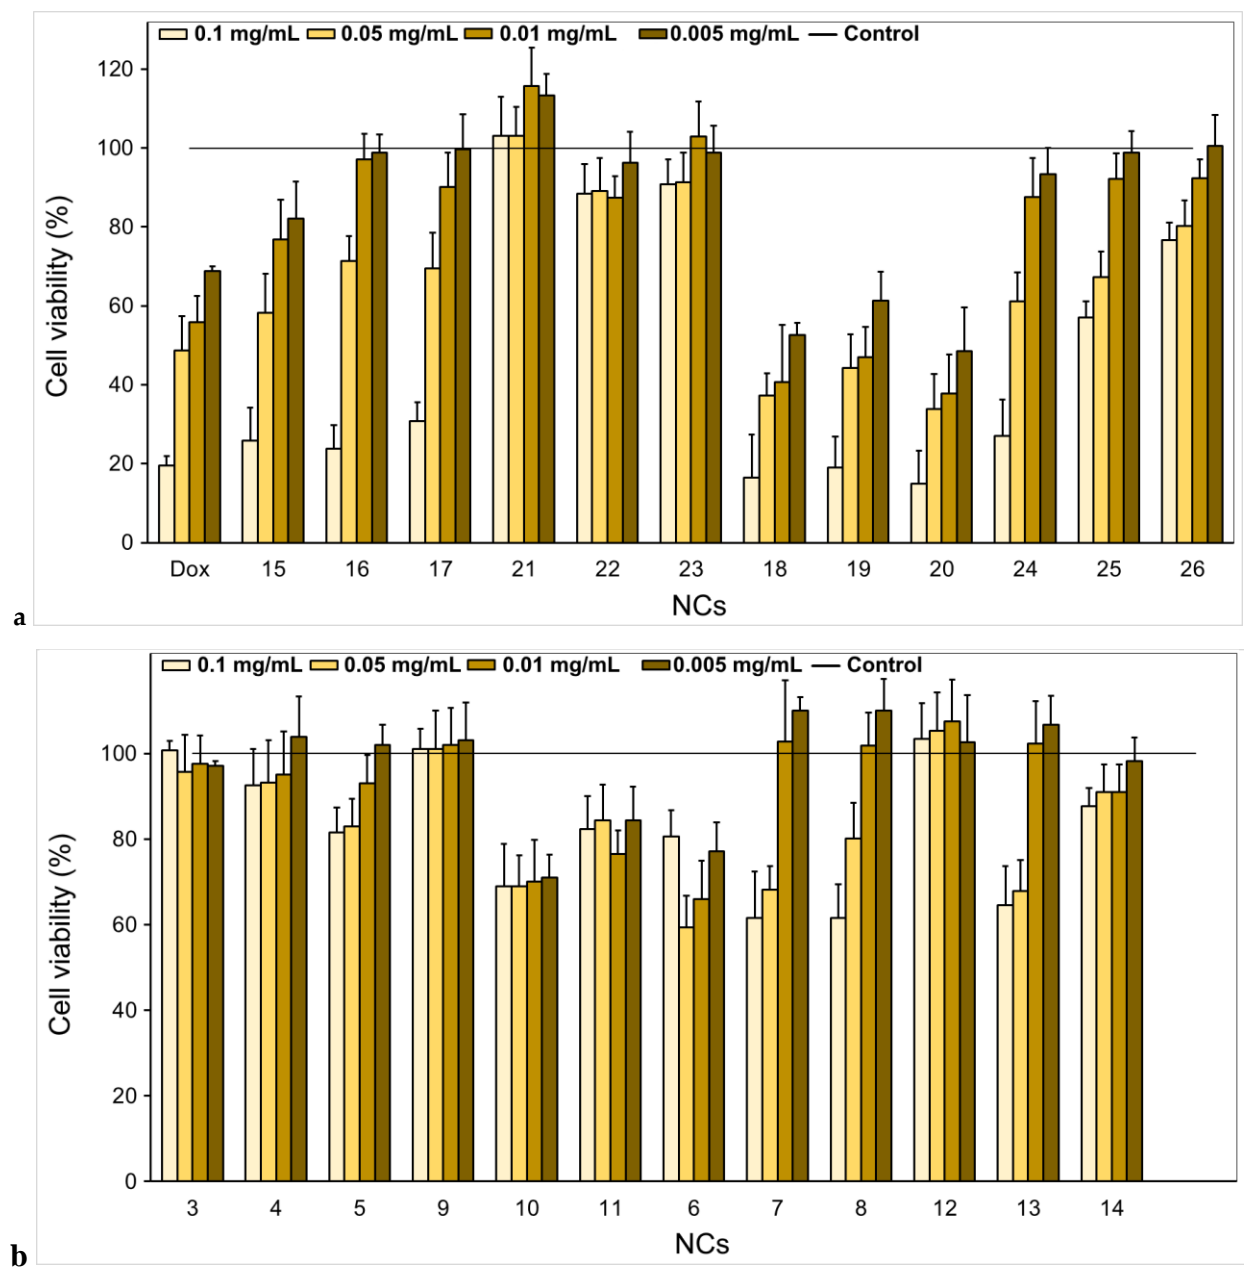

**Figure S7.** Viability of HEK-293 cells after 48-h incubation with (a) Dox-loaded NCs **15-26** and (b) NCs **3-14** (MTT assay).



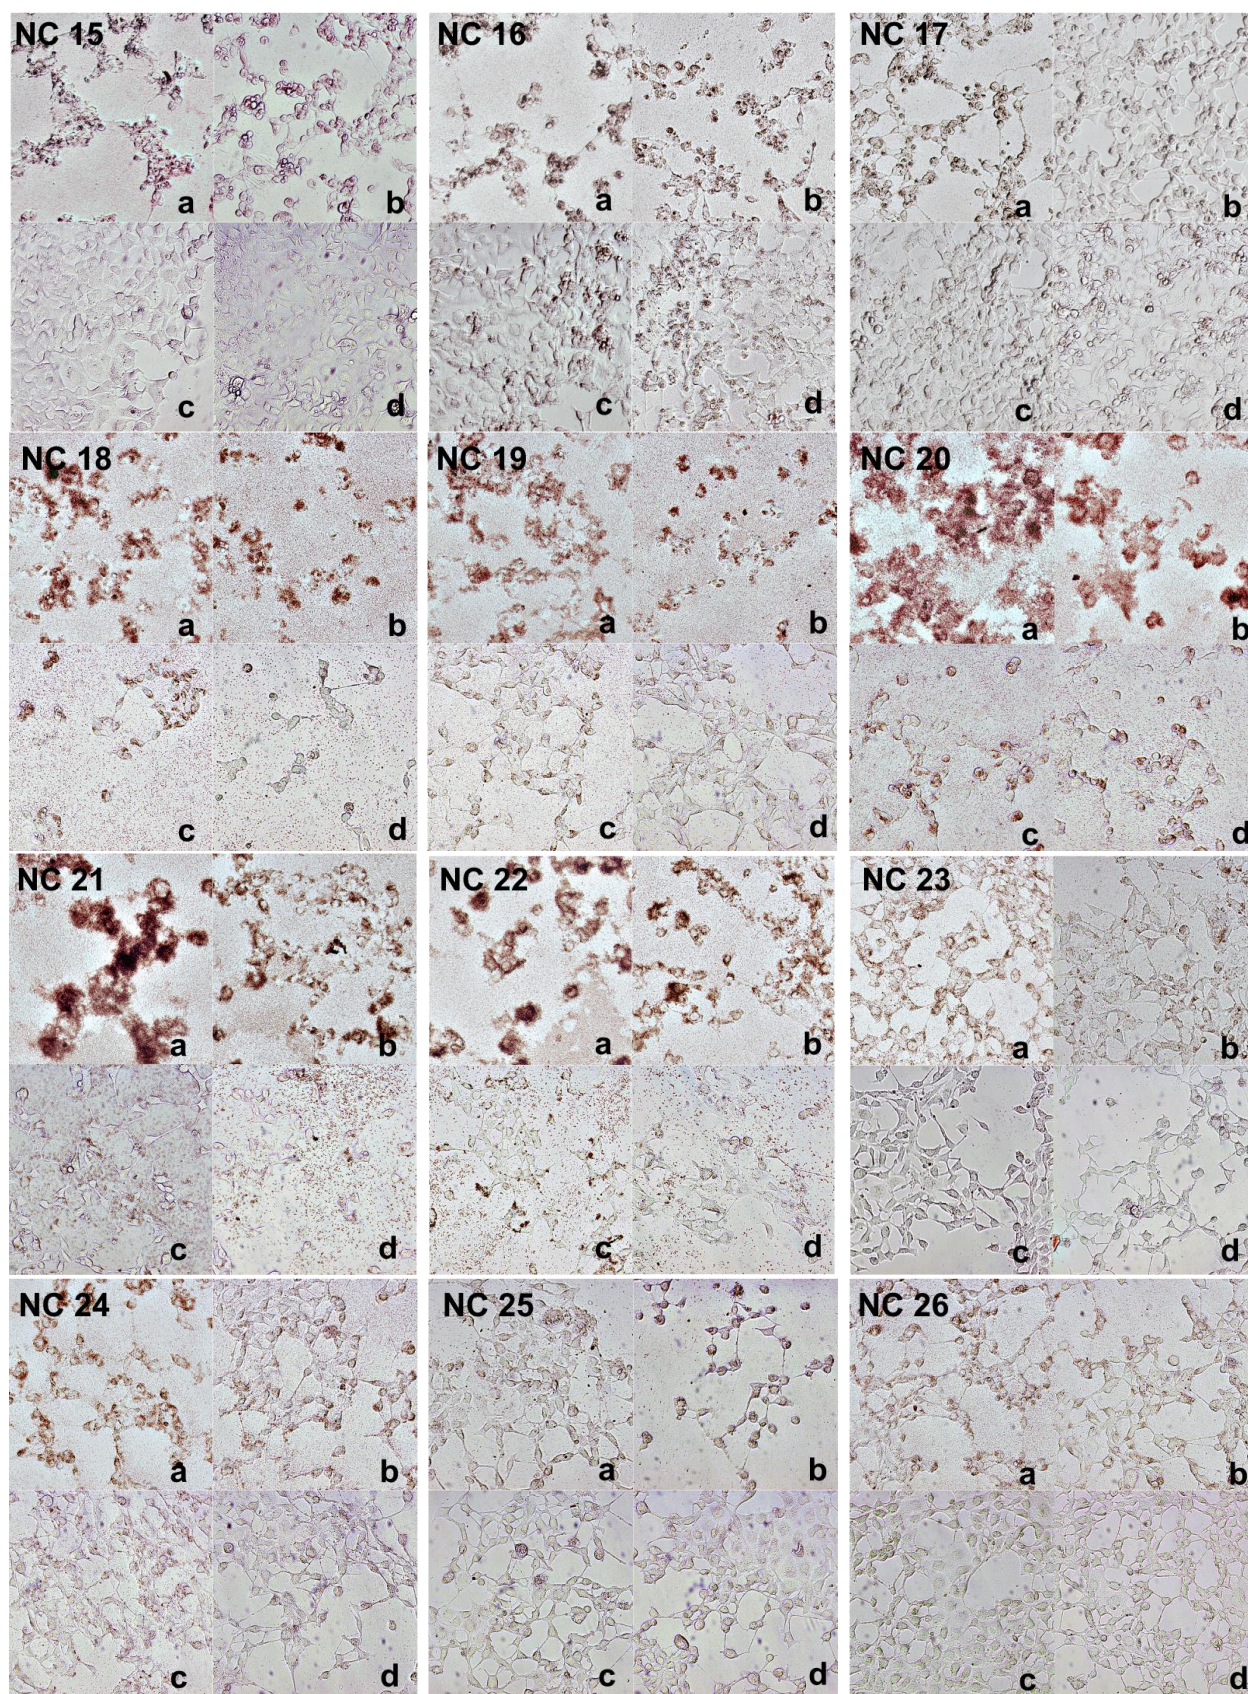

**Figure S8.** Optical microscope images (x200) of HEK-293 cells incubated with NCs 15–26 at concentrations of (a) 0.1, (b) 0.05, (c) 0.01, and (d) 0.005 mg/mL.



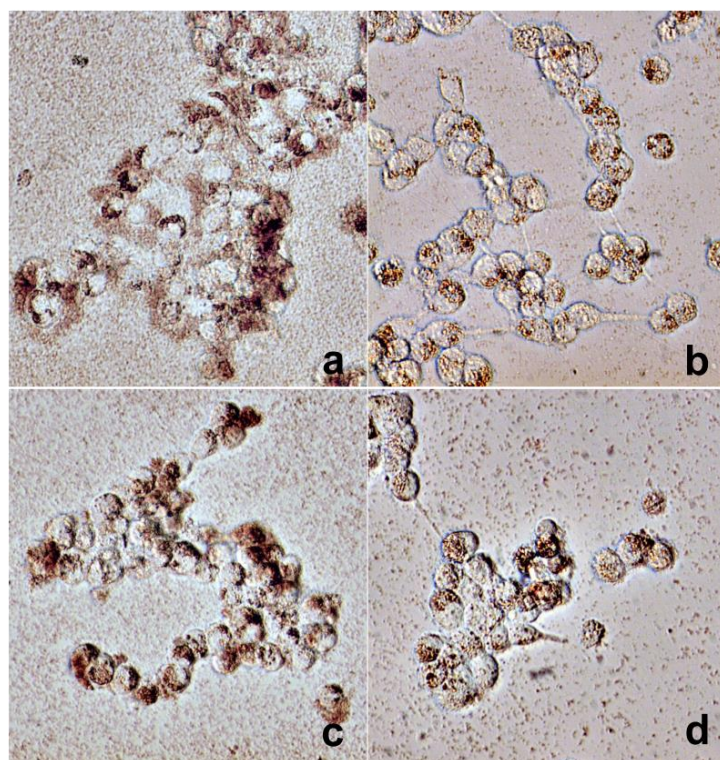

**Figure S9.** Optical microscope images (x400) of HEK-293 cells incubated with NC **18** at concentrations of (a) 0.1, (b) 0.05, (c) 0.01, and (d) 0.005 mg/mL.

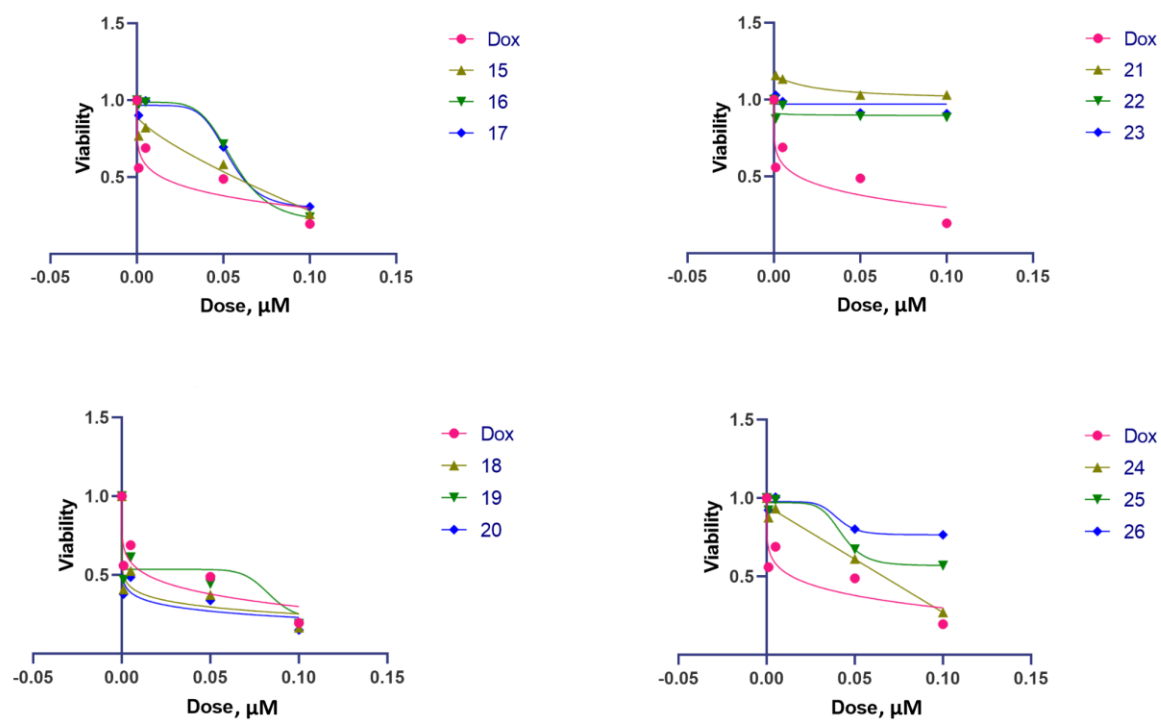

**Figure S10.** IC<sub>50</sub> curves.
